# Supplementary material for: Synthesis and anti-proliferative evaluation of novel 3,4-dihydro-2H-1,3-oxazine derivatives of bakuchiol
Source: Royal Society of Chemistry journal article supplement (doi:10.1039/c6ra23757f), 2016-01-01
Supplement: c6ra23757f1.pdf [file c6ra23757f1.pdf]

**Synthesis and anti-proliferative evaluation of novel 3,4-dihydro-2H-1,3-oxazine derivatives of bakuchiol**

Nidhi Gupta<sup>a</sup>, Sonia Sharma<sup>b</sup>, Arun Kumar<sup>a,c</sup>, Nisar A. Dangroo<sup>a</sup>, Shashi Bhushan<sup>a</sup>, Payare L. Sangwan<sup>a,c,\*</sup>

<sup>a</sup>*Bioorganic Chemistry Division, <sup>b</sup>Cancer Pharmacology Division, CSIR-Indian Institute of Integrative Medicine, Canal Road Jammu-180001, India*

<sup>c</sup>*Academy of Scientific and Innovative Research (AcSIR), CSIR-IIIM Campus, Jammu, India*

\*Corresponding authors. Tel.: +91 191 2585006-13 Extn. 371; fax +91 191 2586333.

E-mails; [plsangwan@iiim.ac.in](mailto:plsangwan@iiim.ac.in) (P.L. Sangwan)

**CONTENTS:**

|                                                                                           |      |
|-------------------------------------------------------------------------------------------|------|
| Section A: General experimental procedure                                                 | 2    |
| Section B: <sup>1</sup> H NMR, <sup>13</sup> C NMR, DEPT135 and HRMS spectra of compounds | 3-52 |

## Section A: General experimental procedure

### General methods:

All the reagents and solvents for synthesis were purchased from Sigma-Aldrich. All the chemical reactions were monitored by TLC on silica gel 60 F<sub>254</sub> plates (E. Merck) using 2% ceric ammonium sulphate solution as spraying reagent for detection of spots. Purification of all derivatives was carried out by column chromatography using silica gel 60-120 mesh as stationary phase. All NMR spectra were recorded on Bruker DPX 400 and DPX 500 instruments using CDCl<sub>3</sub> as the solvent taking TMS as the internal standard. The chemical shifts are expressed in  $\delta$  and coupling constant in Hertz. High Resolution Mass Spectra (HRMS) were recorded on Agilent Technologies 6540 instrument. IR recorded on an FT-IR Bruker (270-30) spectrophotometer.

### General procedure

Compounds **2-26** were synthesized by portion wise addition of respective primary amine (0.39 mmol) in 3ml of tetrahydrofuran containing 37% aqueous formaldehyde (0.78 mmol) followed by the addition of methanolic solution of bakuchiol (100mg, 0.39mmol). The reaction mixture was heated under reflux for 2-8 hours till the completion (monitored by TLC analysis). Workup of the reaction was done by diluting the reaction mixture with ice-cold water and extracting it with ethyl acetate (3 times). The combined organic layers were dried over sodium sulphate and concentrated on rotavapour. The crude product obtained was purified by column chromatography on silica gel 60-120 mesh with EtoAc: Hexane (1: 50) as the eluent to afford the desired pure products **2-26** in 80-85% yield.

Section B:  $^1\text{H}$  NMR,  $^{13}\text{C}$  NMR, DEPT135 and HRMS spectra of compounds 2-26

3,4-dihydro-6-(3,7-dimethyl-3-vinylocta-1,6-dienyl)-3-phenyl-2H-benzo[e][1,3]oxazine  
(2)

2 -  $^1\text{H}$  NMR

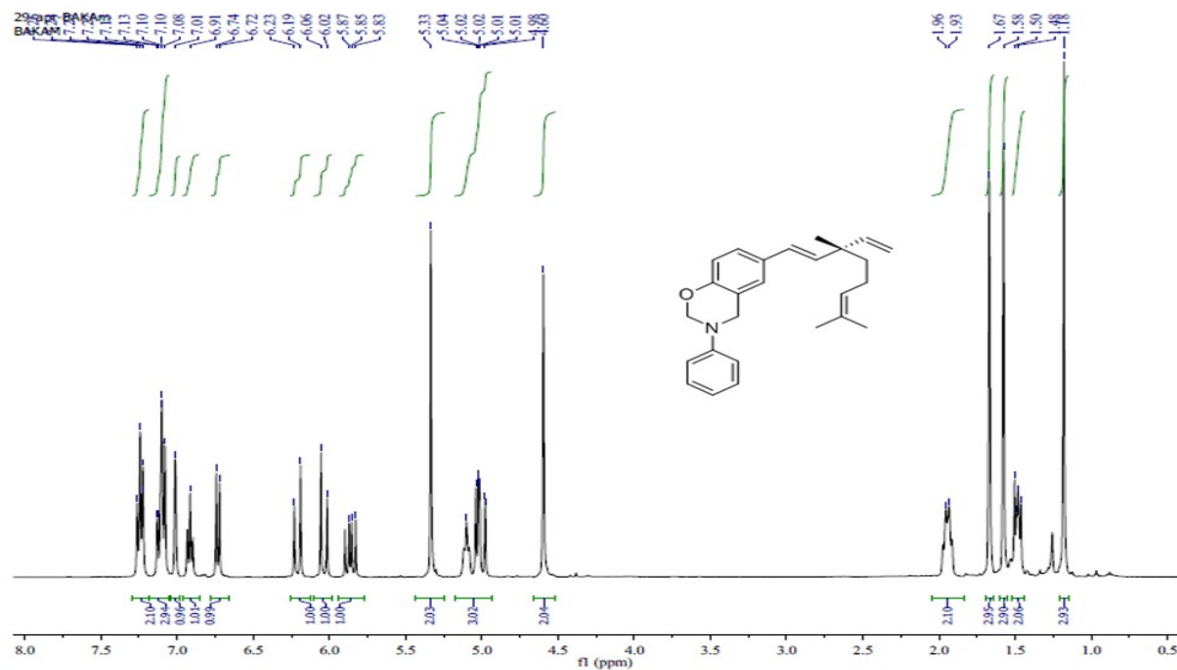

2 -  $^{13}\text{C}$  NMR

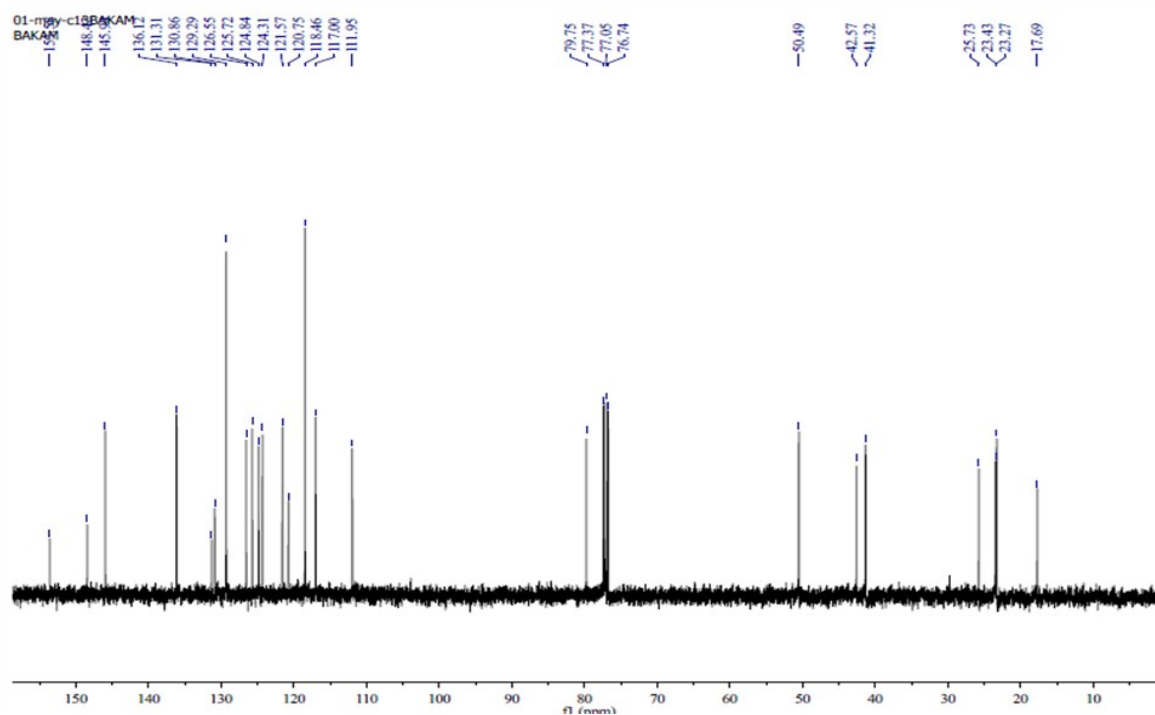

## DEPT-2

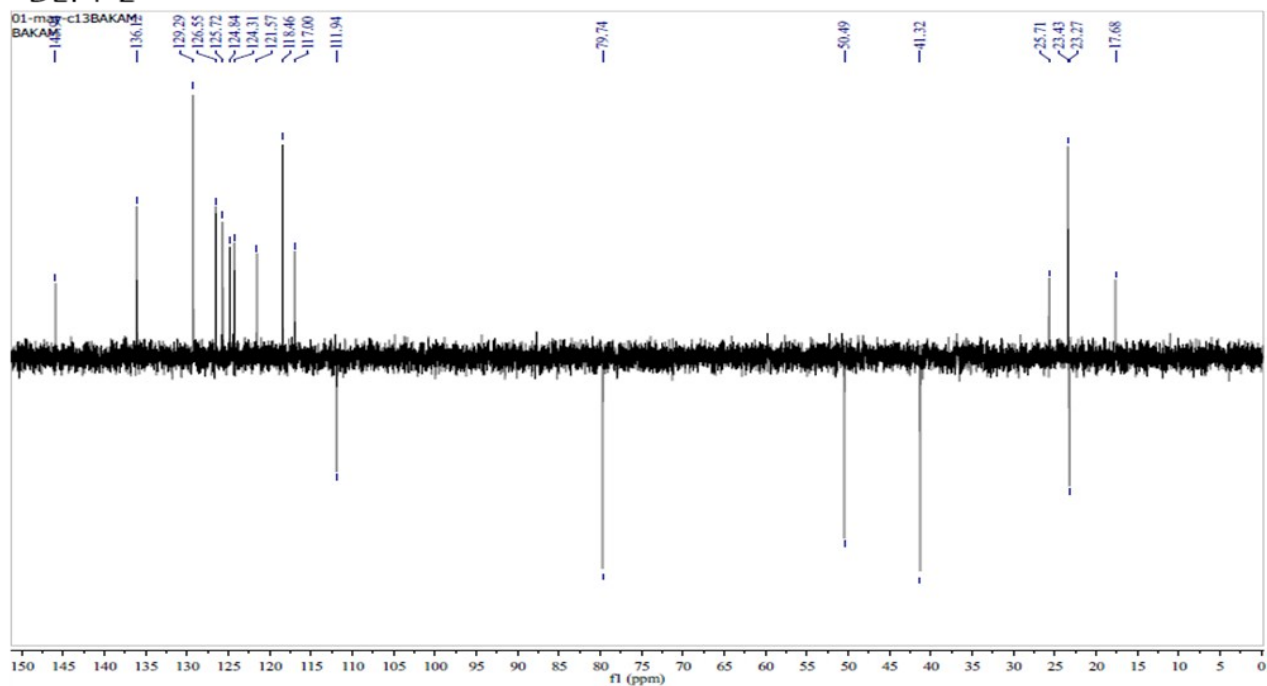

## 2 - HRMS

### Compound Table

| Compound Label                              | RT    | Mass     | Formula                             | MFG Formula                         | MFG Diff (ppm) | DB Formula                          |
|---------------------------------------------|-------|----------|-------------------------------------|-------------------------------------|----------------|-------------------------------------|
| Cpd 40: C <sub>26</sub> H <sub>31</sub> N O | 0.266 | 373.2403 | C <sub>26</sub> H <sub>31</sub> N O | C <sub>26</sub> H <sub>31</sub> N O | 0.67           | C <sub>26</sub> H <sub>31</sub> N O |

| Compound Label                              | m/z      | RT    | Algorithm                 | Mass     |
|---------------------------------------------|----------|-------|---------------------------|----------|
| Cpd 40: C <sub>26</sub> H <sub>31</sub> N O | 374.2478 | 0.266 | Find by Molecular Feature | 373.2403 |

### MFE MS Spectrum

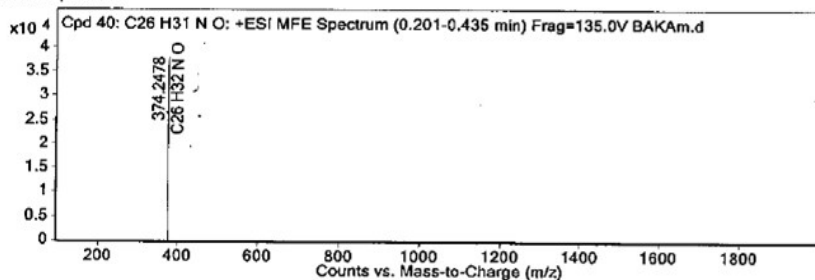

### MS Spectrum Peak List

| m/z      | z | Abund    | Formula                             | Ion                |
|----------|---|----------|-------------------------------------|--------------------|
| 374.2478 | 1 | 38039.36 | C <sub>26</sub> H <sub>32</sub> N O | (M+H) <sup>+</sup> |
| 375.2506 | 1 | 10830.28 | C <sub>26</sub> H <sub>32</sub> N O | (M+H) <sup>+</sup> |
| 376.2522 | 1 | 1952.6   | C <sub>26</sub> H <sub>32</sub> N O | (M+H) <sup>+</sup> |
| 377.2602 | 1 | 286.67   | C <sub>26</sub> H <sub>32</sub> N O | (M+H) <sup>+</sup> |

### Predicted Isotope Match Table

| Isotope | m/z      | Calc m/z | Diff (ppm) | Abund % | Calc Abund % | Abund Sum % | Calc Abund Sum % |
|---------|----------|----------|------------|---------|--------------|-------------|------------------|
| 1       | 374.2478 | 374.2478 | 0.2        | 100     | 100          | 74.43       | 74.89            |
| 2       | 375.2506 | 375.2512 | 1.6        | 28.47   | 28.89        | 21.19       | 21.64            |
| 3       | 376.2522 | 376.2544 | 5.78       | 5.13    | 4.23         | 3.82        | 3.17             |
| 4       | 377.2602 | 377.2574 | -7.19      | 0.75    | 0.42         | 0.56        | 0.31             |



## DEPT-3

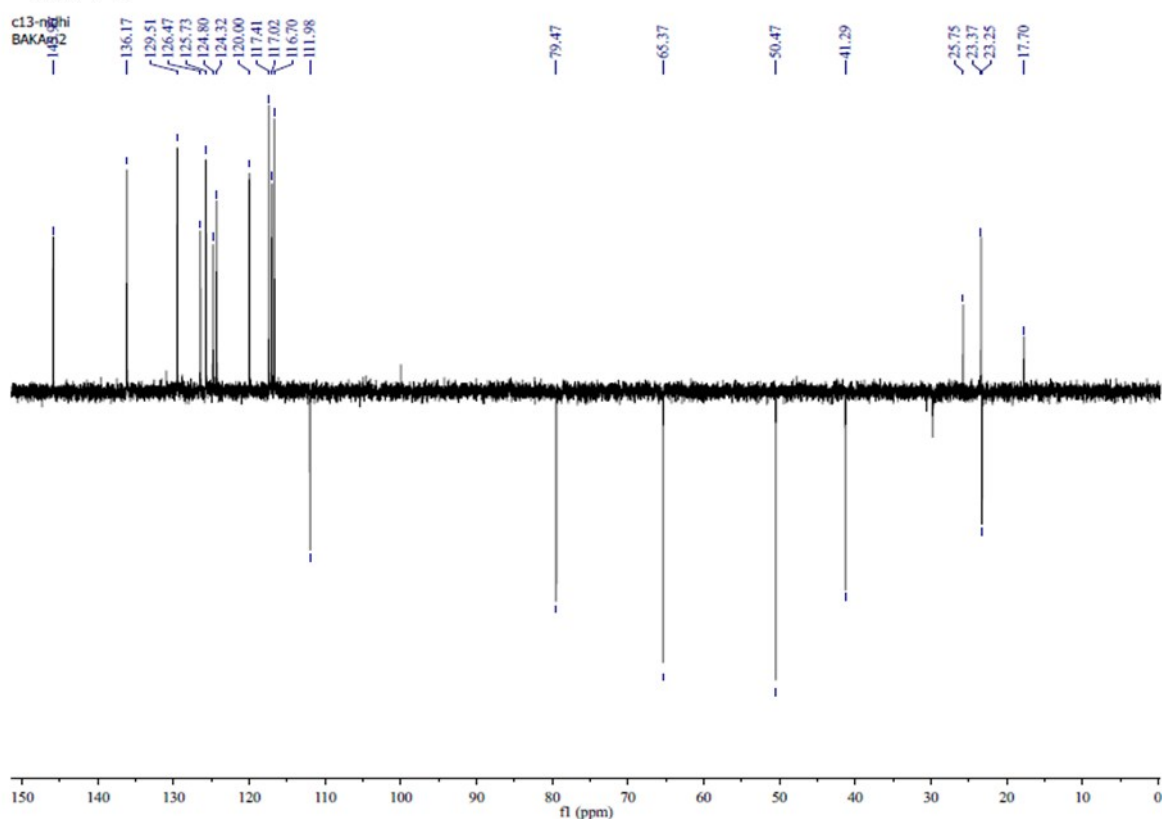

## 3 - HRMS

### Compound Table

| Compound Label                                           | RT    | Mass     | Formula                                          | MFG Formula                                      | MFG Diff (ppm) | DB Formula                                       |
|----------------------------------------------------------|-------|----------|--------------------------------------------------|--------------------------------------------------|----------------|--------------------------------------------------|
| Cpd 23: C <sub>27</sub> H <sub>33</sub> N O <sub>2</sub> | 0.264 | 403.2506 | C <sub>27</sub> H <sub>33</sub> N O <sub>2</sub> | C <sub>27</sub> H <sub>33</sub> N O <sub>2</sub> | 1.27           | C <sub>27</sub> H <sub>33</sub> N O <sub>2</sub> |

| Compound Label                                           | m/z      | RT    | Algorithm                 | Mass     |
|----------------------------------------------------------|----------|-------|---------------------------|----------|
| Cpd 23: C <sub>27</sub> H <sub>33</sub> N O <sub>2</sub> | 404.2582 | 0.264 | Find by Molecular Feature | 403.2506 |

### MFE MS Spectrum

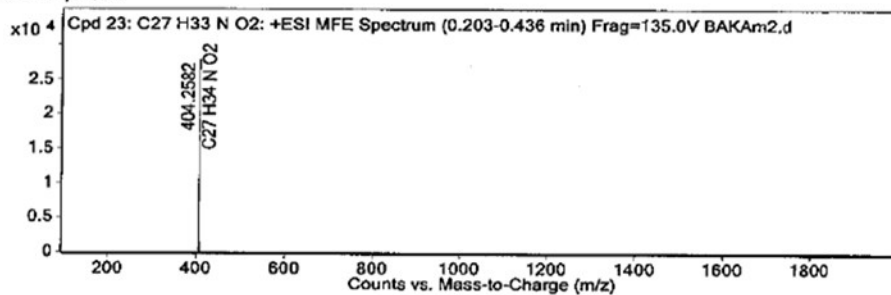

### MS Spectrum Peak List

| m/z      | z | Abund    | Formula                                          | Ion                |
|----------|---|----------|--------------------------------------------------|--------------------|
| 404.2582 | 1 | 27915.57 | C <sub>27</sub> H <sub>34</sub> N O <sub>2</sub> | (M+H) <sup>+</sup> |
| 405.2607 | 1 | 7608.7   | C <sub>27</sub> H <sub>34</sub> N O <sub>2</sub> | (M+H) <sup>+</sup> |
| 406.2645 | 1 | 1530.77  | C <sub>27</sub> H <sub>34</sub> N O <sub>2</sub> | (M+H) <sup>+</sup> |
| 407.2539 | 1 | 295.98   | C <sub>27</sub> H <sub>34</sub> N O <sub>2</sub> | (M+H) <sup>+</sup> |

### Predicted Isotope Match Table

| Isotope | m/z      | Calc m/z | Diff (ppm) | Abund % | Calc Abund % | Abund Sum % | Calc Abund Sum % |
|---------|----------|----------|------------|---------|--------------|-------------|------------------|
| 1       | 404.2582 | 404.2584 | 0.61       | 100     | 100          | 74.74       | 73.9             |
| 2       | 405.2607 | 405.2617 | 2.45       | 27.26   | 30.04        | 20.37       | 22.19            |
| 3       | 406.2645 | 406.2648 | 0.87       | 5.48    | 4.76         | 4.1         | 3.52             |
| 4       | 407.2539 | 407.2678 | 34.06      | 1.06    | 0.53         | 0.79        | 0.39             |

**3-(4-chlorophenyl)-3,4-dihydro-6-(3,7-dimethyl-3-vinylocta-1,6-dienyl)-2H-benzo[e][1,3]oxazine(4)**

**4 - <sup>1</sup>H NMR**

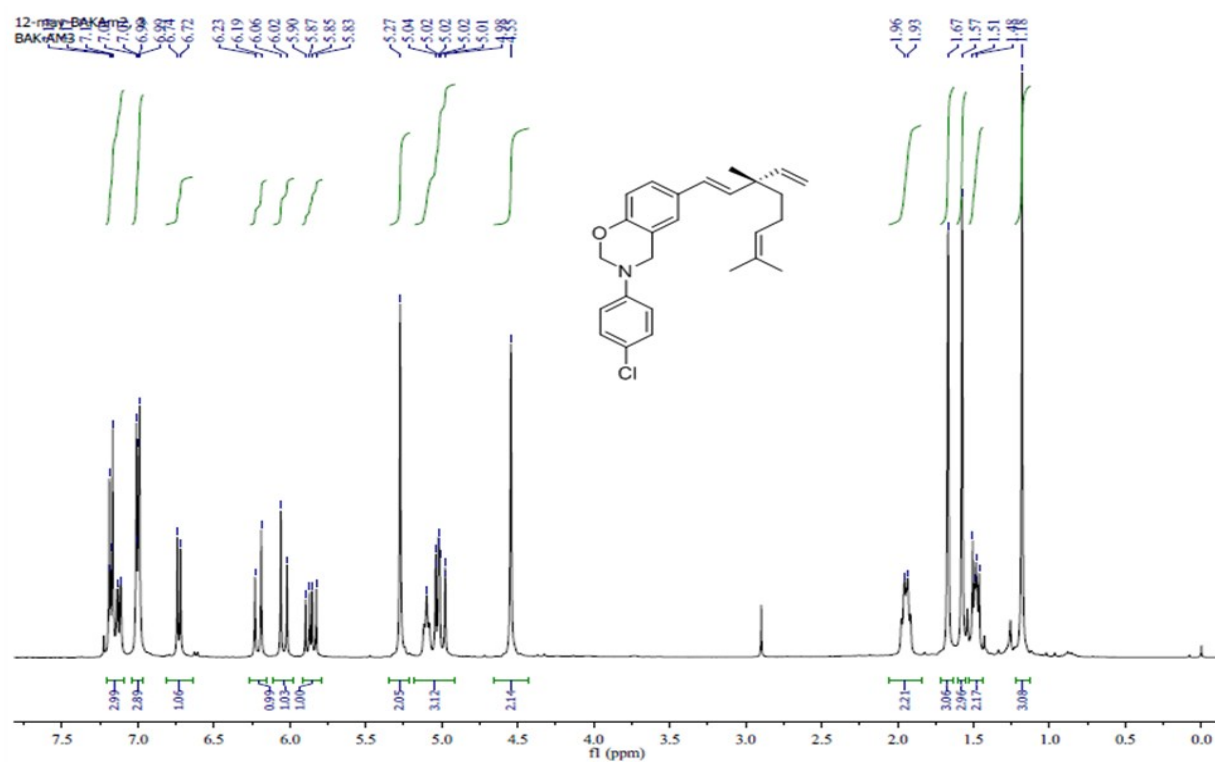

**4 - <sup>13</sup>C NMR**

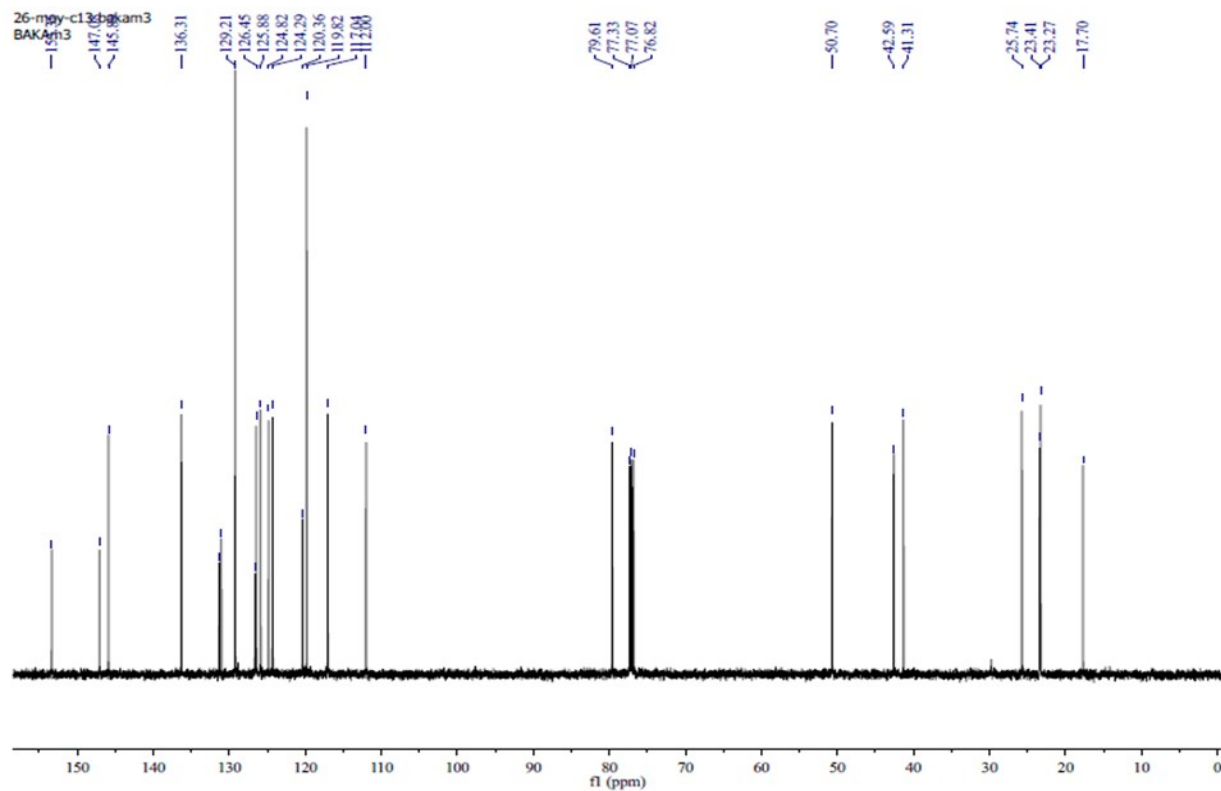

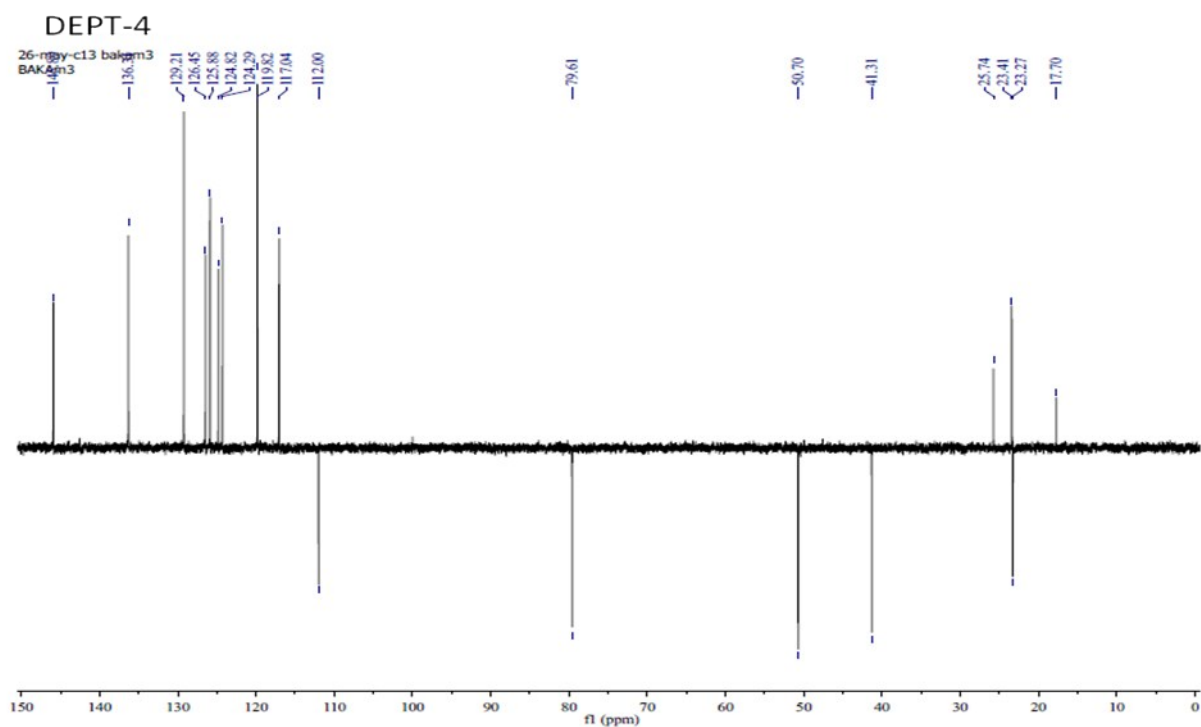

## 4 - HRMS

Compound Table

| Compound Label                                             | RT    | Mass     | Formula                                            | MPG Formula                                        | MPG Diff (ppm) | DS Formula                                         |
|------------------------------------------------------------|-------|----------|----------------------------------------------------|----------------------------------------------------|----------------|----------------------------------------------------|
| Cpd 42: C <sub>26</sub> H <sub>30</sub> ClN <sub>2</sub> O | 0.267 | 407.2009 | C <sub>26</sub> H <sub>30</sub> ClN <sub>2</sub> O | C <sub>26</sub> H <sub>30</sub> ClN <sub>2</sub> O | 1.71           | C <sub>26</sub> H <sub>30</sub> ClN <sub>2</sub> O |

| Compound Label                                             | m/z      | RT    | Algorithm                 | Mass     |
|------------------------------------------------------------|----------|-------|---------------------------|----------|
| Cpd 42: C <sub>26</sub> H <sub>30</sub> ClN <sub>2</sub> O | 408.2083 | 0.267 | Find by Molecular Feature | 407.2009 |

MFE MS Spectrum

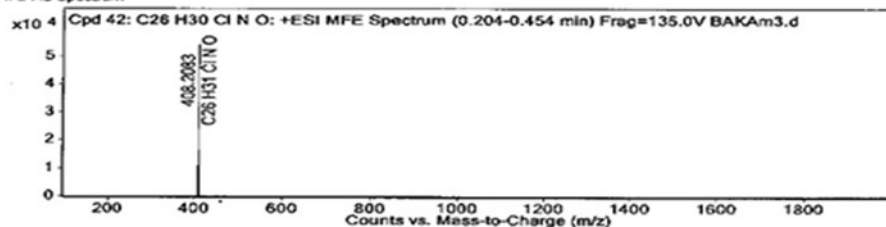

MFE MS Zoomed Spectrum

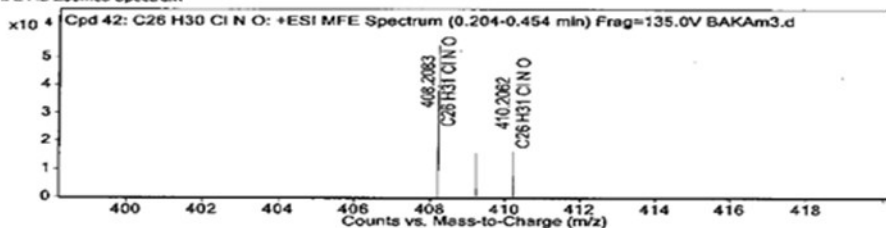

MS Spectrum Peak List

| m/z      | z | Abund    | Formula                                            | Ion                |
|----------|---|----------|----------------------------------------------------|--------------------|
| 408.2083 | 1 | 53981.57 | C <sub>26</sub> H <sub>31</sub> ClN <sub>2</sub> O | (M+H) <sup>+</sup> |
| 409.2112 | 1 | 15755.09 | C <sub>26</sub> H <sub>31</sub> ClN <sub>2</sub> O | (M+H) <sup>+</sup> |
| 410.2062 | 1 | 16357.71 | C <sub>26</sub> H <sub>31</sub> ClN <sub>2</sub> O | (M+H) <sup>+</sup> |

Predicted Isotope Match Table

| Isotope | m/z      | Calc m/z | Diff (ppm) | Abund % | Calc Abund % | Abund Sum % | Calc Abund Sum % |
|---------|----------|----------|------------|---------|--------------|-------------|------------------|
| 1       | 408.2083 | 408.2089 | 1.48       | 100     | 100          | 62.7        | 60.57            |
| 2       | 409.2112 | 409.2122 | 2.28       | 29.19   | 28.88        | 18.3        | 17.49            |
| 3       | 410.2062 | 410.207  | 1.9        | 30.3    | 36.22        | 19          | 21.94            |



**3,4-dihydro-3-(4-methoxyphenyl)-6-(3,7-dimethyl-3-vinylocta-1,6-dienyl)-2H-benzo[e][1,3]oxazine (5)**

**5 -  $^1\text{H}$  NMR**

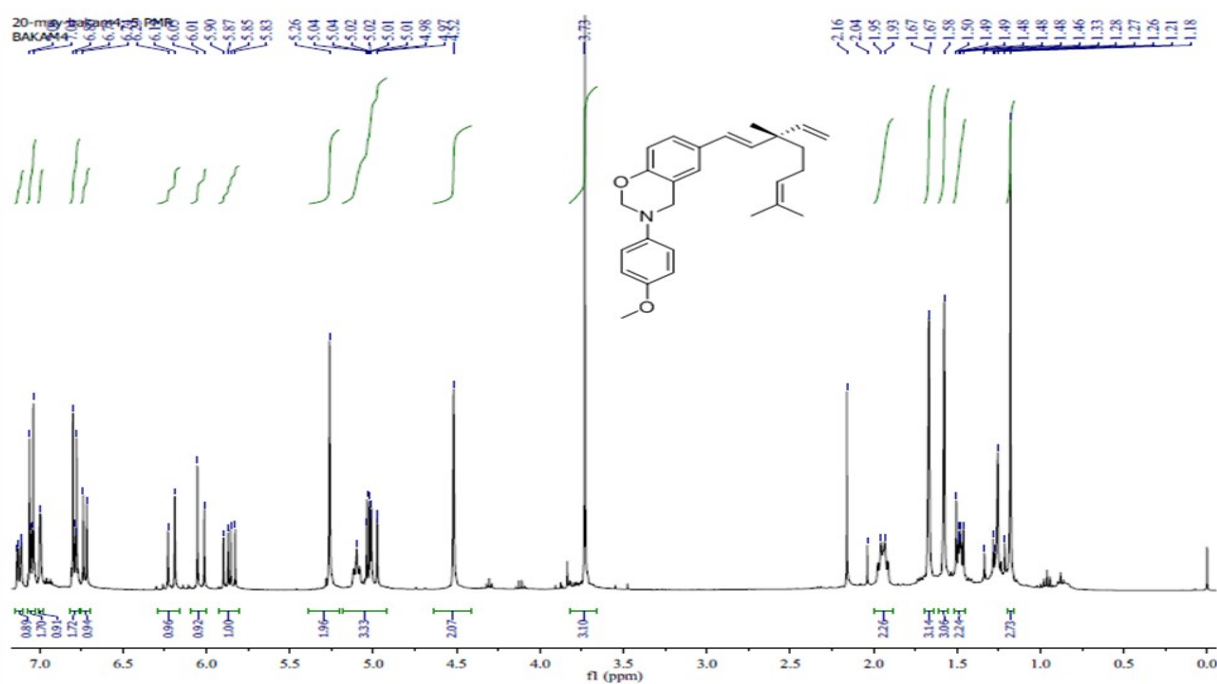

**5 -  $^{13}\text{C}$  NMR**

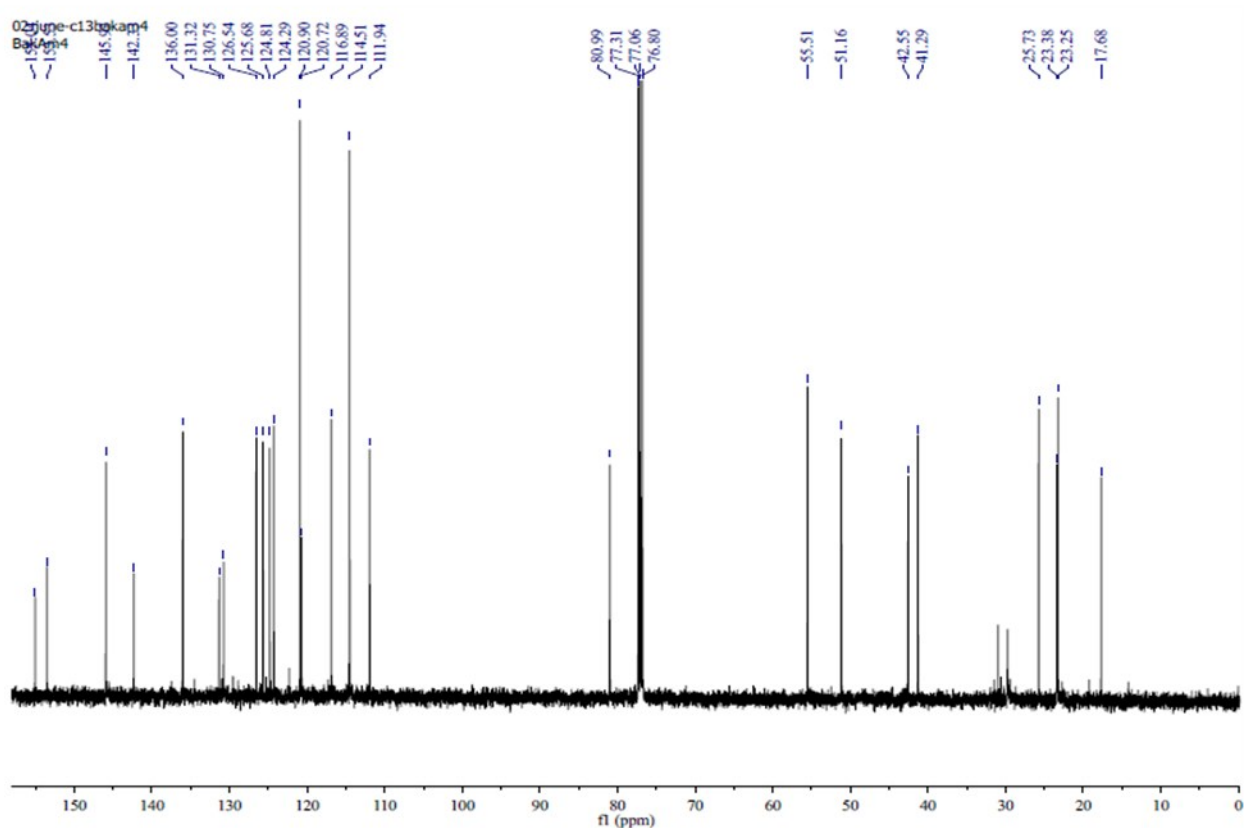

# DEPT-5

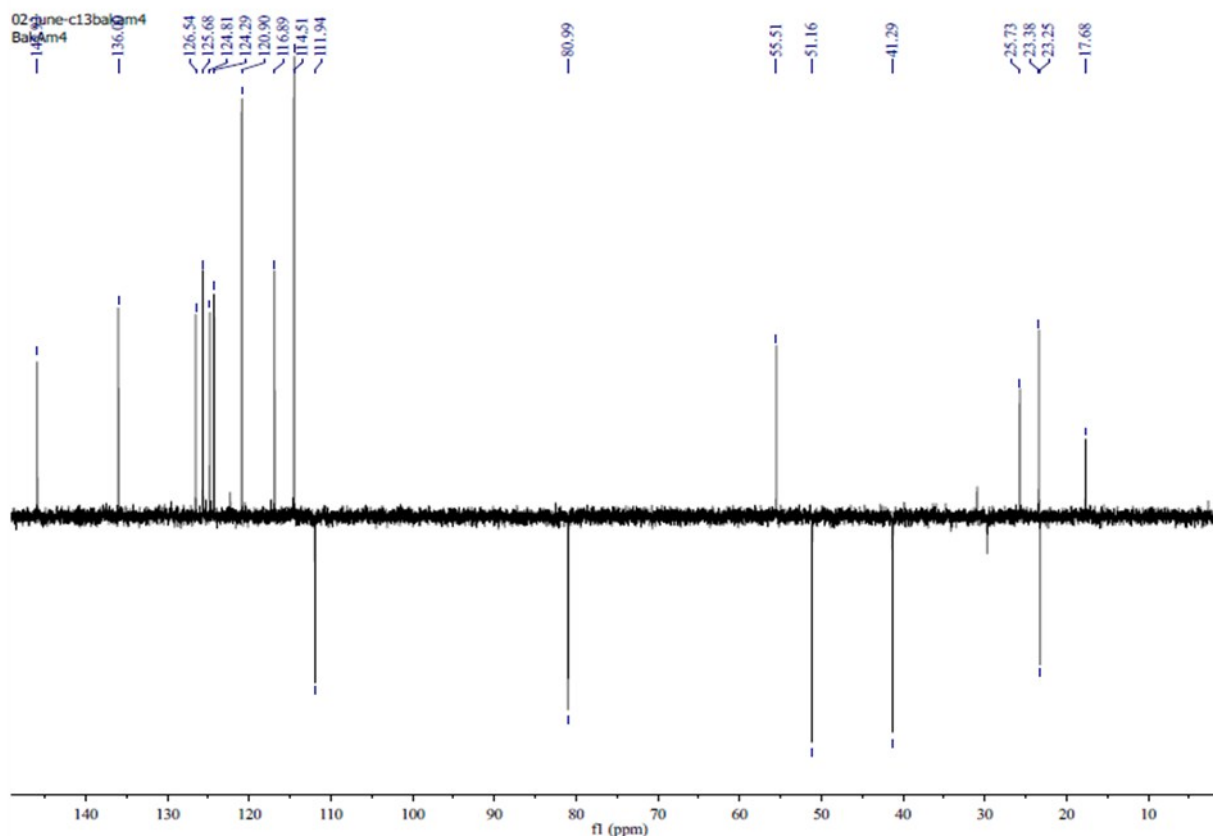

## 5 - HRMS

### Compound Table

| Compound Label       | RT    | Mass     | Formula      | MFG Formula  | MFG Diff (ppm) | DB Formula   |
|----------------------|-------|----------|--------------|--------------|----------------|--------------|
| Cpd 28: C27 H33 N O2 | 0.273 | 403.2511 | C27 H33 N O2 | C27 H33 N O2 | -0.03          | C27 H33 N O2 |

| Compound Label       | m/z      | RT    | Algorithm                 | Mass     |
|----------------------|----------|-------|---------------------------|----------|
| Cpd 28: C27 H33 N O2 | 404.2585 | 0.273 | Find by Molecular Feature | 403.2511 |

### MFE MS Spectrum

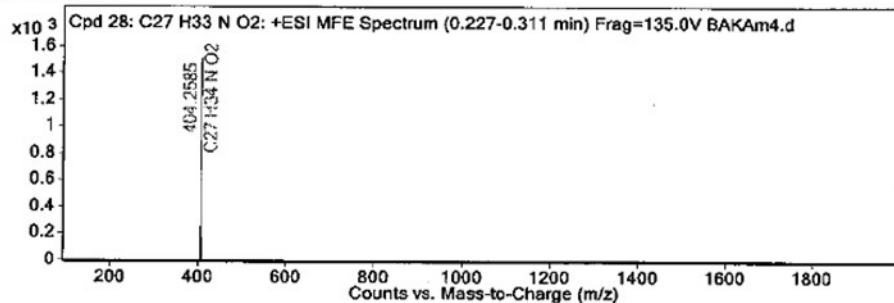

### MS Spectrum Peak List

| m/z      | z | Abund   | Formula      | Ion    |
|----------|---|---------|--------------|--------|
| 404.2585 | 1 | 1514.91 | C27 H34 N O2 | (M+H)+ |
| 405.2596 | 1 | 484.4   | C27 H34 N O2 | (M+H)+ |
| 406.2703 | 1 | 166.07  | C27 H34 N O2 | (M+H)+ |

### Predicted Isotope Match Table

| Isotope | m/z      | Calc m/z | Diff (ppm) | Abund % | Calc Abund % | Abund Sum % | Calc Abund Sum % |
|---------|----------|----------|------------|---------|--------------|-------------|------------------|
| 1       | 404.2585 | 404.2584 | -0.27      | 100     | 100          | 69.96       | 74.19            |
| 2       | 405.2596 | 405.2617 | 5.33       | 31.98   | 30.04        | 22.37       | 22.28            |
| 3       | 406.2703 | 406.2648 | -13.35     | 10.96   | 4.76         | 7.67        | 3.53             |

**3-(4-fluorophenyl)-3,4-dihydro-6-(3,7-dimethyl-3-vinylocta-1,6-dienyl)-2H-benzo[e][1,3]oxazine(6)**

**6 -  $^1\text{H}$  NMR**

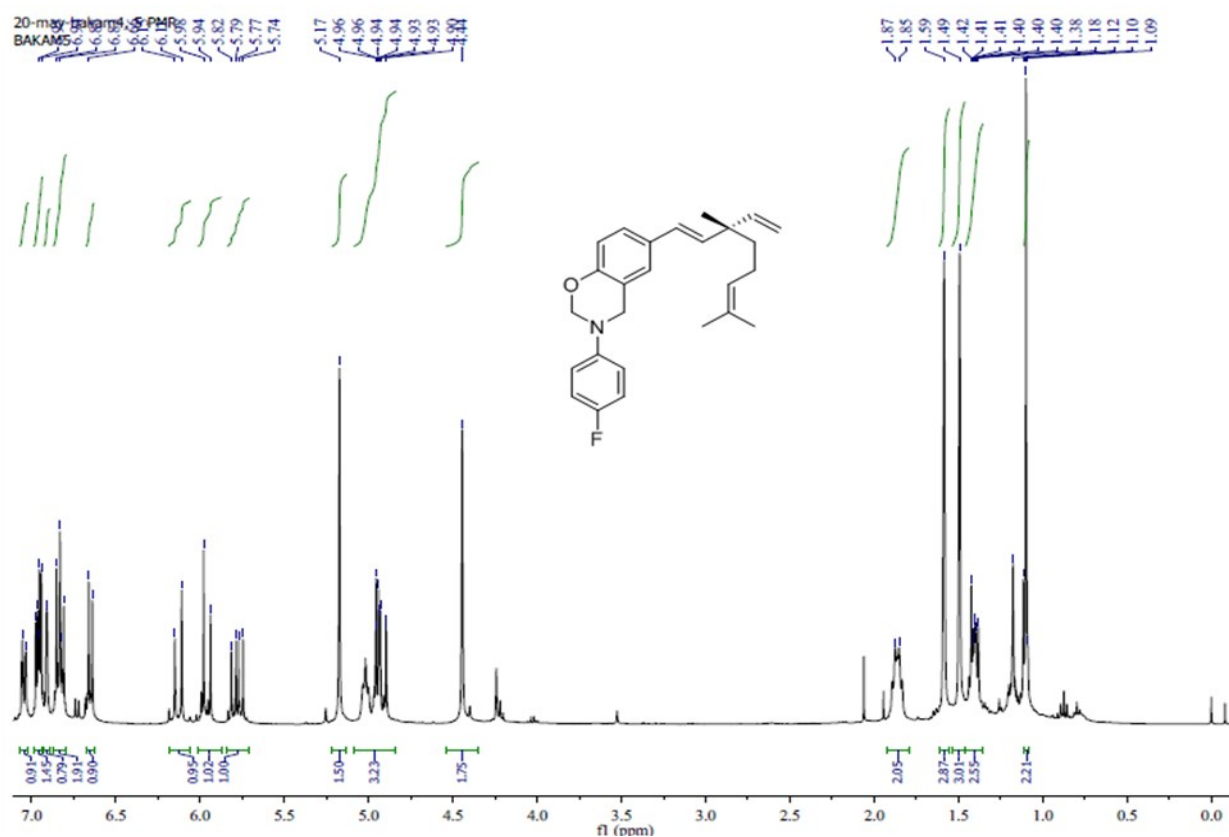

**6 -  $^{13}\text{C}$  NMR**

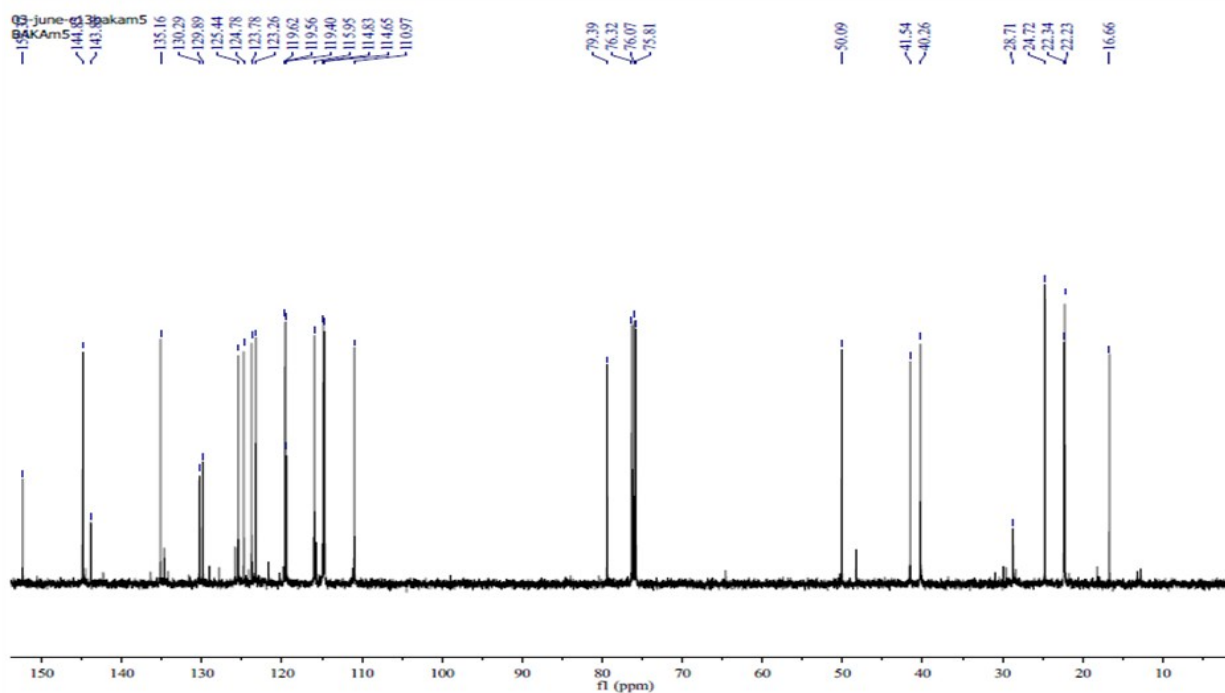

## DEPT-6

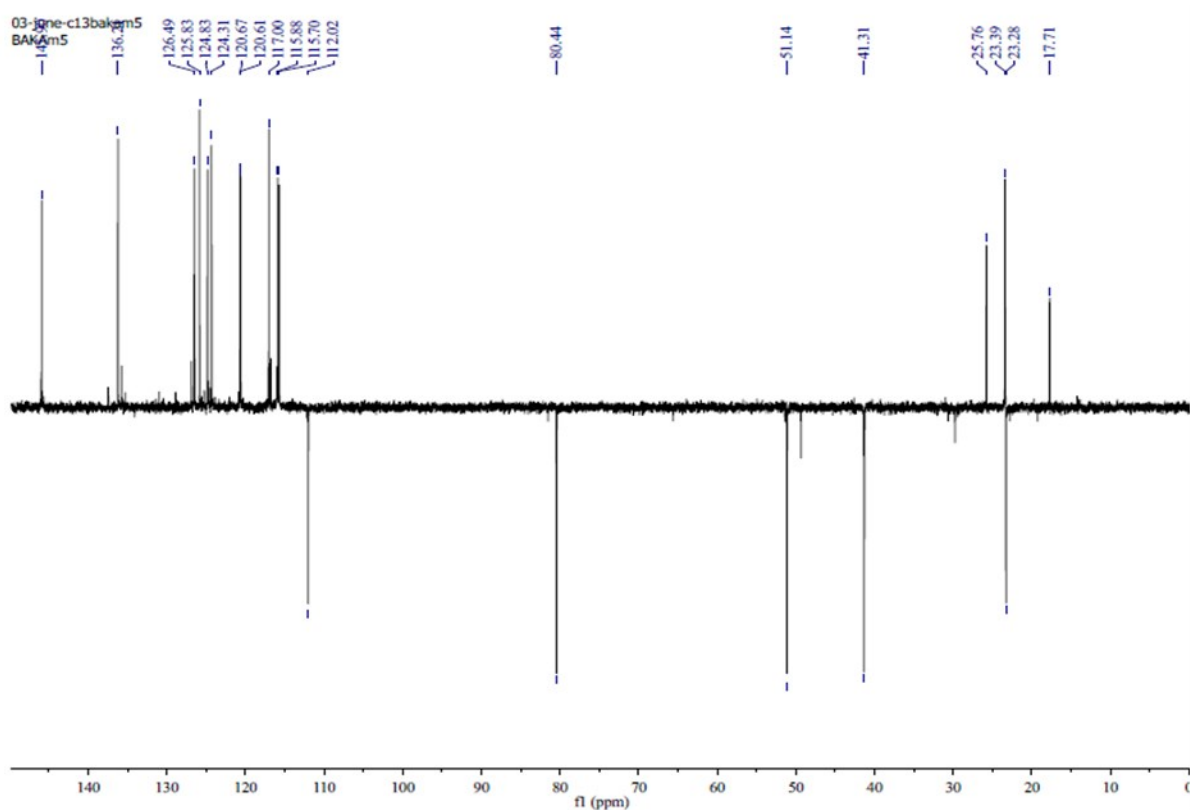

## 6 - HRMS

## Compound Table

| Compound Label                                                          | RT    | Mass     | Formula                                                         | MFG Formula                                                     | MFG Diff (ppm) | DB Formula                                                      |
|-------------------------------------------------------------------------|-------|----------|-----------------------------------------------------------------|-----------------------------------------------------------------|----------------|-----------------------------------------------------------------|
| Cpd 27: C <sub>26</sub> H <sub>30</sub> F <sub>3</sub> N <sub>2</sub> O | 0.266 | 391.2305 | C <sub>26</sub> H <sub>30</sub> F <sub>3</sub> N <sub>2</sub> O | C <sub>26</sub> H <sub>30</sub> F <sub>3</sub> N <sub>2</sub> O | 1.72           | C <sub>26</sub> H <sub>30</sub> F <sub>3</sub> N <sub>2</sub> O |

| Compound Label                                                          | m/z      | RT    | Algorithm                 | Mass     |
|-------------------------------------------------------------------------|----------|-------|---------------------------|----------|
| Cpd 27: C <sub>26</sub> H <sub>30</sub> F <sub>3</sub> N <sub>2</sub> O | 392.2383 | 0.266 | Find by Molecular Feature | 391.2305 |

## MFE MS Spectrum

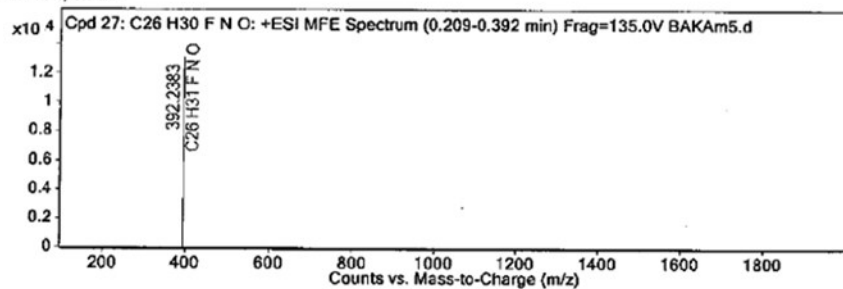

## MS Spectrum Peak List

| m/z      | z | Abund   | Formula                                                         | Ion                |
|----------|---|---------|-----------------------------------------------------------------|--------------------|
| 392.2383 | 1 | 13130.8 | C <sub>26</sub> H <sub>31</sub> F <sub>3</sub> N <sub>2</sub> O | (M+H) <sup>+</sup> |
| 393.2417 | 1 | 3059.76 | C <sub>26</sub> H <sub>31</sub> F <sub>3</sub> N <sub>2</sub> O | (M+H) <sup>+</sup> |
| 394.236  | 1 | 1116.6  | C <sub>26</sub> H <sub>31</sub> F <sub>3</sub> N <sub>2</sub> O | (M+H) <sup>+</sup> |

## Predicted Isotope Match Table

| Isotope | m/z      | Calc m/z | Diff (ppm) | Abund % | Calc Abund % | Abund Sum % | Calc Abund Sum % |
|---------|----------|----------|------------|---------|--------------|-------------|------------------|
| 1       | 392.2383 | 392.2384 | 0.32       | 100     | 100          | 75.87       | 75.13            |
| 2       | 393.2417 | 393.2417 | 0.07       | 23.3    | 28.88        | 17.68       | 21.7             |
| 3       | 394.236  | 394.2449 | 22.59      | 8.5     | 4.22         | 6.45        | 3.17             |

**3-hexyl-3,4-dihydro-6-(3,7-dimethyl-3-vinylocta-1,6-dienyl)-2H-benzo[e][1,3]oxazine**  
(7)

**7 -  $^1\text{H}$  NMR**

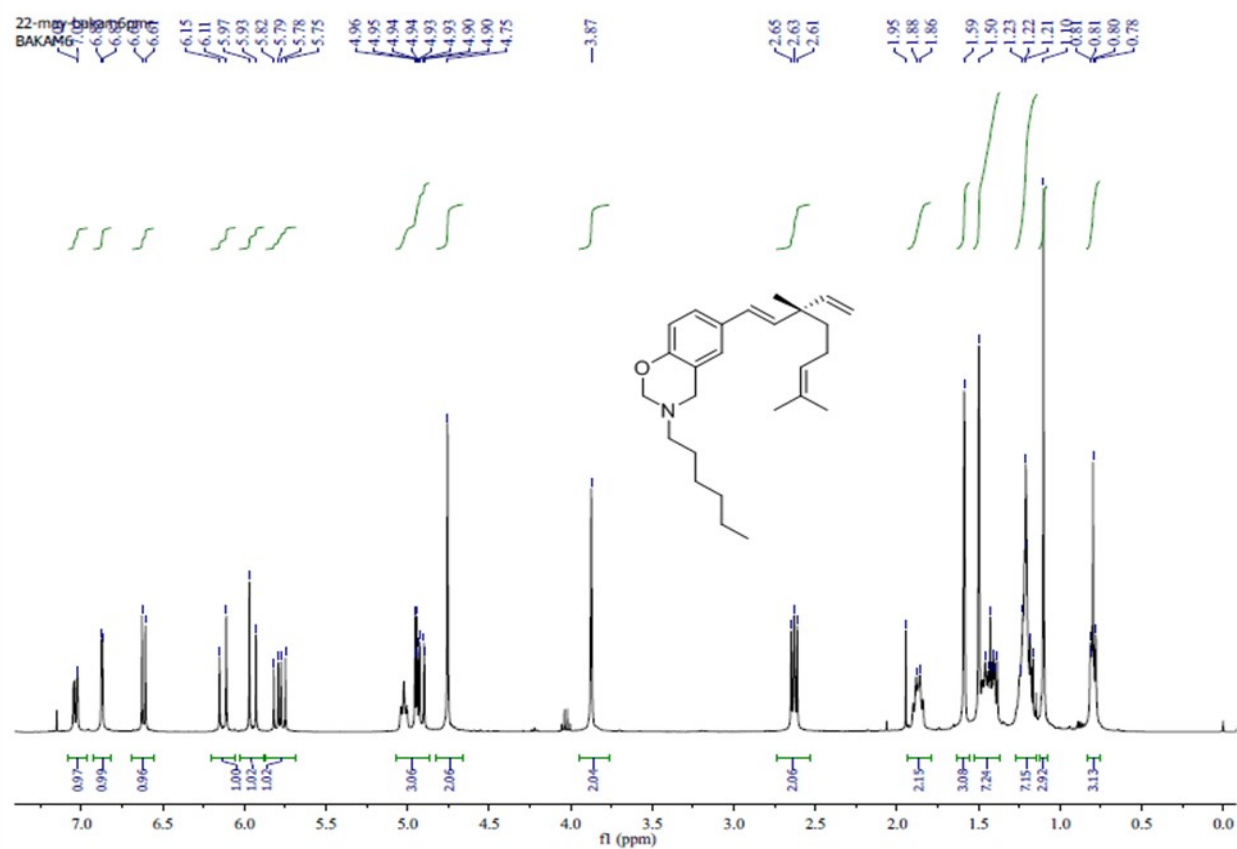

**7 -  $^{13}\text{C}$  NMR**

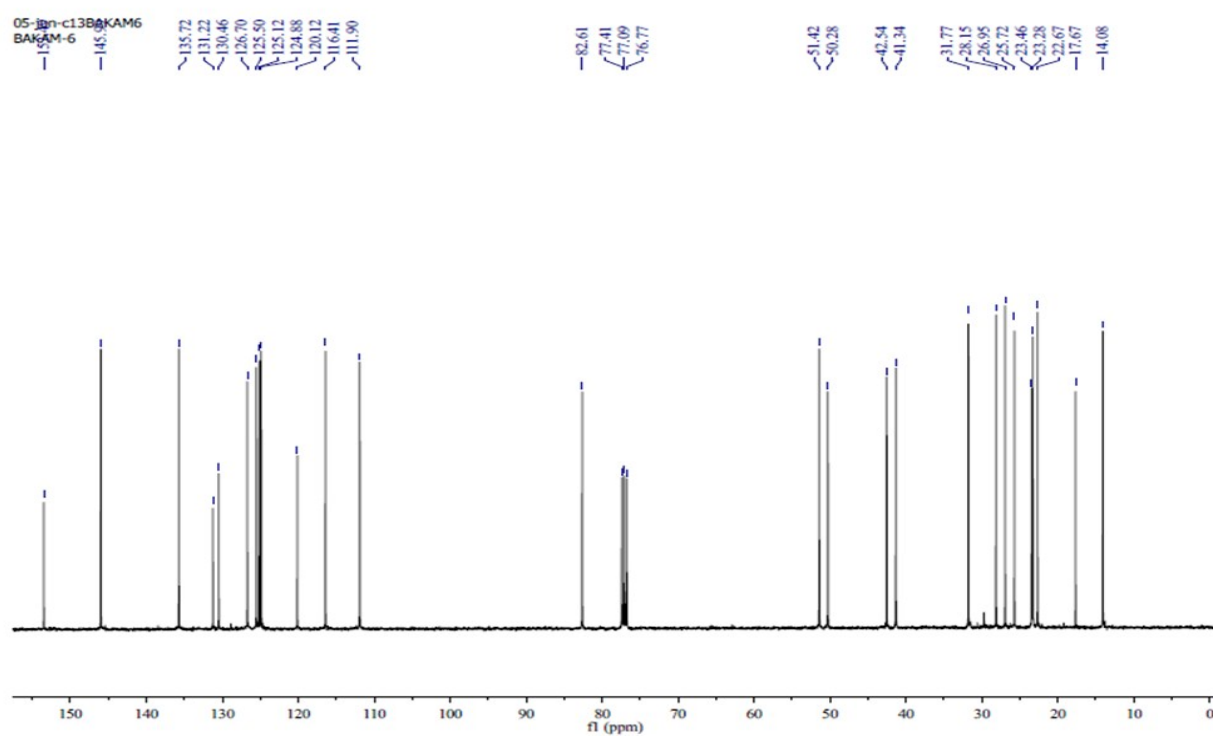

# DEPT-7

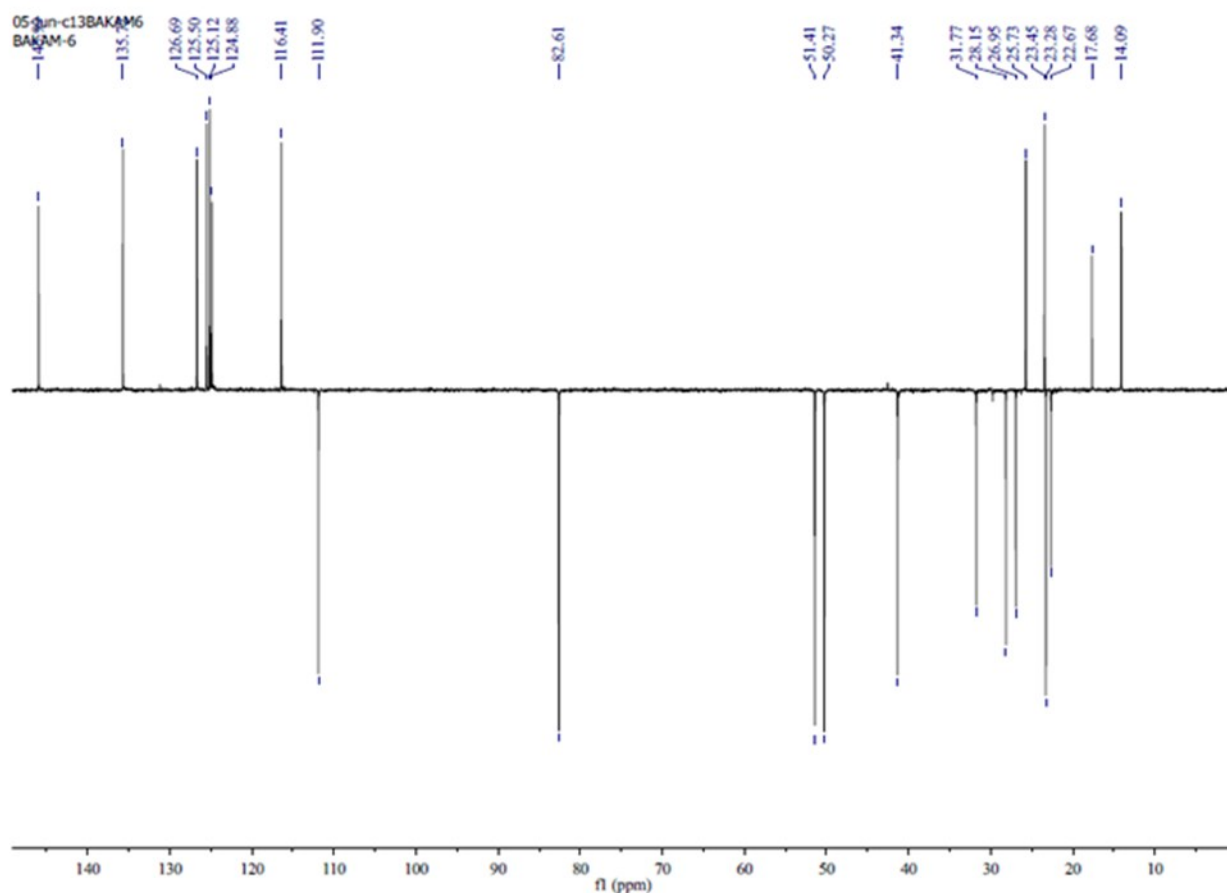

## 7 - HRMS

### Compound Table

| Compound Label                             | RT    | Mass     | Formula                             | MFG Formula                         | MFG Diff (ppm) | DB Formula                          |
|--------------------------------------------|-------|----------|-------------------------------------|-------------------------------------|----------------|-------------------------------------|
| Cpd 3: C <sub>26</sub> H <sub>39</sub> N O | 0.247 | 381.3009 | C <sub>26</sub> H <sub>39</sub> N O | C <sub>26</sub> H <sub>39</sub> N O | 6.06           | C <sub>26</sub> H <sub>39</sub> N O |

| Compound Label                             | m/z      | RT    | Algorithm                 | Mass     |
|--------------------------------------------|----------|-------|---------------------------|----------|
| Cpd 3: C <sub>26</sub> H <sub>39</sub> N O | 382.3082 | 0.247 | Find by Molecular Feature | 381.3009 |

### MFE MS Spectrum

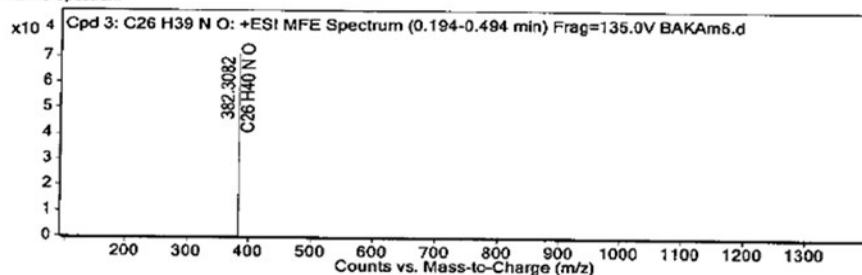

### MS Spectrum Peak List

| m/z      | z | Abund    | Formula                             | Ion                |
|----------|---|----------|-------------------------------------|--------------------|
| 382.3082 | 1 | 70958.67 | C <sub>26</sub> H <sub>40</sub> N O | (M+H) <sup>+</sup> |
| 383.3112 | 1 | 21317.11 | C <sub>26</sub> H <sub>40</sub> N O | (M+H) <sup>+</sup> |

### Predicted Isotope Match Table

| Isotope | m/z      | Calc m/z | Diff (ppm) | Abund % | Calc Abund % | Abund Sum % | Calc Abund Sum % |
|---------|----------|----------|------------|---------|--------------|-------------|------------------|
| 1       | 382.3082 | 382.3104 | 5.83       | 100     | 100          | 76.9        | 77.53            |
| 2       | 383.3112 | 383.3138 | 6.74       | 30.04   | 28.98        | 23.1        | 22.47            |

**3-(3,5-bis(trifluoromethyl)phenyl)-3,4-dihydro-6-(3,7-dimethyl-3-vinylocta-1,6-dienyl)-2H-benzo[e][1,3]oxazine (8)**

**8- <sup>1</sup>H NMR**

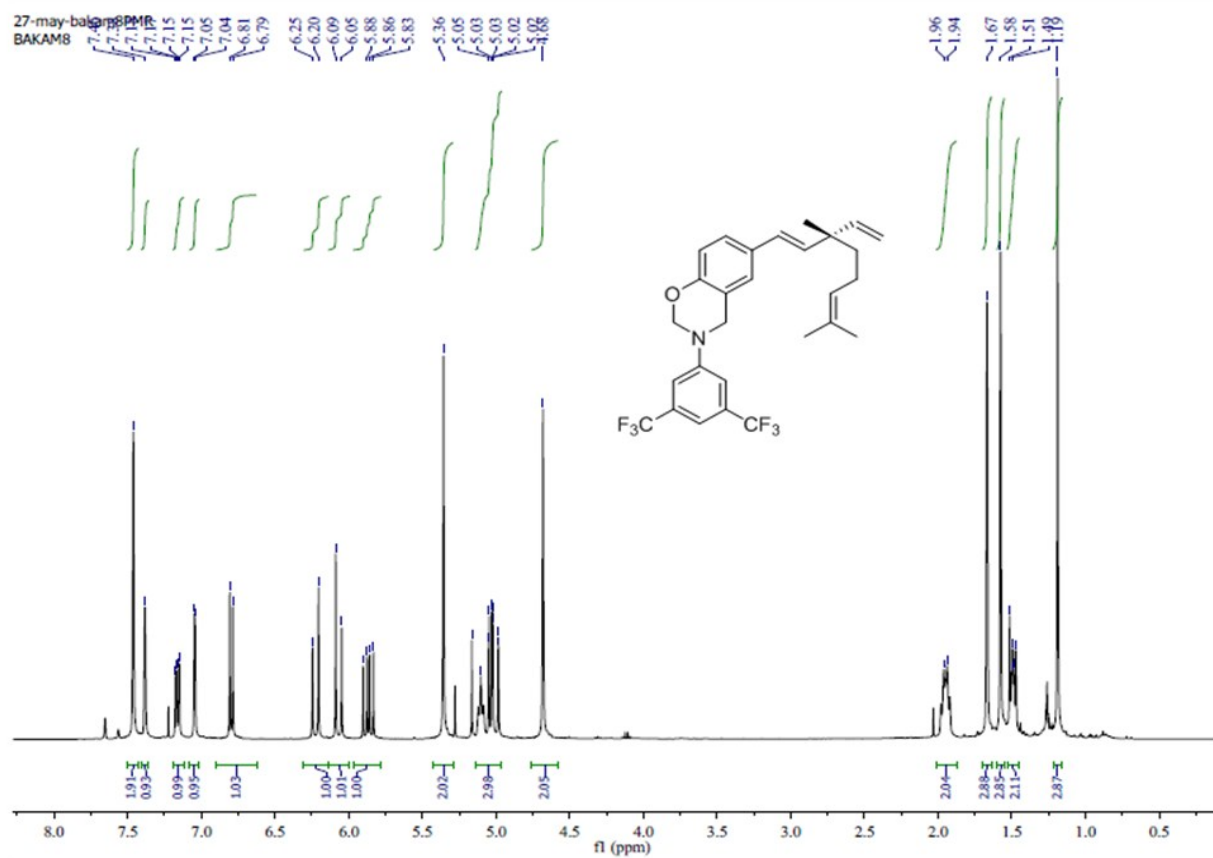

**8- <sup>13</sup>C NMR**

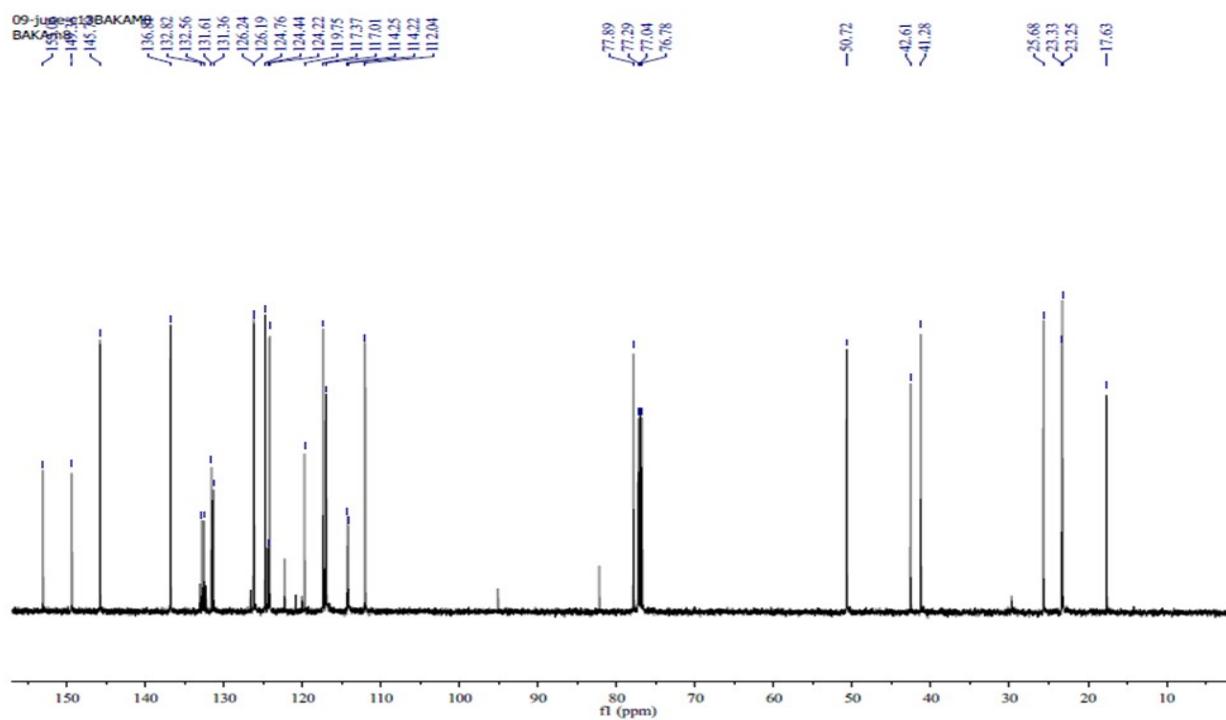



## DEPT-8

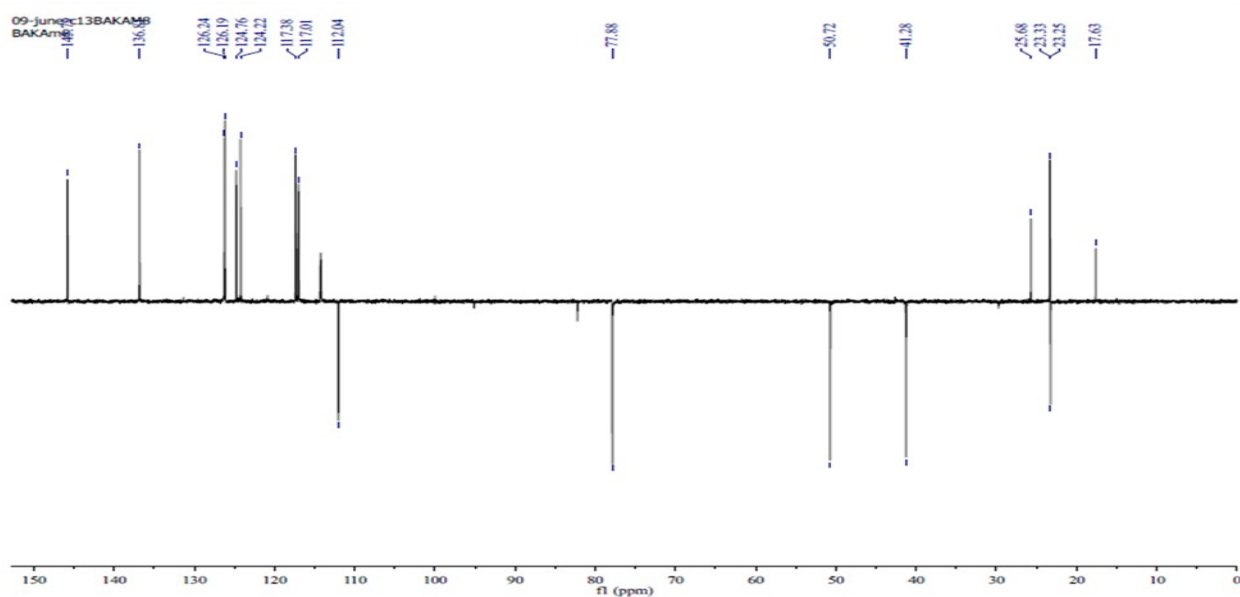

## 8- HRMS

## Compound Table

| Compound Label                                             | RT    | Mass     | Formula                                            | MFG Formula                                        | MFG Diff (ppm) | DB Formula                                         |
|------------------------------------------------------------|-------|----------|----------------------------------------------------|----------------------------------------------------|----------------|----------------------------------------------------|
| Cpd 25: C <sub>28</sub> H <sub>29</sub> F <sub>6</sub> N O | 0.269 | 509.2137 | C <sub>28</sub> H <sub>29</sub> F <sub>6</sub> N O | C <sub>28</sub> H <sub>29</sub> F <sub>6</sub> N O | 3.23           | C <sub>28</sub> H <sub>29</sub> F <sub>6</sub> N O |

| Compound Label                                             | m/z      | RT    | Algorithm                 | Mass     |
|------------------------------------------------------------|----------|-------|---------------------------|----------|
| Cpd 25: C <sub>28</sub> H <sub>29</sub> F <sub>6</sub> N O | 510.2211 | 0.269 | Find by Molecular Feature | 509.2137 |

## MFE MS Spectrum

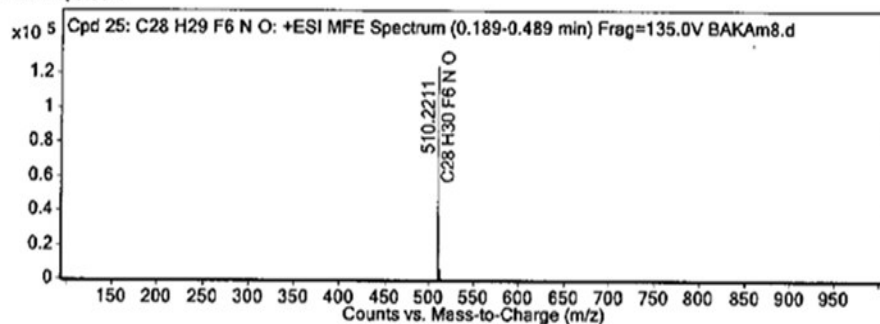

## MS Spectrum Peak List

| m/z      | z | Abund     | Formula                                            | Ion                |
|----------|---|-----------|----------------------------------------------------|--------------------|
| 510.2211 | 1 | 124293.93 | C <sub>28</sub> H <sub>30</sub> F <sub>6</sub> N O | (M+H) <sup>+</sup> |
| 511.2241 | 1 | 37413.97  | C <sub>28</sub> H <sub>30</sub> F <sub>6</sub> N O | (M+H) <sup>+</sup> |
| 512.2263 | 1 | 6533.87   | C <sub>28</sub> H <sub>30</sub> F <sub>6</sub> N O | (M+H) <sup>+</sup> |
| 513.2273 | 1 | 914.86    | C <sub>28</sub> H <sub>30</sub> F <sub>6</sub> N O | (M+H) <sup>+</sup> |

## Predicted Isotope Match Table

| Isotope | m/z      | Calc m/z | Diff (ppm) | Abund % | Calc Abund % | Abund Sum % | Calc Abund Sum % |
|---------|----------|----------|------------|---------|--------------|-------------|------------------|
| 1       | 510.2211 | 510.2226 | 2.95       | 100     | 100          | 73.48       | 73.31            |
| 2       | 511.2241 | 511.2259 | 3.59       | 30.1    | 31.03        | 22.12       | 22.75            |
| 3       | 512.2263 | 512.2291 | 5.48       | 5.26    | 4.86         | 3.86        | 3.56             |
| 4       | 513.2273 | 513.2323 | 9.62       | 0.74    | 0.51         | 0.54        | 0.38             |



**3,4-dihydro-6-(3,7-dimethyl-3-vinylocta-1,6-dienyl)-3-(3-nitrophenyl)-2H-benzo[e][1,3]oxazine (9)**

**9- <sup>1</sup>H NMR**

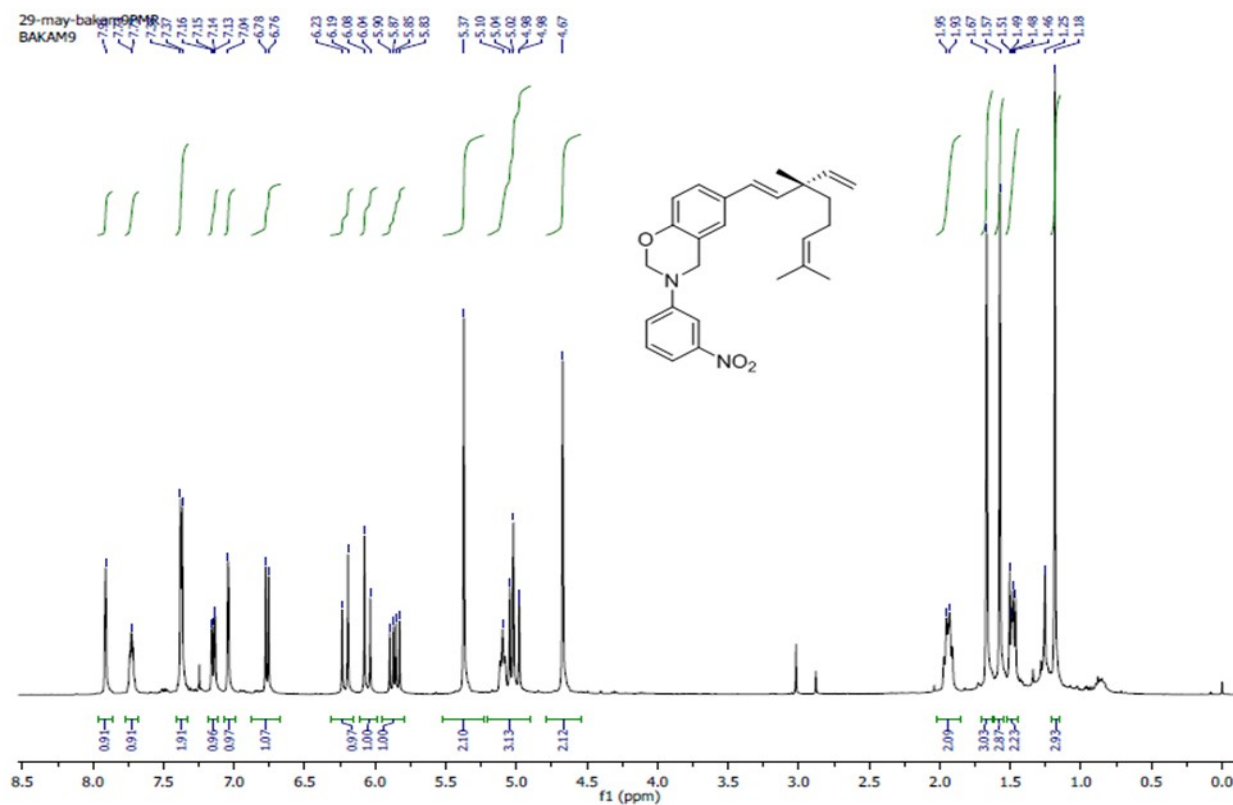

**9- <sup>13</sup>C NMR**

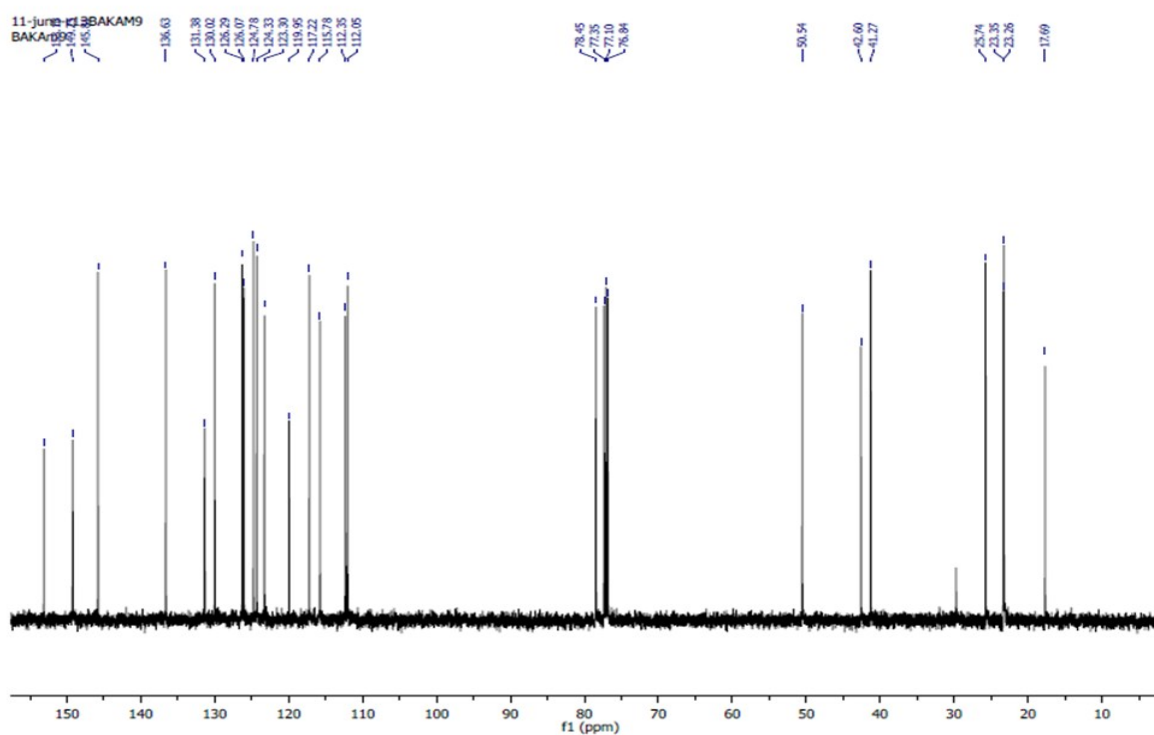

## DEPT-9

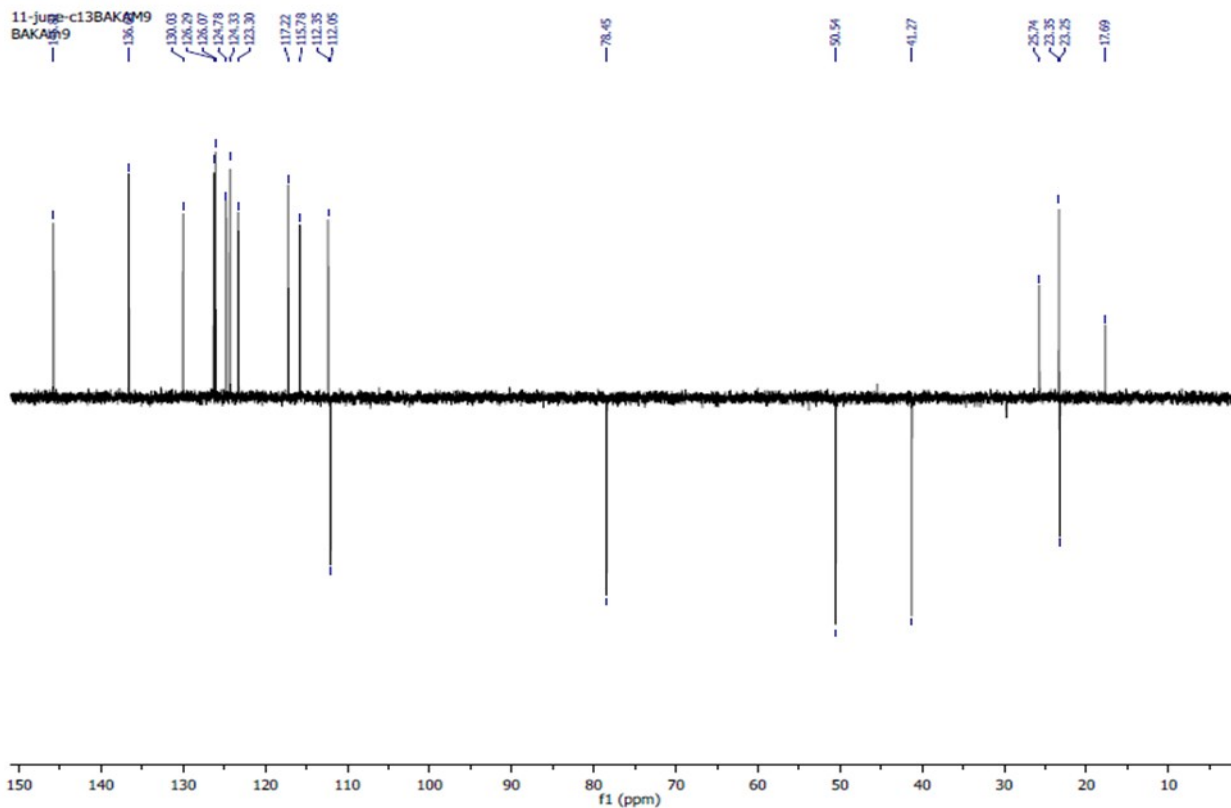

## 9- HRMS

Compound Table

| Compound Label                                                        | RT    | Mass     | Formula                                                       | MFG Formula                                                   | MFG Diff (ppm) | DB Formula                                                    |
|-----------------------------------------------------------------------|-------|----------|---------------------------------------------------------------|---------------------------------------------------------------|----------------|---------------------------------------------------------------|
| Cpd 11: C <sub>26</sub> H <sub>30</sub> N <sub>2</sub> O <sub>3</sub> | 0.264 | 418.2209 | C <sub>26</sub> H <sub>30</sub> N <sub>2</sub> O <sub>3</sub> | C <sub>26</sub> H <sub>30</sub> N <sub>2</sub> O <sub>3</sub> | 11.45          | C <sub>26</sub> H <sub>30</sub> N <sub>2</sub> O <sub>3</sub> |

| Compound Label                                                        | m/z      | RT    | Algorithm                 | Mass     |
|-----------------------------------------------------------------------|----------|-------|---------------------------|----------|
| Cpd 11: C <sub>26</sub> H <sub>30</sub> N <sub>2</sub> O <sub>3</sub> | 419.2297 | 0.264 | Find by Molecular Feature | 418.2209 |

MFE MS Spectrum

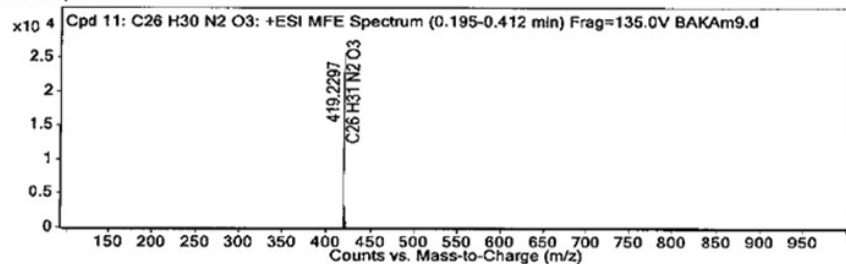

MS Spectrum Peak List

| m/z      | z | Abund    | Formula                                                       | Ion                |
|----------|---|----------|---------------------------------------------------------------|--------------------|
| 419.2297 | 1 | 25620.66 | C <sub>26</sub> H <sub>31</sub> N <sub>2</sub> O <sub>3</sub> | (M+H) <sup>+</sup> |
| 420.233  | 1 | 8251.12  | C <sub>26</sub> H <sub>31</sub> N <sub>2</sub> O <sub>3</sub> | (M+H) <sup>+</sup> |
| 421.2166 | 1 | 3089.11  | C <sub>26</sub> H <sub>31</sub> N <sub>2</sub> O <sub>3</sub> | (M+H) <sup>+</sup> |
| 422.2137 | 1 | 840.94   | C <sub>26</sub> H <sub>31</sub> N <sub>2</sub> O <sub>3</sub> | (M+H) <sup>+</sup> |

Predicted Isotope Match Table

| Isotope | m/z      | Calc m/z | Diff (ppm) | Abund % | Calc Abund % | Abund Sum % | Calc Abund Sum % |
|---------|----------|----------|------------|---------|--------------|-------------|------------------|
| 1       | 419.2297 | 419.2329 | 7.71       | 100     | 100          | 67.92       | 74.27            |
| 2       | 420.233  | 420.2362 | 7.56       | 32.2    | 29.32        | 21.87       | 21.78            |
| 3       | 421.2166 | 421.2391 | 53.36      | 11.74   | 4.76         | 7.98        | 3.54             |
| 4       | 422.2137 | 422.2419 | 66.73      | 3.28    | 0.56         | 2.23        | 0.41             |

**3,4-dihydro-6-(3,7-dimethyl-3-vinylocta-1,6-dienyl)-3-p-tolyl-2H-benzo[e][1,3]oxazine  
(10)**

10 -  $^1\text{H}$  NMR

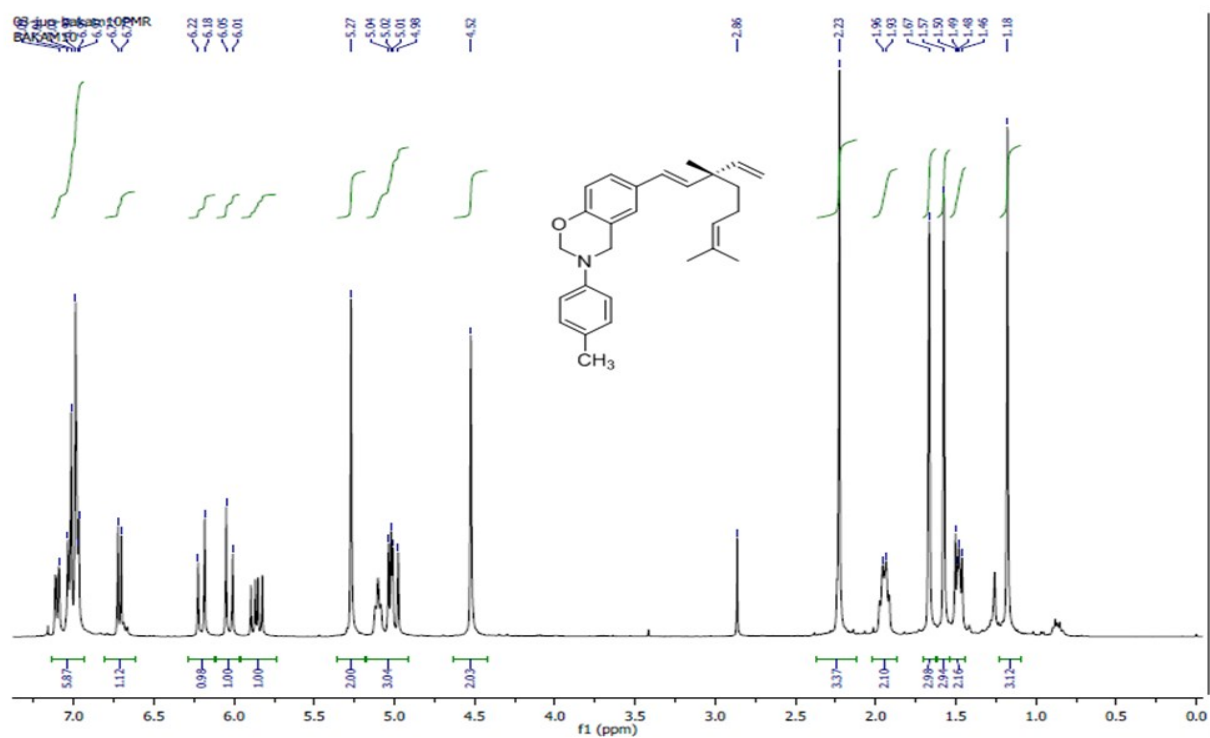

10 -  $^{13}\text{C}$  NMR

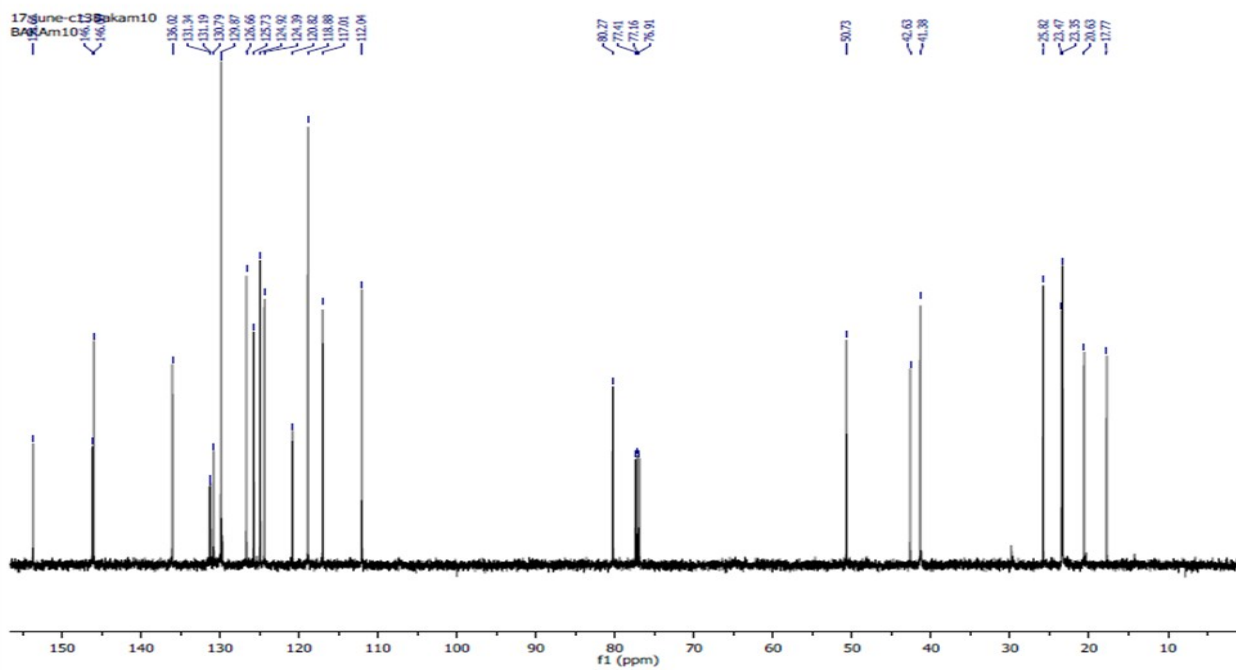

# DEPT-10

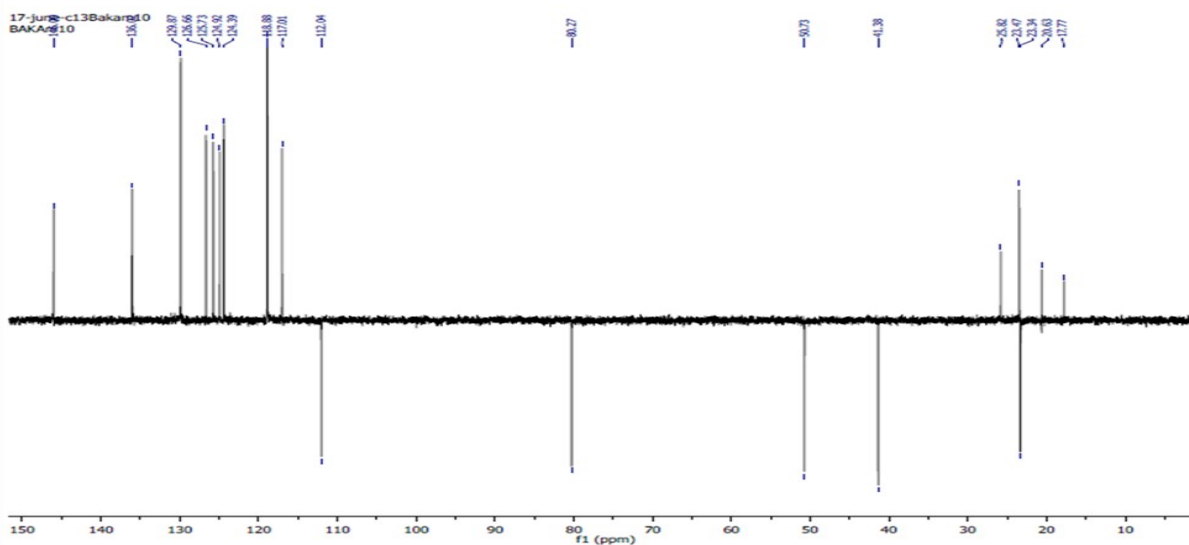

## 10 - HRMS

### Compound Table

| Compound Label                              | RT    | Mass     | Formula                             | MFG Formula                         | MFG Diff (ppm) | DB Formula                          |
|---------------------------------------------|-------|----------|-------------------------------------|-------------------------------------|----------------|-------------------------------------|
| Cpd 13: C <sub>27</sub> H <sub>33</sub> N O | 0.271 | 387.2558 | C <sub>27</sub> H <sub>33</sub> N O | C <sub>27</sub> H <sub>33</sub> N O | 1.03           | C <sub>27</sub> H <sub>33</sub> N O |

| Compound Label                              | m/z      | RT    | Algorithm                 | Mass     |
|---------------------------------------------|----------|-------|---------------------------|----------|
| Cpd 13: C <sub>27</sub> H <sub>33</sub> N O | 388.2629 | 0.271 | Find by Molecular Feature | 387.2558 |

### MFE MS Spectrum

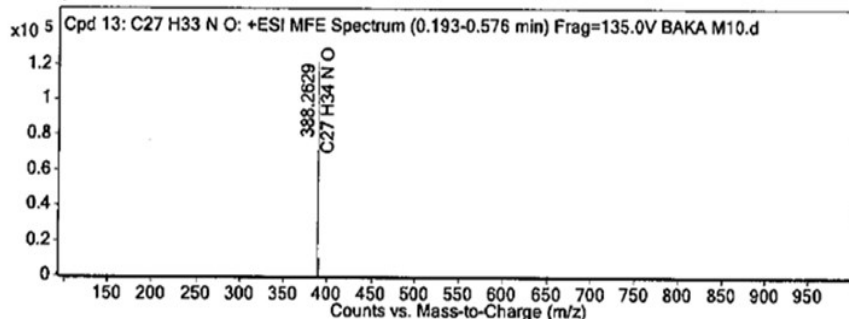

### MS Spectrum Peak List

| m/z      | z | Abund     | Formula                             | Ion                |
|----------|---|-----------|-------------------------------------|--------------------|
| 388.2629 | 1 | 121266.14 | C <sub>27</sub> H <sub>34</sub> N O | (M+H) <sup>+</sup> |
| 389.2659 | 1 | 35055.15  | C <sub>27</sub> H <sub>34</sub> N O | (M+H) <sup>+</sup> |
| 390.2735 | 1 | 10270.61  | C <sub>27</sub> H <sub>34</sub> N O | (M+H) <sup>+</sup> |

### Predicted Isotope Match Table

| Isotope | m/z      | Calc m/z | Diff (ppm) | Abund % | Calc Abund % | Abund Sum % | Calc Abund Sum % |
|---------|----------|----------|------------|---------|--------------|-------------|------------------|
| 1       | 388.2629 | 388.2635 | 1.47       | 100     | 100          | 72.79       | 74.33            |
| 2       | 389.2659 | 389.2668 | 2.43       | 28.91   | 30           | 21.04       | 22.3             |
| 3       | 390.2735 | 390.27   | -8.92      | 8.47    | 4.55         | 6.17        | 3.38             |

**3-(3,4-difluorophenyl)-3,4-dihydro-6-(3,7-dimethyl-3-vinylocta-1,6-dienyl)-2H-benzo[e][1,3]oxazine(11)**

**11 -  $^1\text{H}$ NMR**

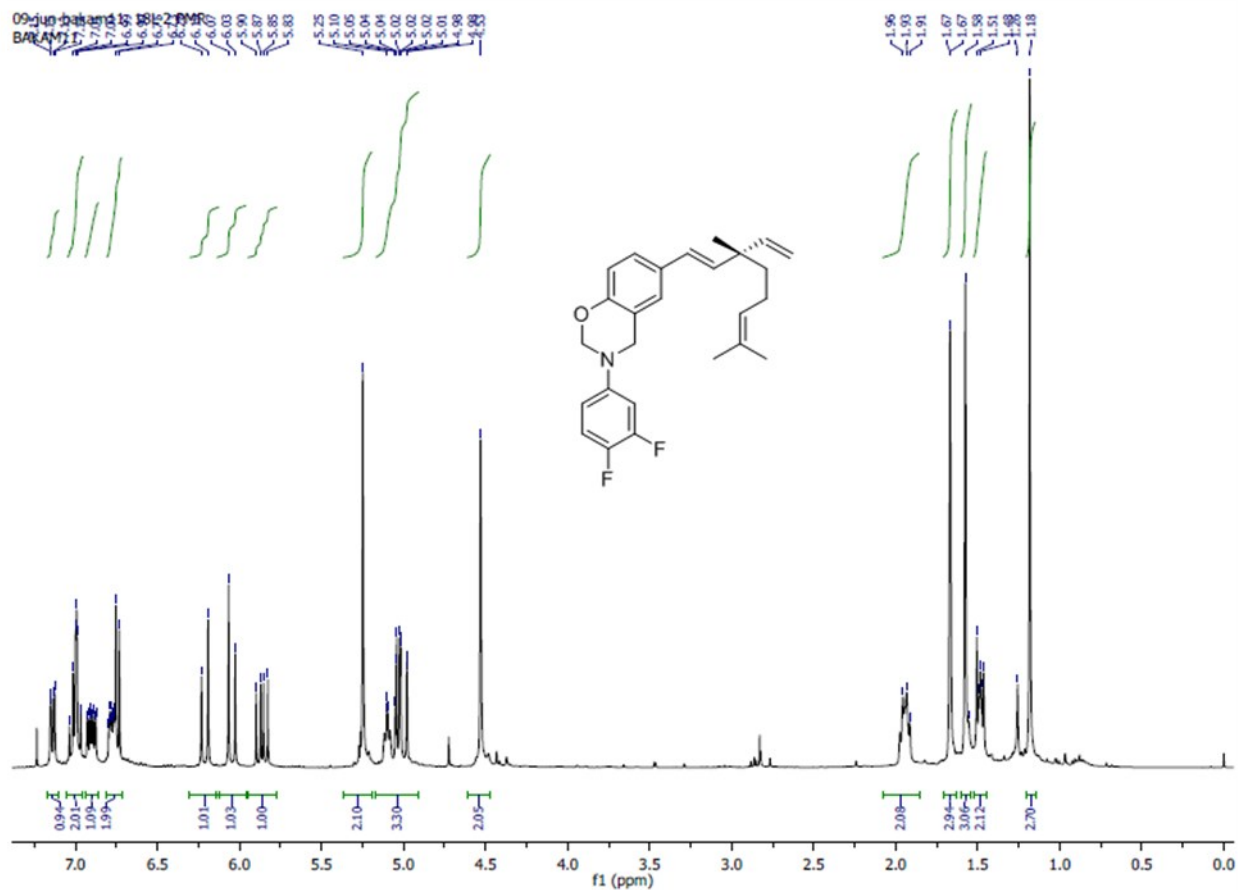

**11 -  $^{13}\text{C}$  NMR**

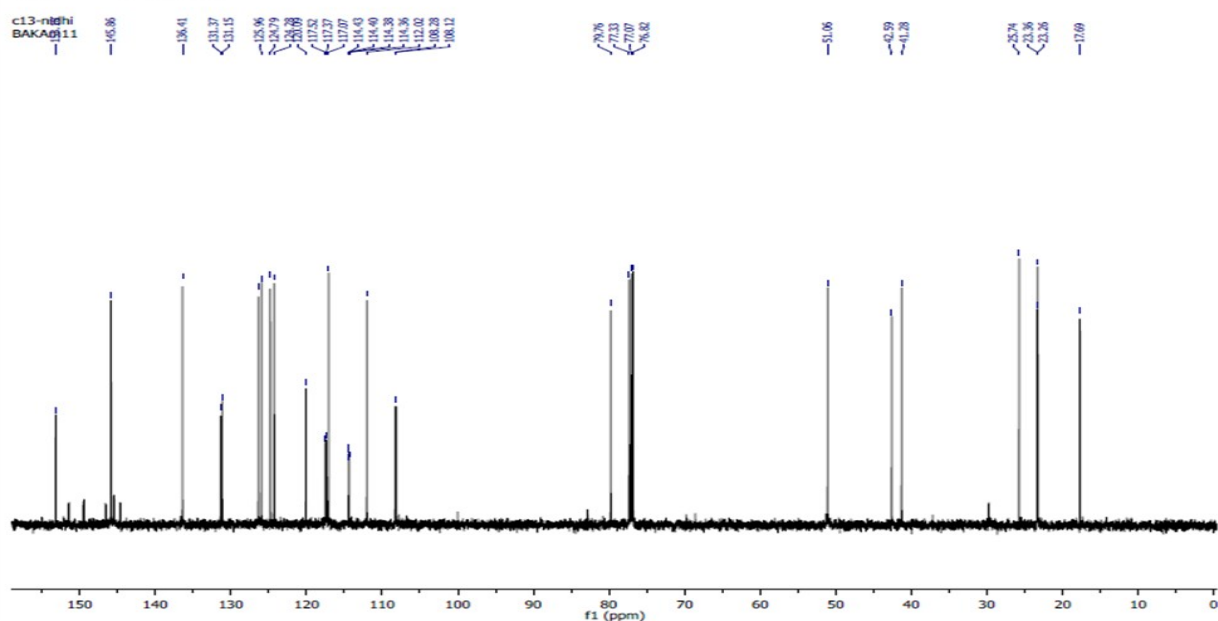

<sup>13</sup>C NMR spectrum (CDCl<sub>3</sub>) of compound 10a. The x-axis represents the chemical shift in ppm, ranging from 0 to 150. The spectrum shows several sharp peaks, with the most prominent ones between 110 and 140 ppm. A cluster of peaks is visible around 125 ppm, and another around 115 ppm. Smaller peaks are present at approximately 100, 80, 50, 40, 25, and 18 ppm. The solvent peak for CDCl<sub>3</sub> is visible at 77.0 ppm.

### Compound Table

| Compound Label         | RT    | Mass    | Formula        | MFG Formula    | MFG Diff (ppm) | DB Formula     |
|------------------------|-------|---------|----------------|----------------|----------------|----------------|
| Cpd 51: C26 H29 F2 N O | 0.268 | 409.222 | C26 H29 F2 N O | C26 H29 F2 N O | -0.76          | C26 H29 F2 N O |

| Compound Label         | m/z      | RT    | Algorithm                 | Mass    |
|------------------------|----------|-------|---------------------------|---------|
| Cpd 51: C26 H29 F2 N O | 410.2288 | 0.268 | Find by Molecular Feature | 409.222 |

Cond 51: C26 H29 F2 N O: +ESI MFE Spectrum (0.201-0.484 min) Erag=135.0V BAKAm11.d

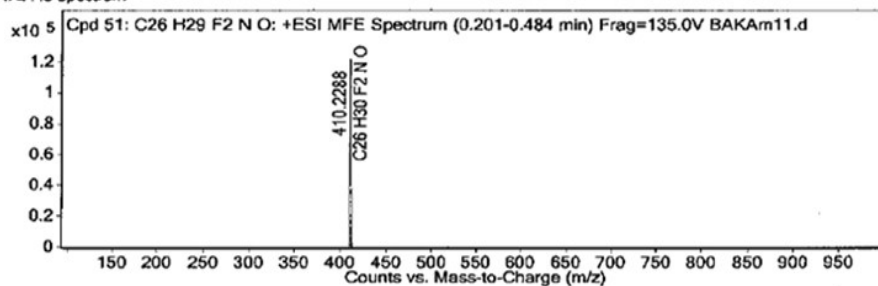

| <i>m/z</i> | <i>z</i> | Abund     | Formula        | Ion                |
|------------|----------|-----------|----------------|--------------------|
| 410.2288   | 1        | 121927.48 | C26 H30 F2 N O | (M+H) <sup>+</sup> |
| 411.232    | 1        | 38612.93  | C26 H30 F2 N O | (M+H) <sup>+</sup> |
| 412.2403   | 1        | 12537.41  | C26 H30 F2 N O | (M+H) <sup>+</sup> |
| 413.2483   | 1        | 2704.3    | C26 H30 F2 N O | (M+H) <sup>+</sup> |
| 414.2654   | 1        | 181.54    | C26 H30 F2 N O | (M+H) <sup>+</sup> |

| Isotope | m/z      | Calc m/z | Diff (ppm) | Abund % | Calc Abund % | Abund Sum % | Calc Abund Sum % |
|---------|----------|----------|------------|---------|--------------|-------------|------------------|
| 1       | 410.2288 | 410.229  | 0.4        | 100     | 100          | 69.29       | 74.89            |
| 2       | 411.232  | 411.2323 | 0.71       | 31.67   | 28.87        | 21.94       | 21.62            |
| 3       | 412.2403 | 412.2355 | -11.53     | 10.28   | 4.22         | 7.13        | 3.16             |
| 4       | 413.2483 | 413.2386 | -23.45     | 2.22    | 0.42         | 1.54        | 0.31             |
| 5       | 414.2654 | 414.2416 | -57.33     | 0.15    | 0.03         | 0.1         | 0.02             |

# **3-butyl-3,4-dihydro-6-(3,7-dimethyl-3-vinylocta-1,6-dienyl)-2H-benzo[e][1,3]oxazine (12)**

## **12 - $^1\text{H}$ NMR**

15-jun-18L-5, BAKAm 12PMR  
BAKAm12

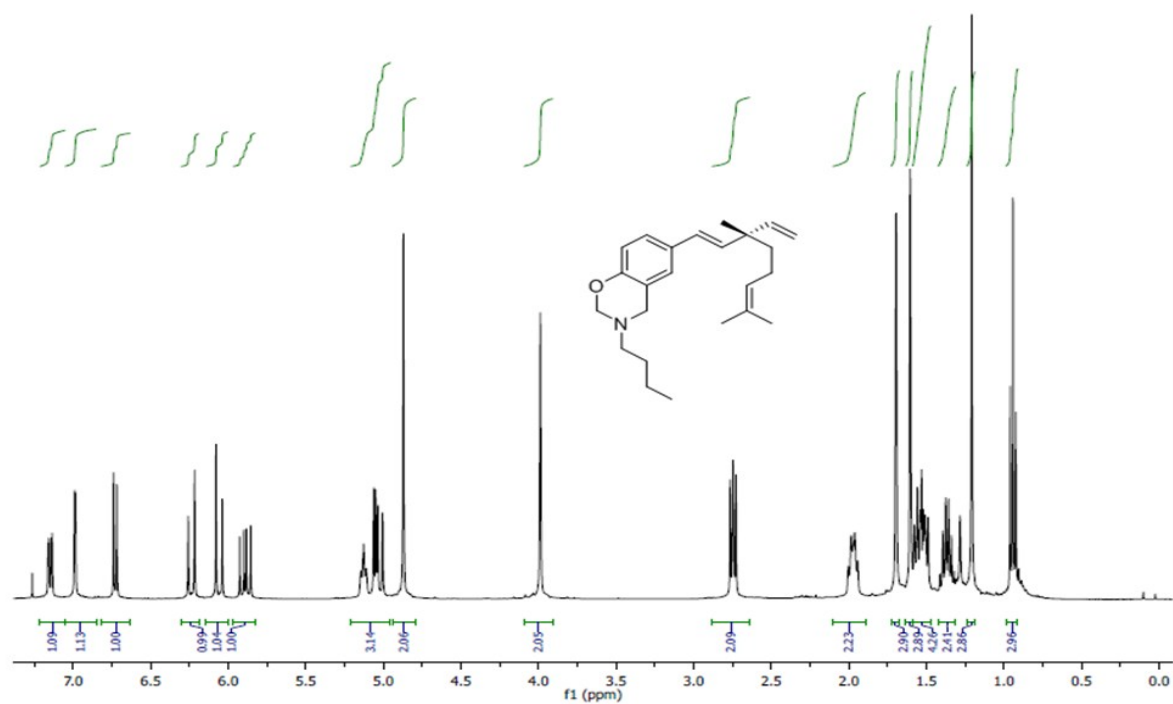

## **12 - $^{13}\text{C}$ NMR**

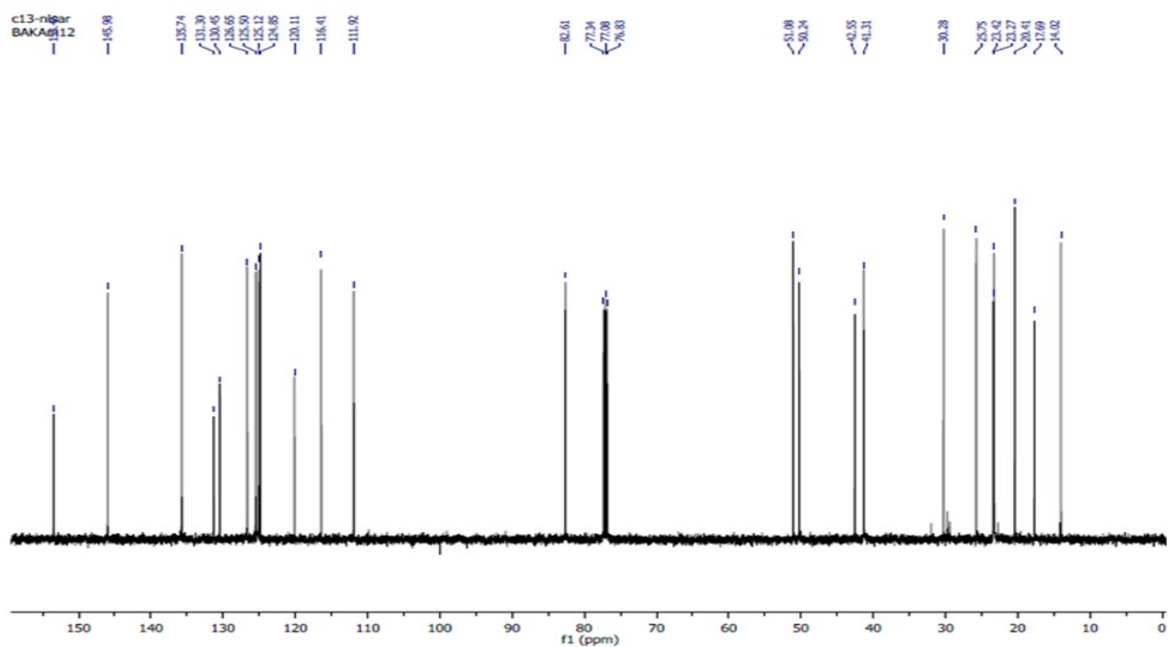



## DEPT-12

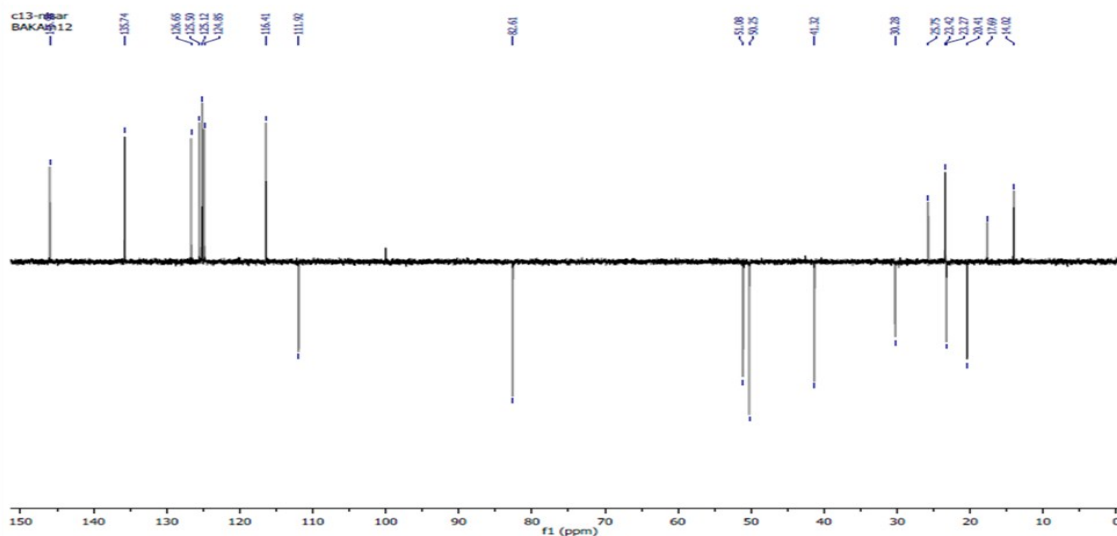

## 12-HRMS

## Compound Table

| Compound Label                              | RT    | Mass   | Formula                             | MFG Formula                         | MFG Diff (ppm) | DB Formula                          |
|---------------------------------------------|-------|--------|-------------------------------------|-------------------------------------|----------------|-------------------------------------|
| Cpd 11: C <sub>24</sub> H <sub>35</sub> N O | 0.264 | 353.27 | C <sub>24</sub> H <sub>35</sub> N O | C <sub>24</sub> H <sub>35</sub> N O | 5.23           | C <sub>24</sub> H <sub>35</sub> N O |

| Compound Label                              | m/z      | RT    | Algorithm                 | Mass   |
|---------------------------------------------|----------|-------|---------------------------|--------|
| Cpd 11: C <sub>24</sub> H <sub>35</sub> N O | 354.2776 | 0.264 | Find by Molecular Feature | 353.27 |

## MFE MS Spectrum

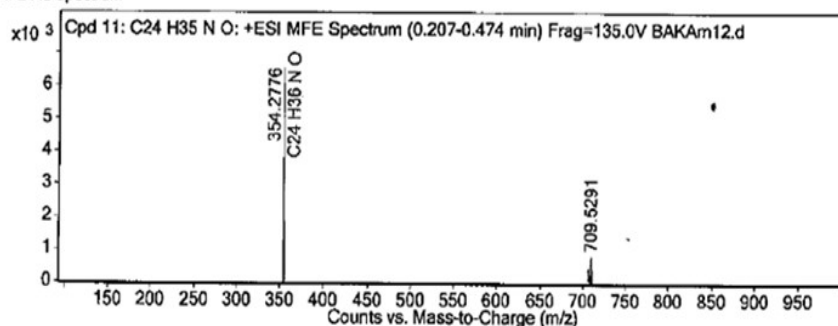

## MS Spectrum Peak List

| m/z      | z | Abund   | Formula                             | Ion                 |
|----------|---|---------|-------------------------------------|---------------------|
| 354.2776 | 1 | 6563.48 | C <sub>24</sub> H <sub>36</sub> N O | (M+H) <sup>+</sup>  |
| 355.2794 | 1 | 1854.37 | C <sub>24</sub> H <sub>36</sub> N O | (M+H) <sup>+</sup>  |
| 707.5488 | 1 | 448.81  |                                     | (2M+H) <sup>+</sup> |
| 708.5362 | 1 | 244.92  |                                     | (2M+H) <sup>+</sup> |
| 709.5291 | 1 | 811.65  |                                     | (2M+H) <sup>+</sup> |
| 710.5318 | 1 | 409.94  |                                     | (2M+H) <sup>+</sup> |

## Predicted Isotope Match Table

| Isotope | m/z      | Calc m/z | Diff (ppm) | Abund % | Calc Abund % | Abund Sum % | Calc Abund Sum % |
|---------|----------|----------|------------|---------|--------------|-------------|------------------|
| 1       | 354.2776 | 354.2791 | 4.28       | 100     | 100          | 77.97       | 78.88            |
| 2       | 355.2794 | 355.2825 | 8.49       | 28.25   | 26.78        | 22.03       | 21.12            |



**3-heptyl-3,4-dihydro-6-(3,7-dimethyl-3-vinylocta-1,6-dienyl)-2H-benzo[e][1,3]oxazine (13).**

**13-<sup>1</sup>H NMR**

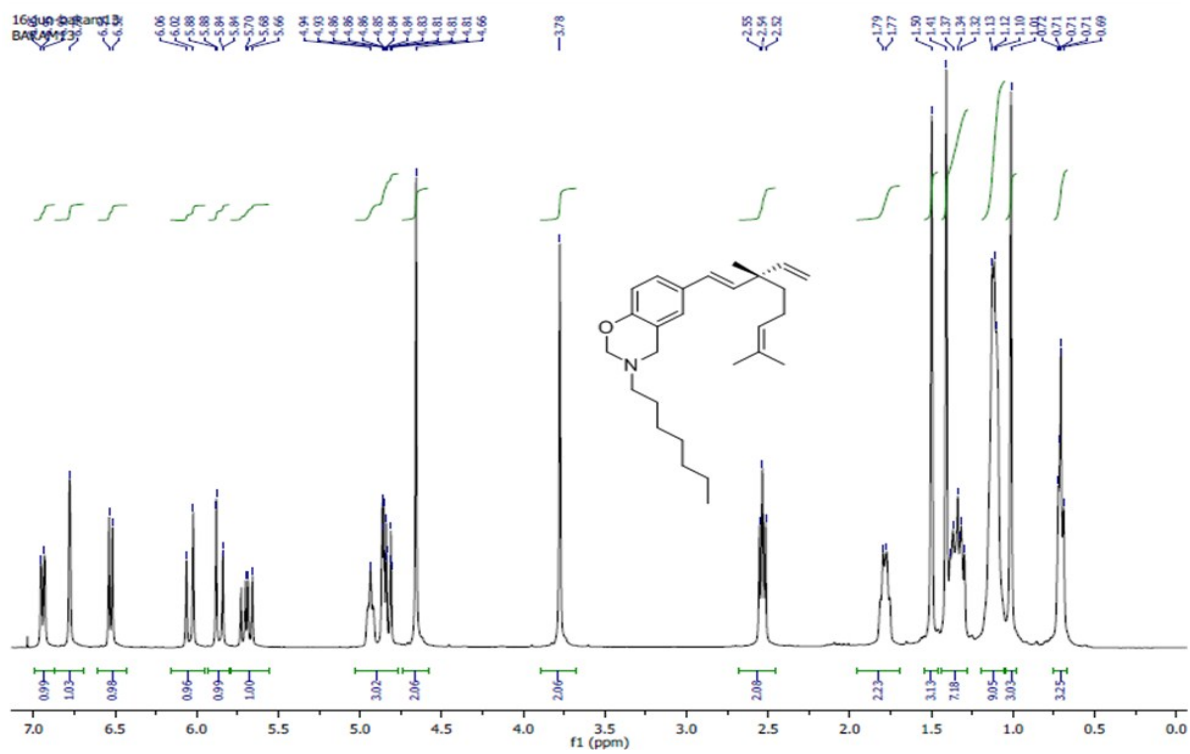

**13-<sup>13</sup>C NMR**

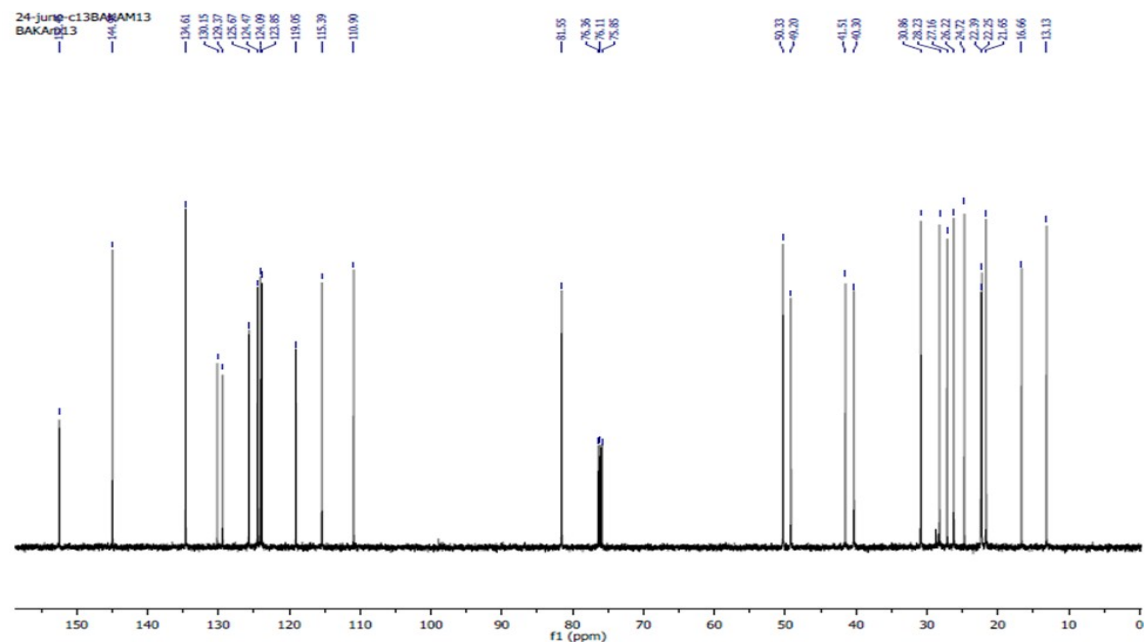

# DEPT-13

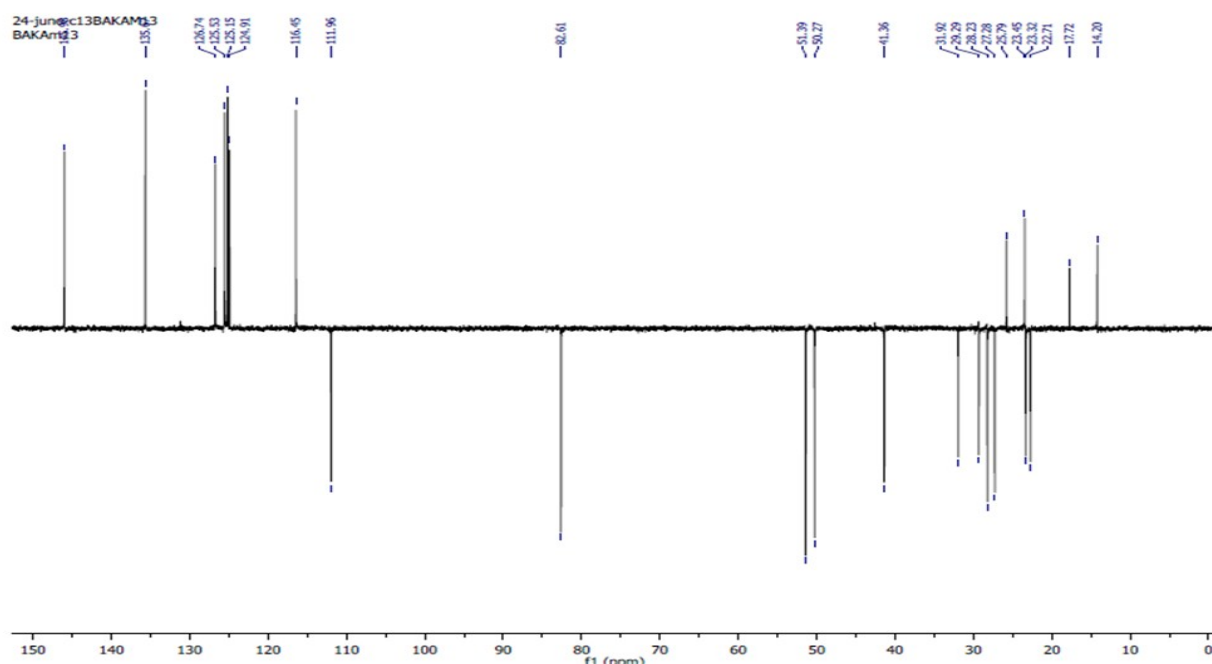

## 13-HRMS

### Compound Table

| Compound Label                              | RT    | Mass     | Formula                             | MFG Formula                         | MFG Diff (ppm) | DB Formula                          |
|---------------------------------------------|-------|----------|-------------------------------------|-------------------------------------|----------------|-------------------------------------|
| Cpd 16: C <sub>27</sub> H <sub>41</sub> N O | 0.267 | 395.3162 | C <sub>27</sub> H <sub>41</sub> N O | C <sub>27</sub> H <sub>41</sub> N O | 6.74           | C <sub>27</sub> H <sub>41</sub> N O |

| Compound Label                              | m/z      | RT    | Algorithm                 | Mass     |
|---------------------------------------------|----------|-------|---------------------------|----------|
| Cpd 16: C <sub>27</sub> H <sub>41</sub> N O | 396.3233 | 0.267 | Find by Molecular Feature | 395.3162 |

### MFE MS Spectrum

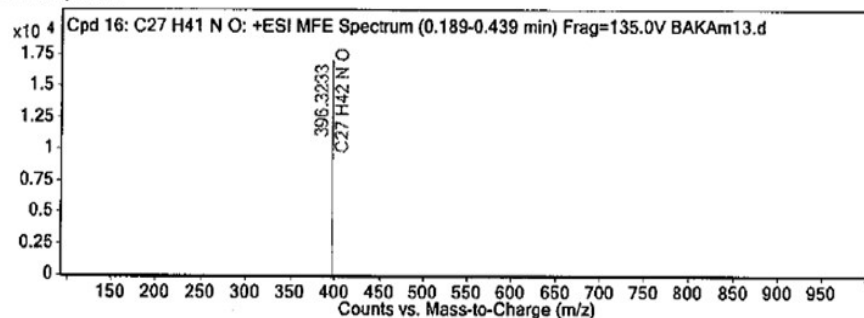

### MS Spectrum Peak List

| m/z      | z | Abund    | Formula                             | Ion                |
|----------|---|----------|-------------------------------------|--------------------|
| 396.3233 | 1 | 16942.43 | C <sub>27</sub> H <sub>42</sub> N O | (M+H) <sup>+</sup> |
| 397.3271 | 1 | 4689.58  | C <sub>27</sub> H <sub>42</sub> N O | (M+H) <sup>+</sup> |

### Predicted Isotope Match Table

| Isotope | m/z      | Calc m/z | Diff (ppm) | Abund % | Calc Abund % | Abund Sum % | Calc Abund Sum % |
|---------|----------|----------|------------|---------|--------------|-------------|------------------|
| 1       | 396.3233 | 396.3261 | 6.99       | 100     | 100          | 78.32       | 76.87            |
| 2       | 397.3271 | 397.3294 | 5.74       | 27.68   | 30.09        | 21.68       | 23.13            |

**3,4-dihydro-3-methyl-6-(3,7-dimethyl-3-vinylocta-16-dienyl)-2H-benzo[e][1,3]oxazine (14).**

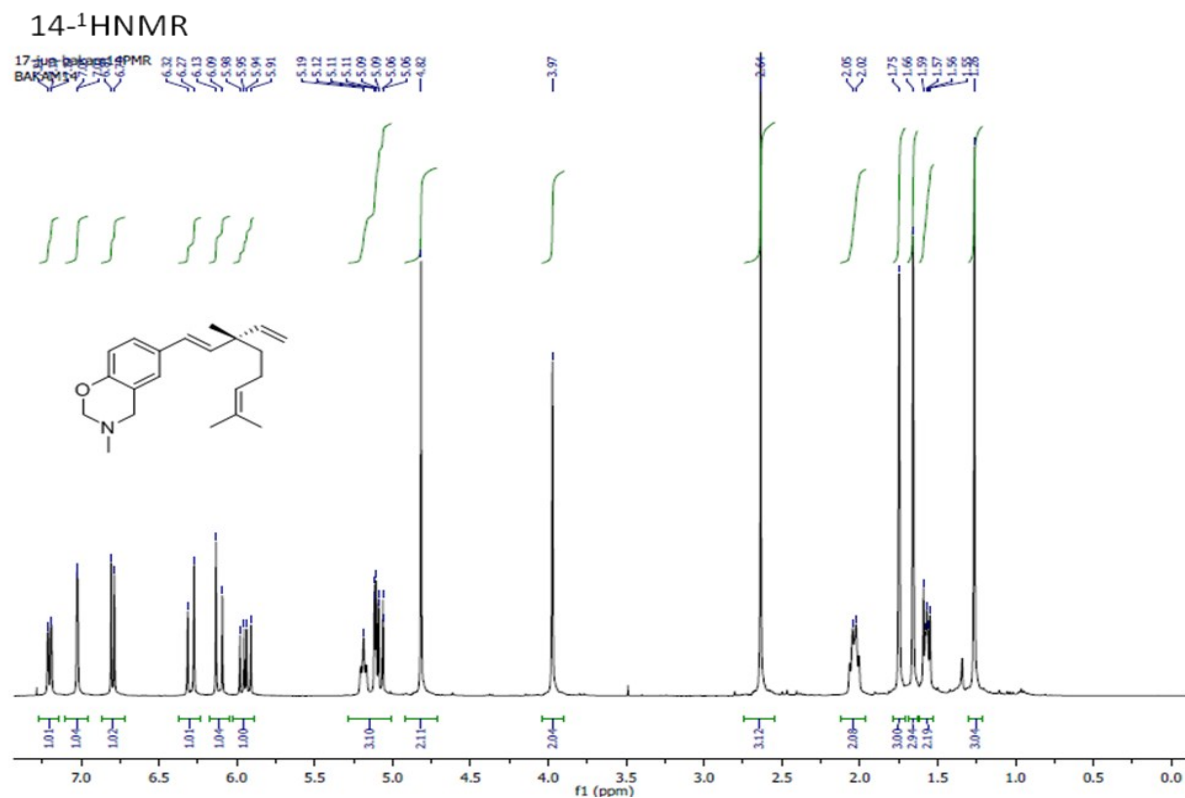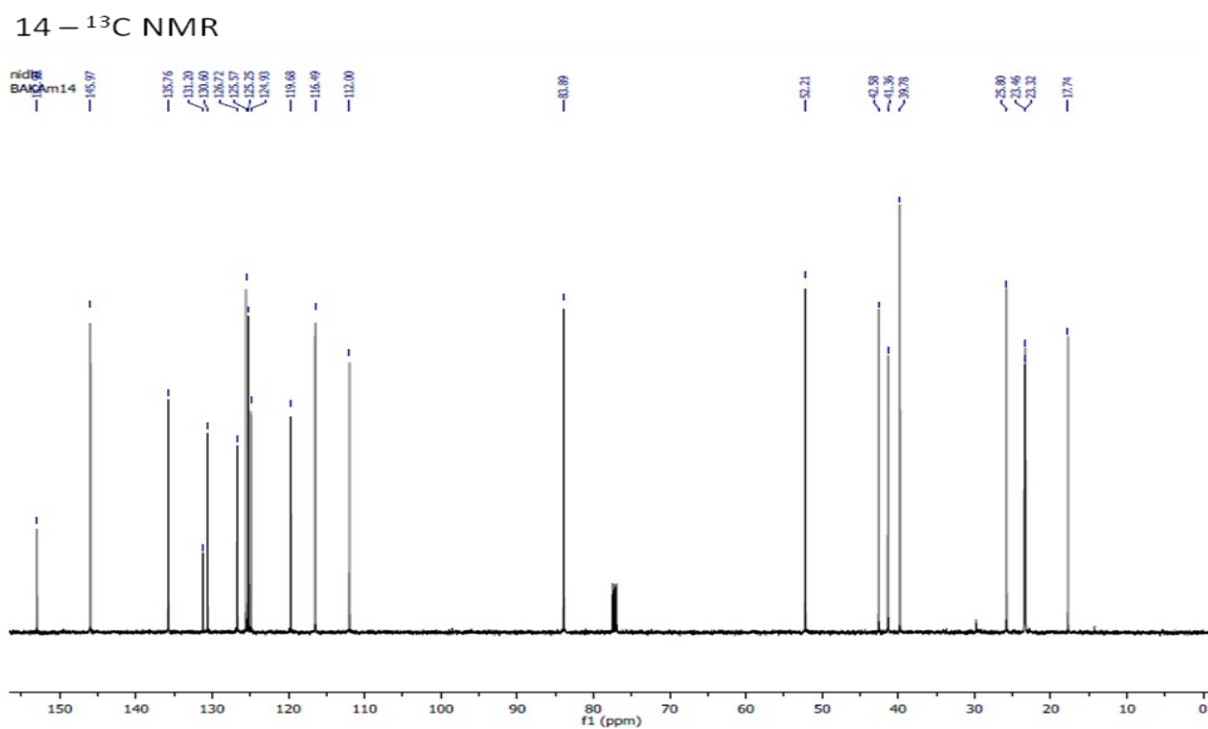

## DEPT-14

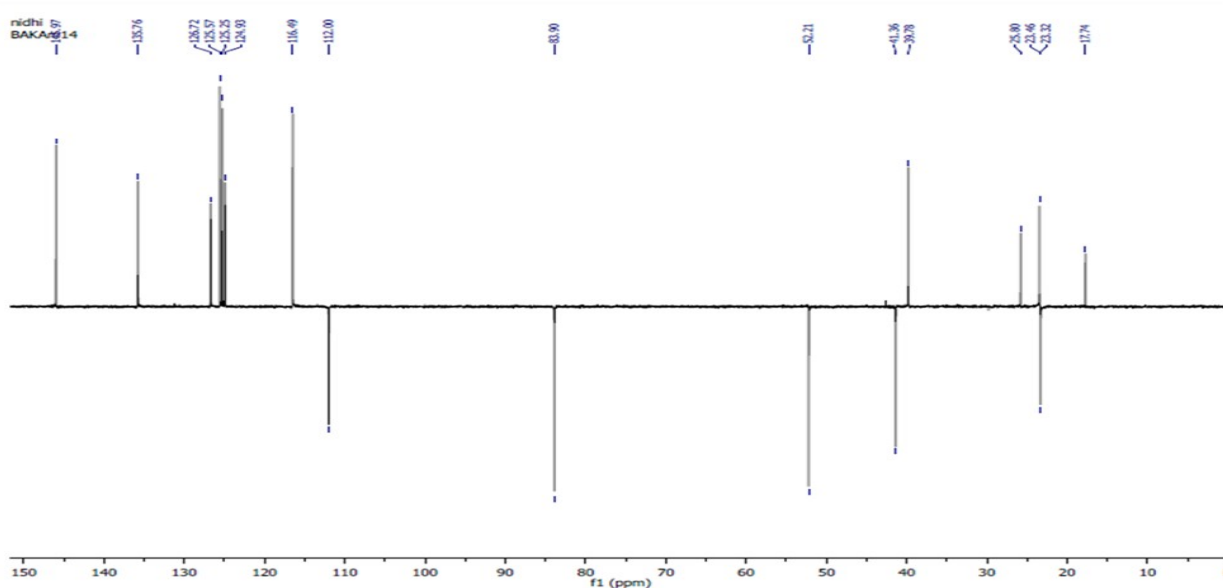

## 14-HRMS

## Compound Table

| Compound Label                             | RT    | Mass     | Formula                             | MFG Formula                         | MFG Diff (ppm) | DB Formula                          |
|--------------------------------------------|-------|----------|-------------------------------------|-------------------------------------|----------------|-------------------------------------|
| Cpd 9: C <sub>21</sub> H <sub>29</sub> N O | 0.268 | 311.2243 | C <sub>21</sub> H <sub>29</sub> N O | C <sub>21</sub> H <sub>29</sub> N O | 1.96           | C <sub>21</sub> H <sub>29</sub> N O |

| Compound Label                             | m/z      | RT    | Algorithm                 | Mass     |
|--------------------------------------------|----------|-------|---------------------------|----------|
| Cpd 9: C <sub>21</sub> H <sub>29</sub> N O | 312.2317 | 0.268 | Find by Molecular Feature | 311.2243 |

## MFE MS Spectrum

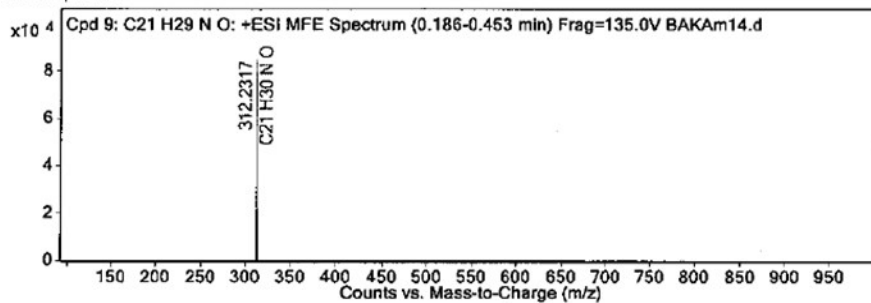

## MS Spectrum Peak List

| m/z      | z | Abund    | Formula                             | Ion                |
|----------|---|----------|-------------------------------------|--------------------|
| 312.2317 | 1 | 84580.12 | C <sub>21</sub> H <sub>30</sub> N O | (M+H) <sup>+</sup> |
| 313.235  | 1 | 21718.47 | C <sub>21</sub> H <sub>30</sub> N O | (M+H) <sup>+</sup> |
| 314.2348 | 1 | 4493.36  | C <sub>21</sub> H <sub>30</sub> N O | (M+H) <sup>+</sup> |

## Predicted Isotope Match Table

| Isotope | m/z      | Calc m/z | Diff (ppm) | Abund % | Calc Abund % | Abund Sum % | Calc Abund Sum % |
|---------|----------|----------|------------|---------|--------------|-------------|------------------|
| 1       | 312.2317 | 312.2322 | 1.5        | 100     | 100          | 76.34       | 79.18            |
| 2       | 313.235  | 313.2355 | 1.57       | 25.68   | 23.46        | 19.6        | 18.58            |
| 3       | 314.2348 | 314.2386 | 12.21      | 5.31    | 2.83         | 4.06        | 2.24             |

### 3,4-dihydro-6-(3,7-dimethyl-3-vinylocta-1,6-dienyl)-3-octyl-2H-benzo[e][1,3]oxazine (15)

#### 15-<sup>1</sup>H NMR

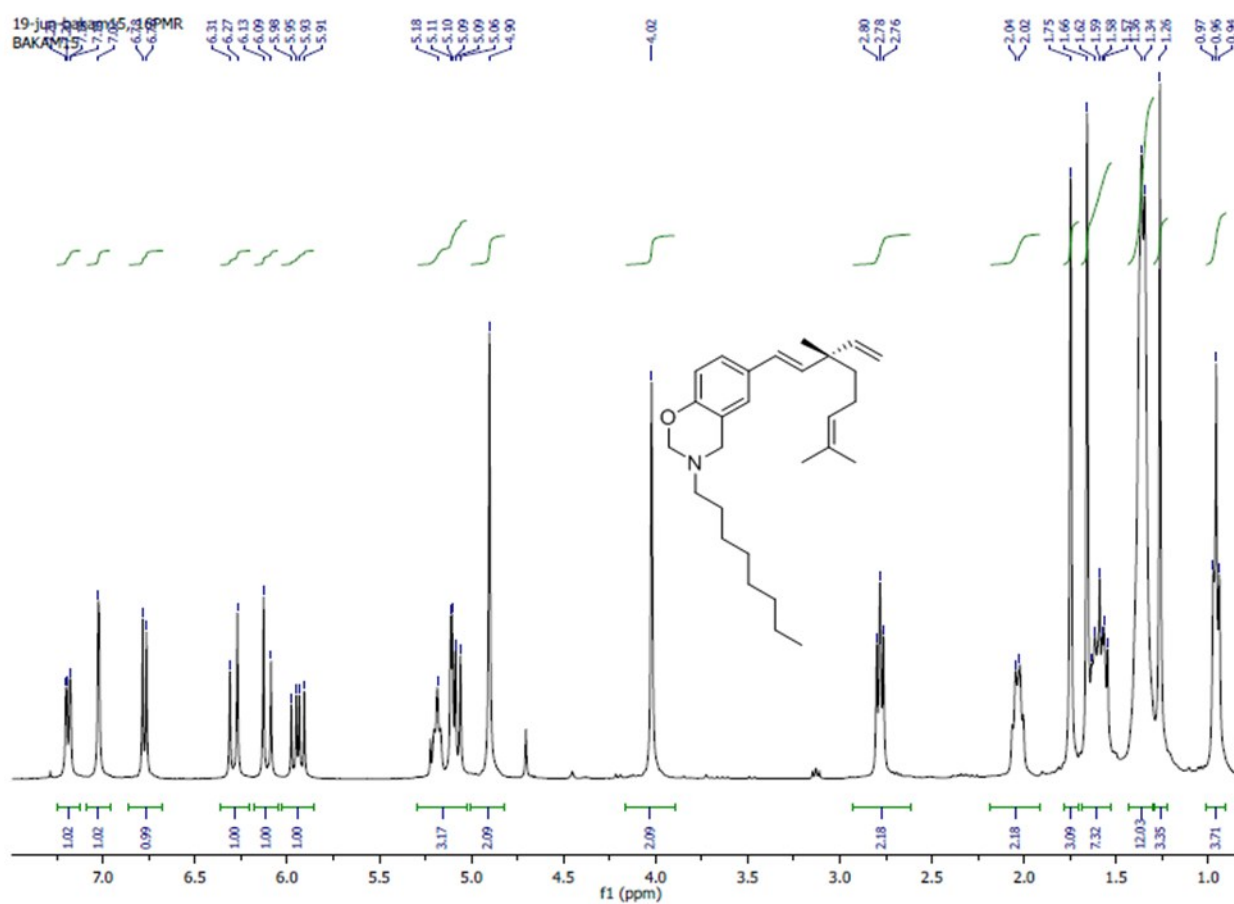

#### 15-<sup>13</sup>C NMR

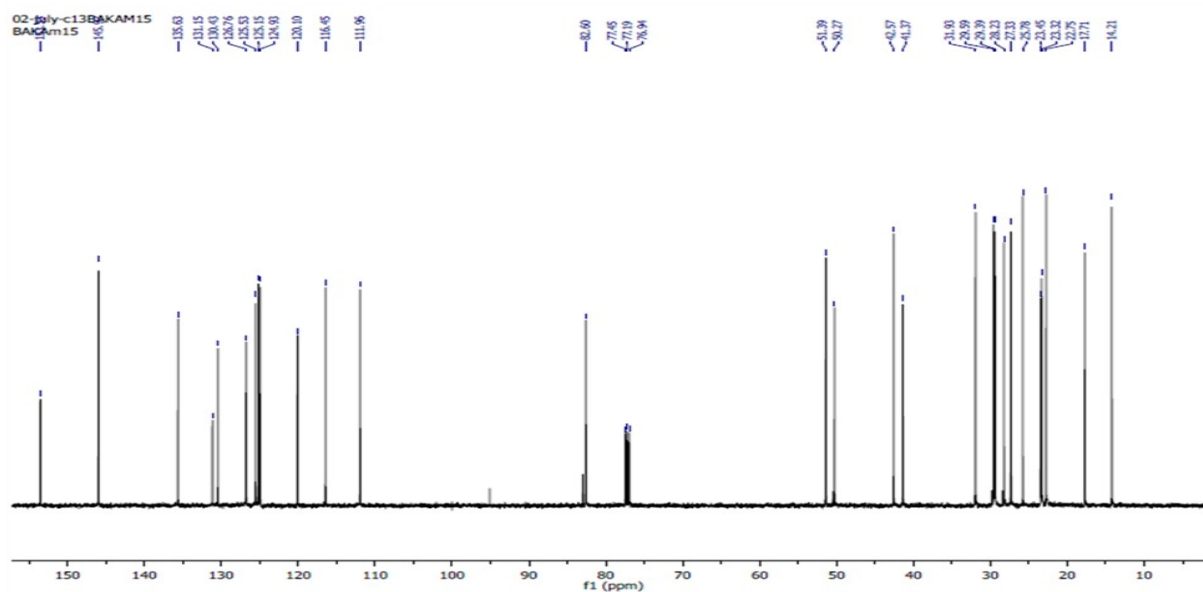

# DEPT-15

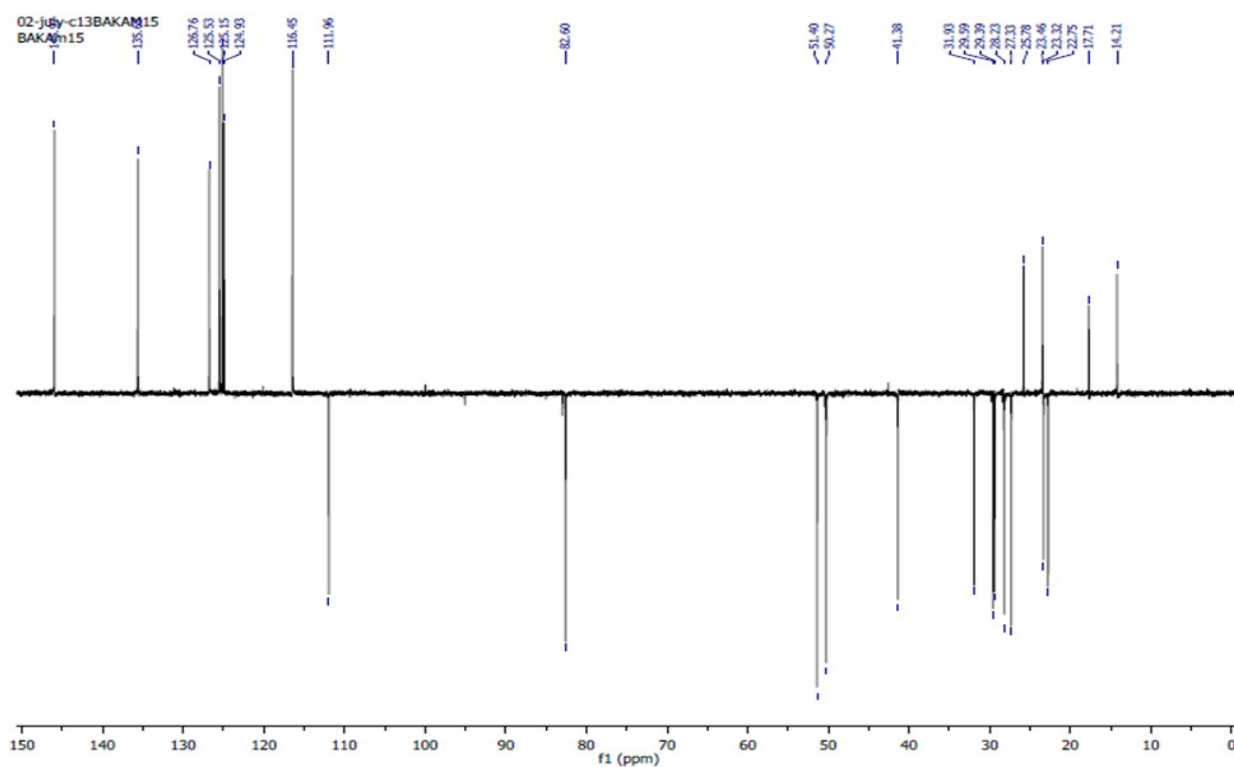

## 15-HRMS

### Compound Table

| Compound Label                             | RT    | Mass     | Formula                             | MFG Formula                         | MFG Diff (ppm) | DB Formula                          |
|--------------------------------------------|-------|----------|-------------------------------------|-------------------------------------|----------------|-------------------------------------|
| Cpd 8: C <sub>28</sub> H <sub>43</sub> N O | 0.262 | 409.3299 | C <sub>28</sub> H <sub>43</sub> N O | C <sub>28</sub> H <sub>43</sub> N O | 11.24          | C <sub>28</sub> H <sub>43</sub> N O |

| Compound Label                             | m/z      | RT    | Algorithm                 | Mass     |
|--------------------------------------------|----------|-------|---------------------------|----------|
| Cpd 8: C <sub>28</sub> H <sub>43</sub> N O | 410.3377 | 0.262 | Find by Molecular Feature | 409.3299 |

### MFE MS Spectrum

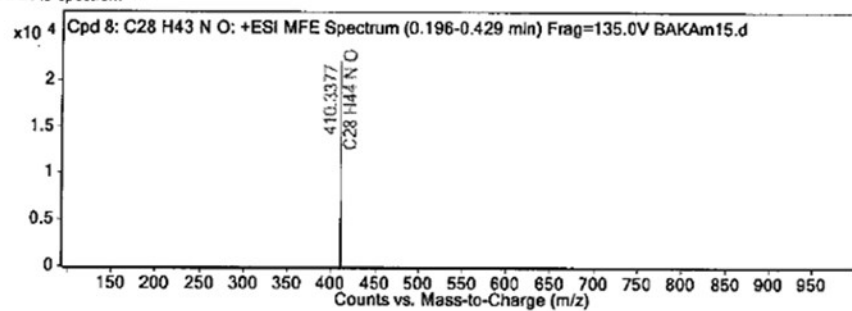

### MS Spectrum Peak List

| m/z      | z | Abund    | Formula                             | Ion                |
|----------|---|----------|-------------------------------------|--------------------|
| 410.3377 | 1 | 22054.04 | C <sub>28</sub> H <sub>44</sub> N O | (M+H) <sup>+</sup> |
| 411.3386 | 1 | 6941.43  | C <sub>28</sub> H <sub>44</sub> N O | (M+H) <sup>+</sup> |

### Predicted Isotope Match Table

| Isotope | m/z      | Calc m/z | Diff (ppm) | Abund % | Calc Abund % | Abund Sum % | Calc Abund Sum % |
|---------|----------|----------|------------|---------|--------------|-------------|------------------|
| 1       | 410.3377 | 410.3417 | 9.82       | 100     | 100          | 76.06       | 76.22            |
| 2       | 411.3386 | 411.3451 | 15.61      | 31.47   | 31.19        | 23.94       | 23.78            |

**3,4-dihydro-6-(3,7-dimethyl-3-vinylocta-1,6-dienyl)-3propyl-2H-benzo[e][1,3]oxazine (16).**

**16-<sup>1</sup>H NMR**

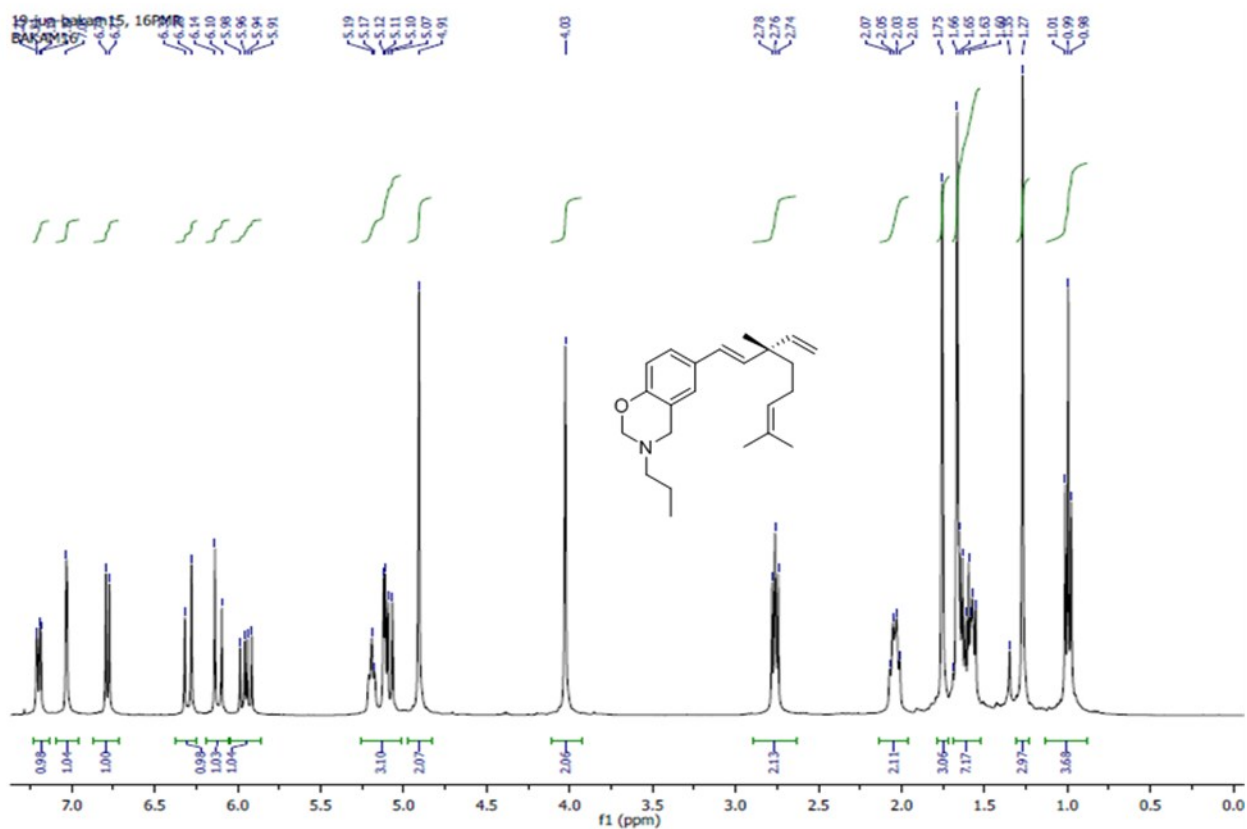

**16 – <sup>13</sup>C NMR**

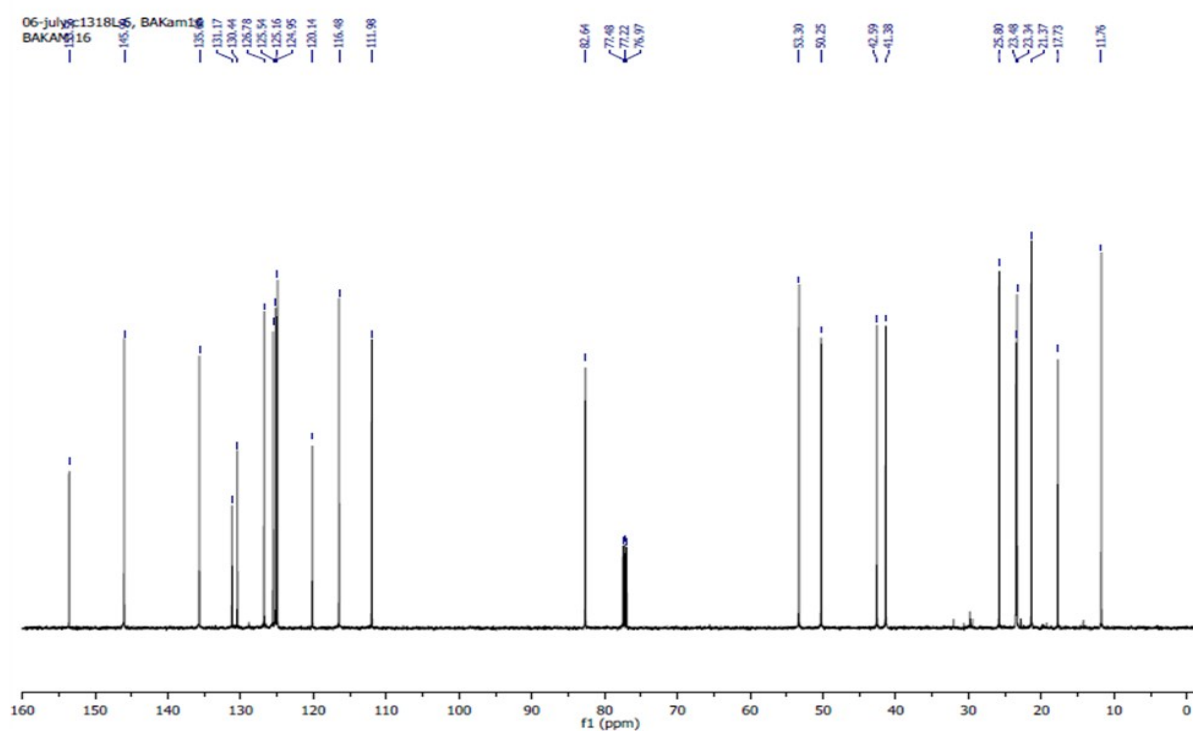



## DEPT-16

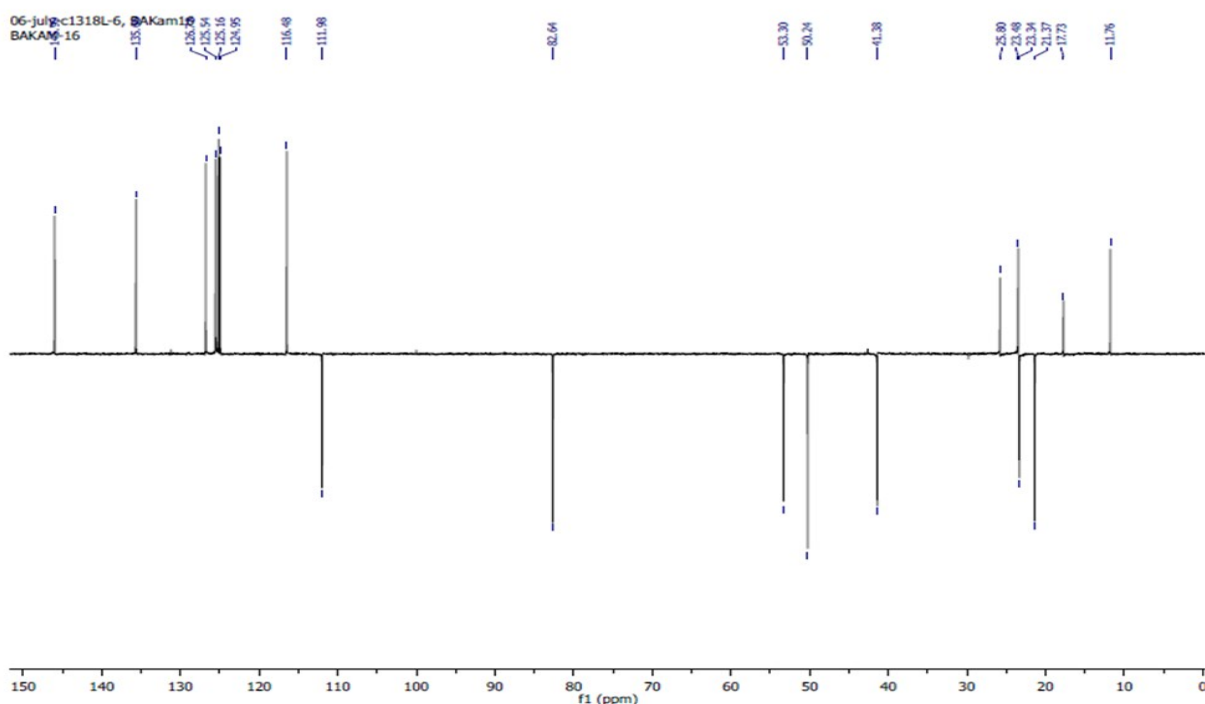

## 16-HRMS

## Compound Table

| Compound Label     | RT    | Mass     | Formula     | MFG Formula | MFG Diff (ppm) | DB Formula  |
|--------------------|-------|----------|-------------|-------------|----------------|-------------|
| Cpd 6: C23 H33 N O | 0.255 | 339.2565 | C23 H33 N O | C23 H33 N O | -0.88          | C23 H33 N O |

| Compound Label     | m/z     | RT    | Algorithm                 | Mass     |
|--------------------|---------|-------|---------------------------|----------|
| Cpd 6: C23 H33 N O | 340.264 | 0.255 | Find by Molecular Feature | 339.2565 |

## MFE MS Spectrum

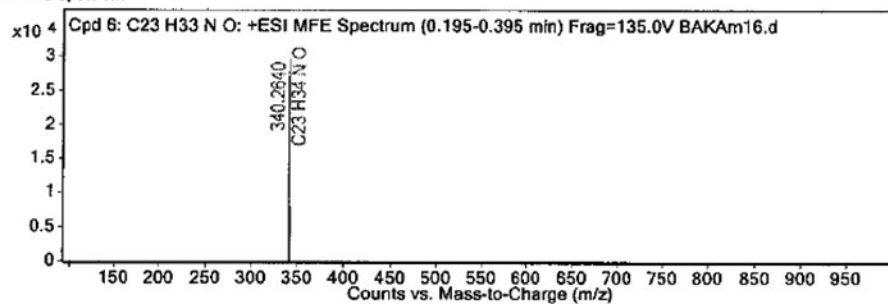

## MS Spectrum Peak List

| m/z      | z | Abund    | Formula     | Ion    |
|----------|---|----------|-------------|--------|
| 340.264  | 1 | 29639.15 | C23 H34 N O | (M+H)+ |
| 341.2665 | 1 | 8112.12  | C23 H34 N O | (M+H)+ |

## Predicted Isotope Match Table

| Isotope | m/z      | Calc m/z | Diff (ppm) | Abund % | Calc Abund % | Abund Sum % | Calc Abund Sum % |
|---------|----------|----------|------------|---------|--------------|-------------|------------------|
| 1       | 340.264  | 340.2635 | -1.37      | 100     | 100          | 78.51       | 79.57            |
| 2       | 341.2665 | 341.2668 | 0.94       | 27.37   | 25.67        | 21.49       | 20.43            |



**3-cyclohexyl-3,4-dihydro-6-(3,7-dimethyl-3-vinylocta-1,6-dienyl)-2H-benzo[e][1,3]oxazine(17)**

**17-<sup>1</sup>H NMR**

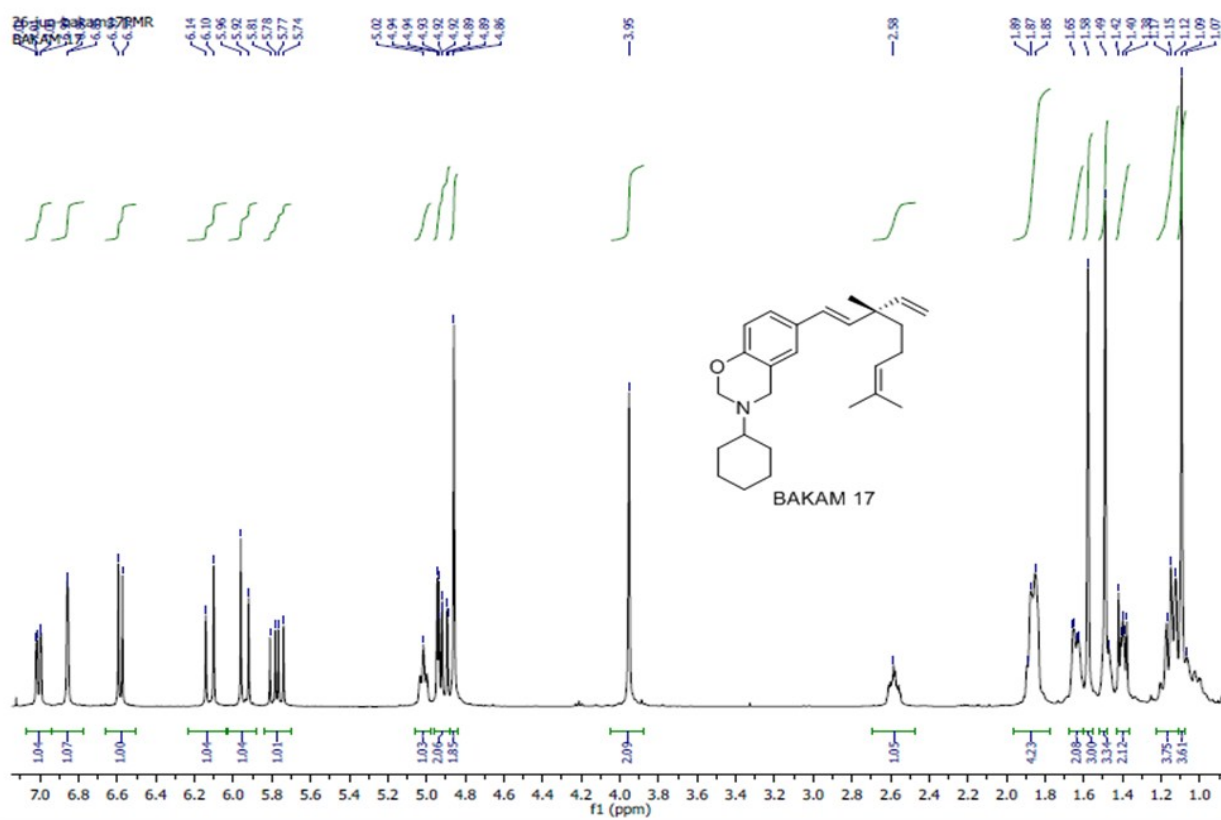

**17 – <sup>13</sup>C NMR**

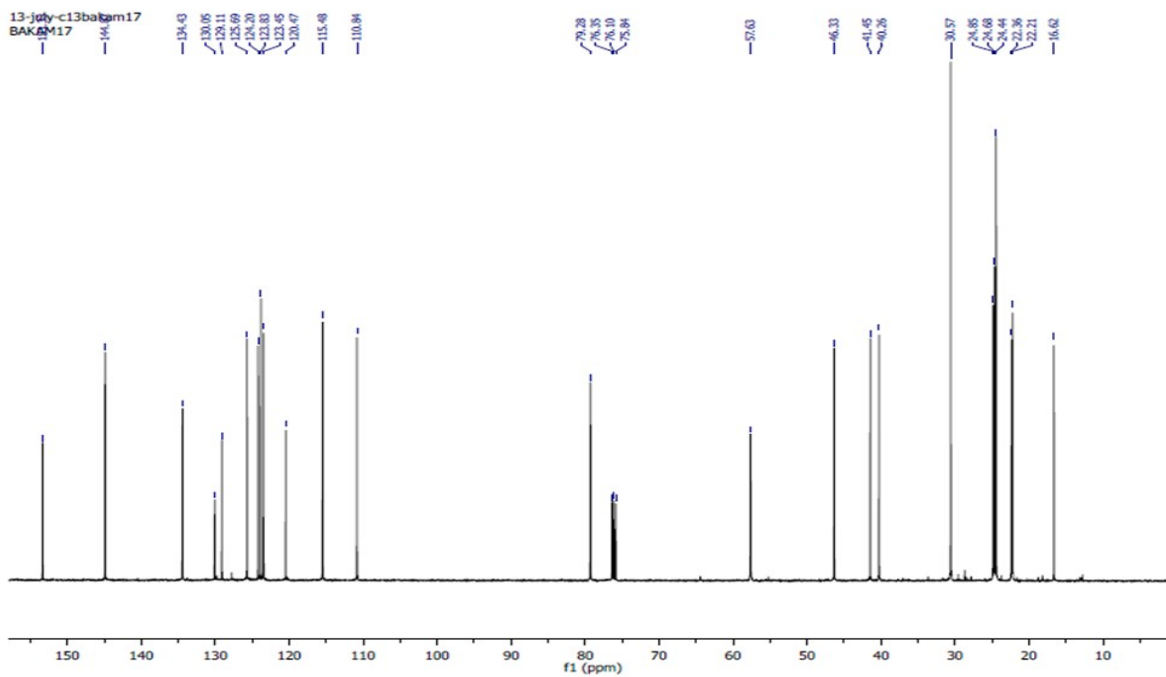

# DEPT-17

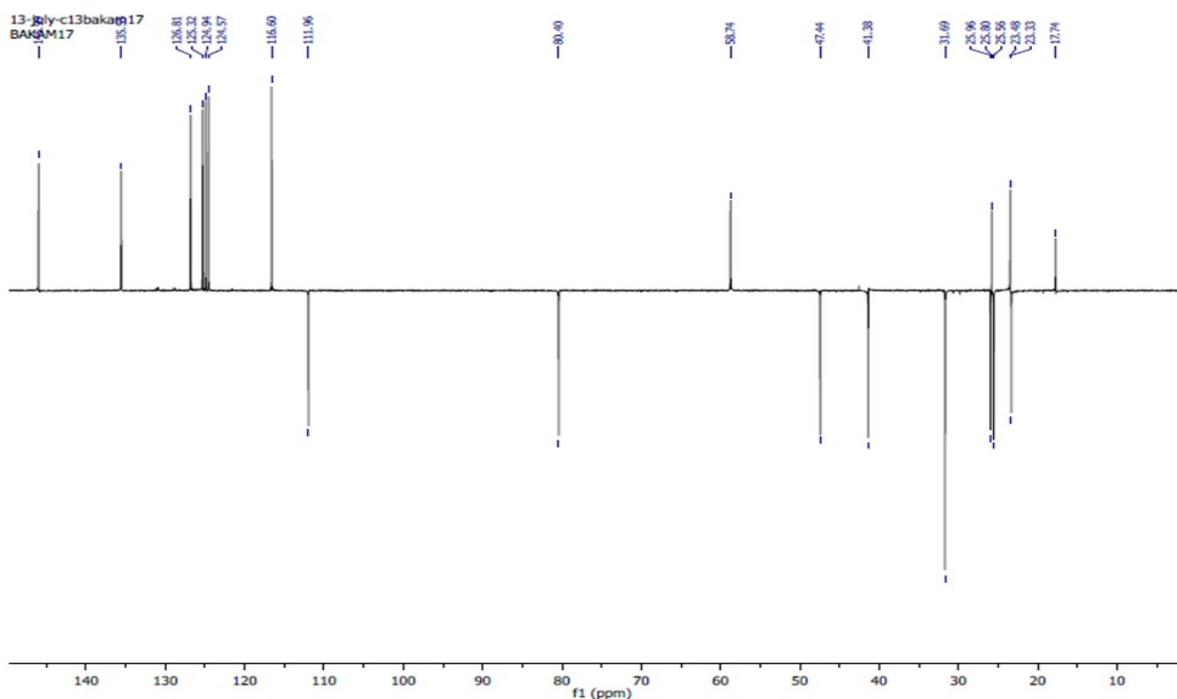

## 17-HRMS

### Compound Table

| Compound Label                              | RT    | Mass     | Formula                             | MFG Formula                         | MFG Diff (ppm) | DB Formula                          |
|---------------------------------------------|-------|----------|-------------------------------------|-------------------------------------|----------------|-------------------------------------|
| Cpd 83: C <sub>26</sub> H <sub>37</sub> N O | 0.364 | 379.2876 | C <sub>26</sub> H <sub>37</sub> N O | C <sub>26</sub> H <sub>37</sub> N O | -0.23          | C <sub>26</sub> H <sub>37</sub> N O |

| Compound Label                              | m/z      | RT    | Algorithm                 | Mass     |
|---------------------------------------------|----------|-------|---------------------------|----------|
| Cpd 83: C <sub>26</sub> H <sub>37</sub> N O | 380.2947 | 0.364 | Find by Molecular Feature | 379.2876 |

### MFE MS Spectrum

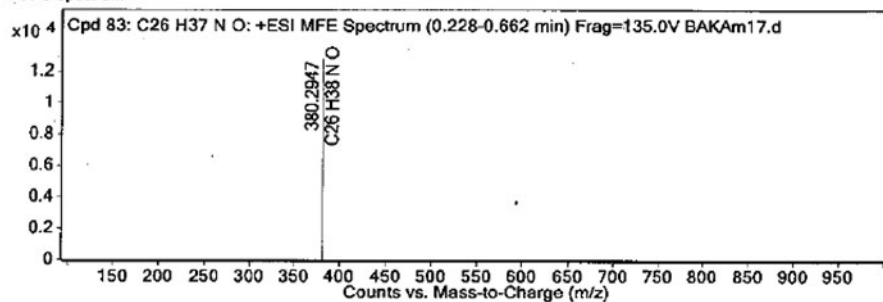

### MS Spectrum Peak List

| m/z      | z | Abund    | Formula                             | Ion                |
|----------|---|----------|-------------------------------------|--------------------|
| 380.2947 | 1 | 12866.17 | C <sub>26</sub> H <sub>38</sub> N O | (M+H) <sup>+</sup> |
| 381.2987 | 1 | 4319.7   | C <sub>26</sub> H <sub>38</sub> N O | (M+H) <sup>+</sup> |

### Predicted Isotope Match Table

| Isotope | m/z      | Calc m/z | Diff (ppm) | Abund % | Calc Abund % | Abund Sum % | Calc Abund Sum % |
|---------|----------|----------|------------|---------|--------------|-------------|------------------|
| 1       | 380.2947 | 380.2948 | 0.22       | 100     | 100          | 74.86       | 77.54            |
| 2       | 381.2987 | 381.2981 | -1.54      | 33.57   | 28.96        | 25.14       | 22.46            |

**3,4-dihydro-6-(3,7-dimethyl-3-vinylocta-1,6-dienyl)-3-phenethyl-2H-benzo[e][1,3]oxazine (18)**

**18-<sup>1</sup>H NMR**

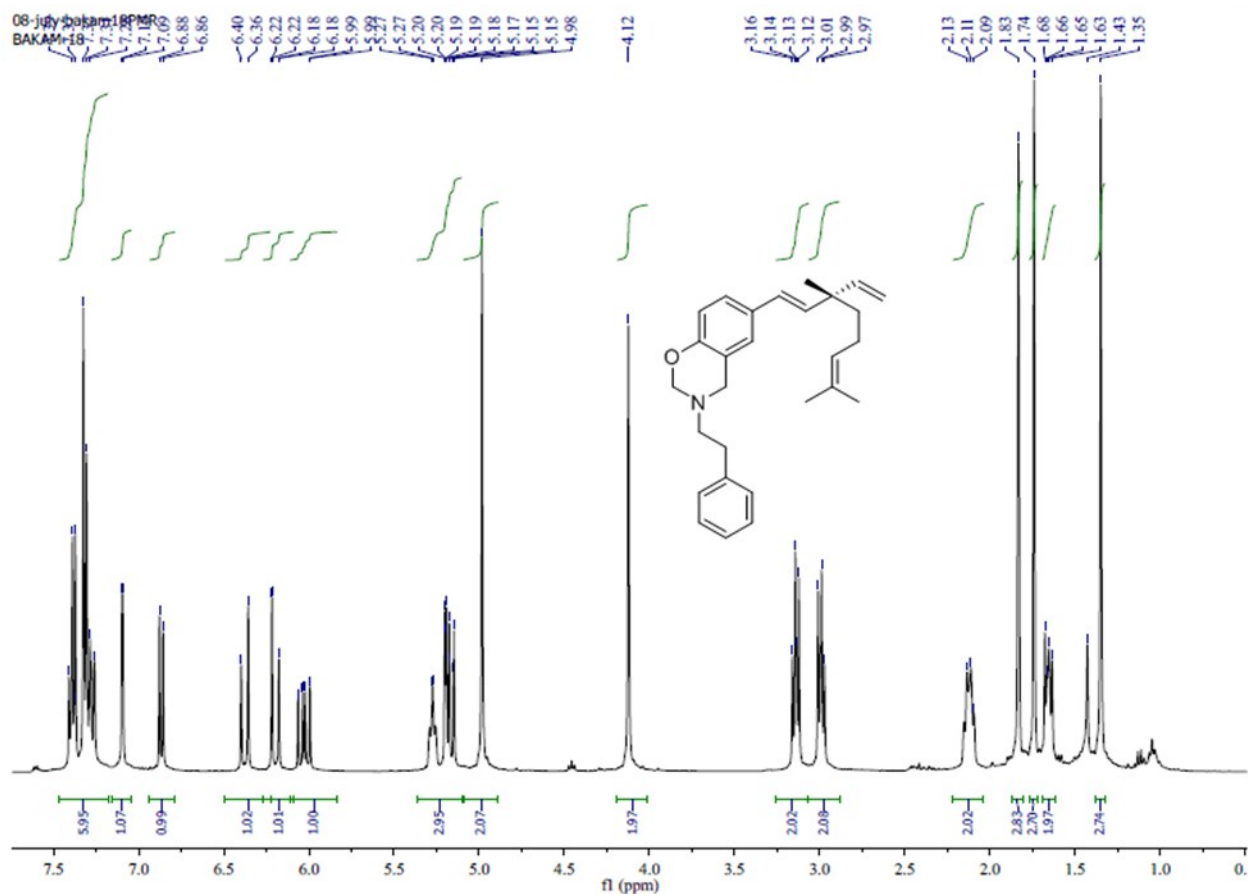

**18 - <sup>13</sup>C NMR**

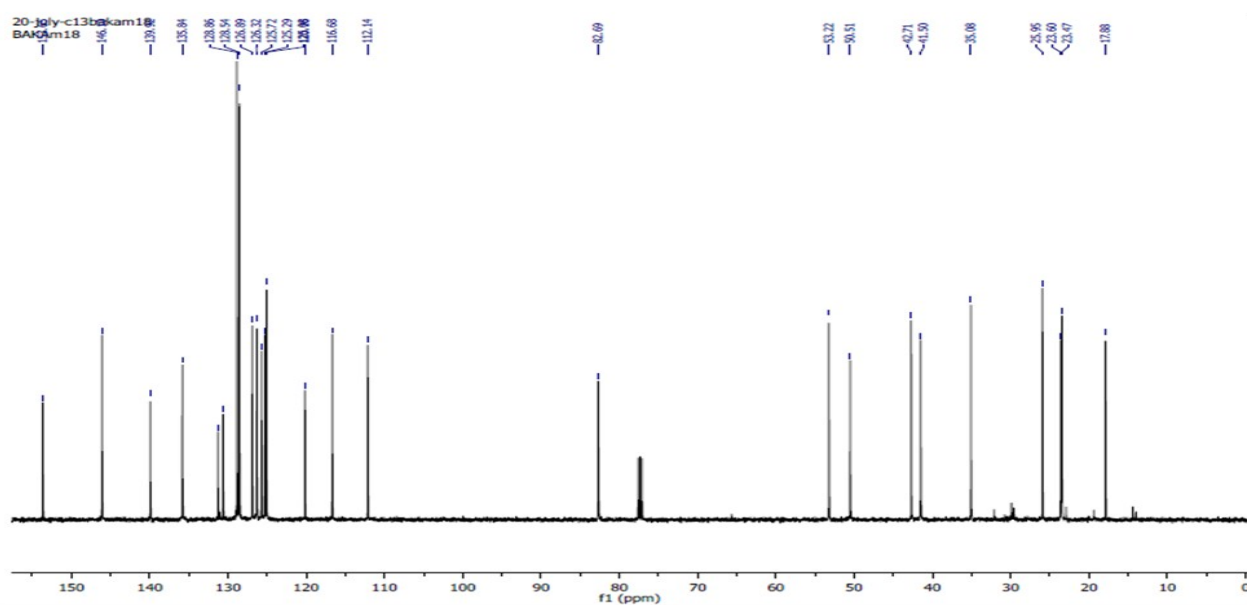

## DEPT- 18

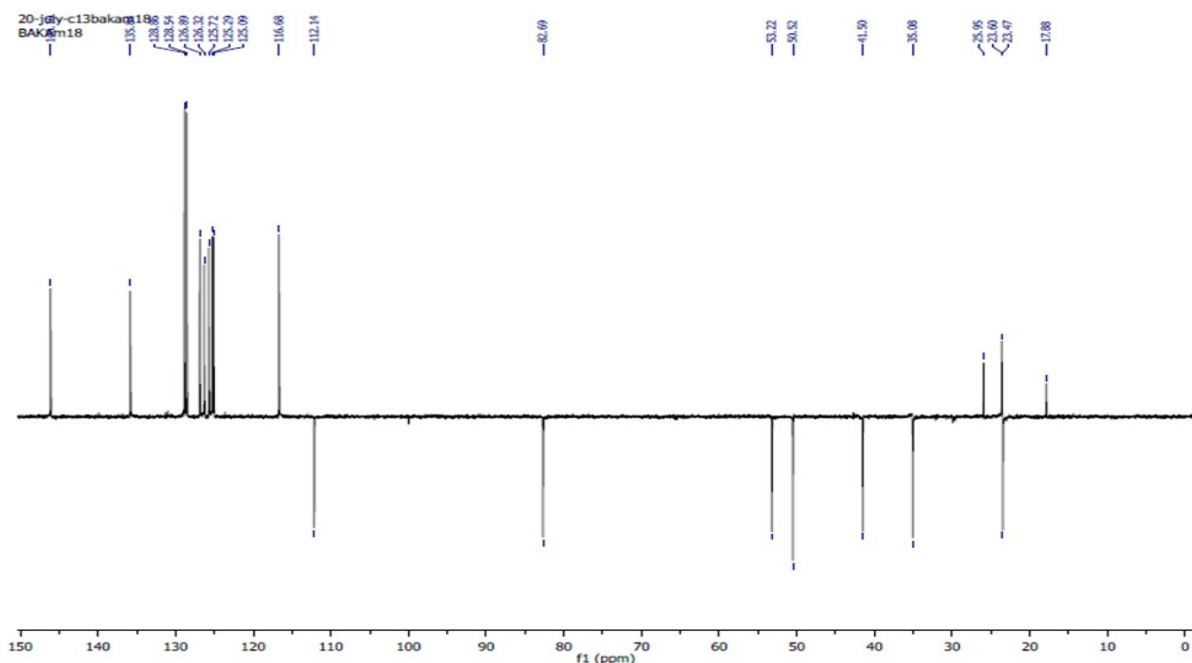

## 18-HRMS

## Compound Table

| Compound Label                             | RT    | Mass     | Formula                             | MFG Formula                         | MFG Diff (ppm) | DB Formula                          |
|--------------------------------------------|-------|----------|-------------------------------------|-------------------------------------|----------------|-------------------------------------|
| Cpd 3: C <sub>28</sub> H <sub>35</sub> N O | 0.315 | 401.2715 | C <sub>28</sub> H <sub>35</sub> N O | C <sub>28</sub> H <sub>35</sub> N O | 0.96           | C <sub>28</sub> H <sub>35</sub> N O |

| Compound Label                             | m/z      | RT    | Algorithm                 | Mass     |
|--------------------------------------------|----------|-------|---------------------------|----------|
| Cpd 3: C <sub>28</sub> H <sub>35</sub> N O | 402.2788 | 0.315 | Find by Molecular Feature | 401.2715 |

## MFE MS Spectrum

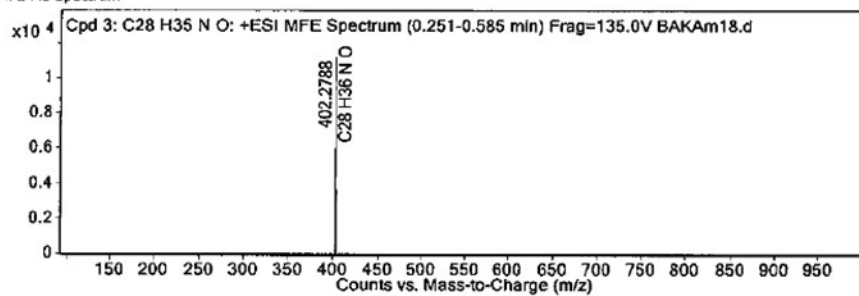

## MS Spectrum Peak List

| m/z      | z | Abund    | Formula                             | Ion                |
|----------|---|----------|-------------------------------------|--------------------|
| 402.2788 | 1 | 11184.95 | C <sub>28</sub> H <sub>36</sub> N O | (M+H) <sup>+</sup> |
| 403.282  | 1 | 3654.15  | C <sub>28</sub> H <sub>36</sub> N O | (M+H) <sup>+</sup> |

## Predicted Isotope Match Table

| Isotope | m/z      | Calc m/z | Diff (ppm) | Abund % | Calc Abund % | Abund Sum % | Calc Abund Sum % |
|---------|----------|----------|------------|---------|--------------|-------------|------------------|
| 1       | 402.2788 | 402.2791 | 0.92       | 100     | 100          | 75.37       | 76.28            |
| 2       | 403.282  | 403.2825 | 1.08       | 32.67   | 31.1         | 24.63       | 23.72            |

**3-(3,4-dimethoxyphenethyl)-3,4-dihydro-6-(3,7-dimethyl-3-vinylocta-1,6-dienyl)-2H-benzo[e][1,3]oxazine (19)**

**19-<sup>1</sup>H NMR**

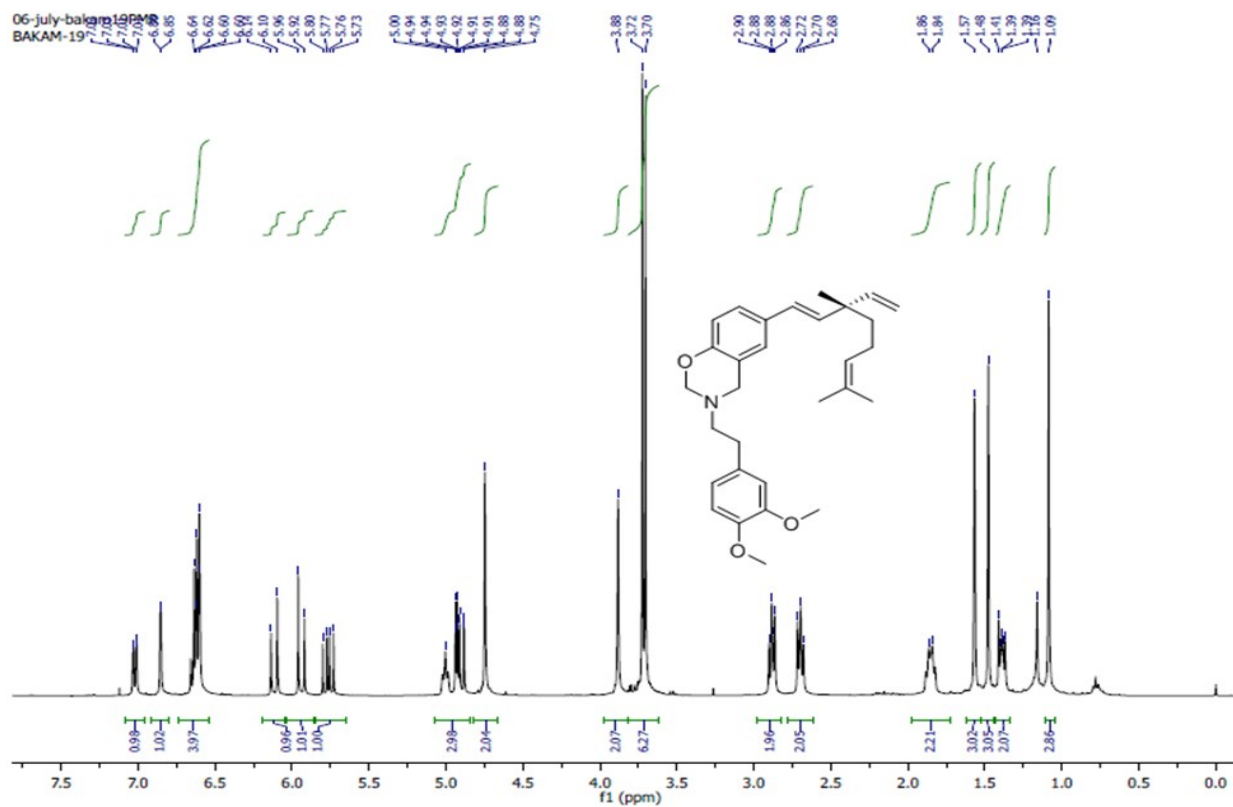

**19 - <sup>13</sup>C NMR**

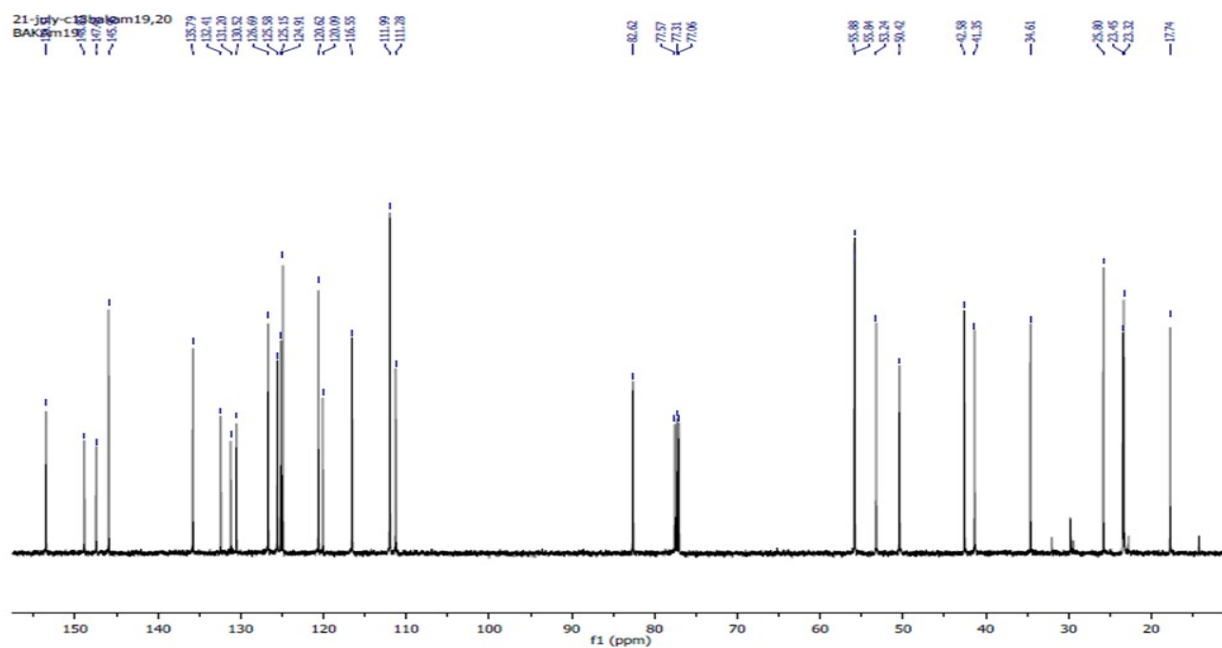

## DEPT-19

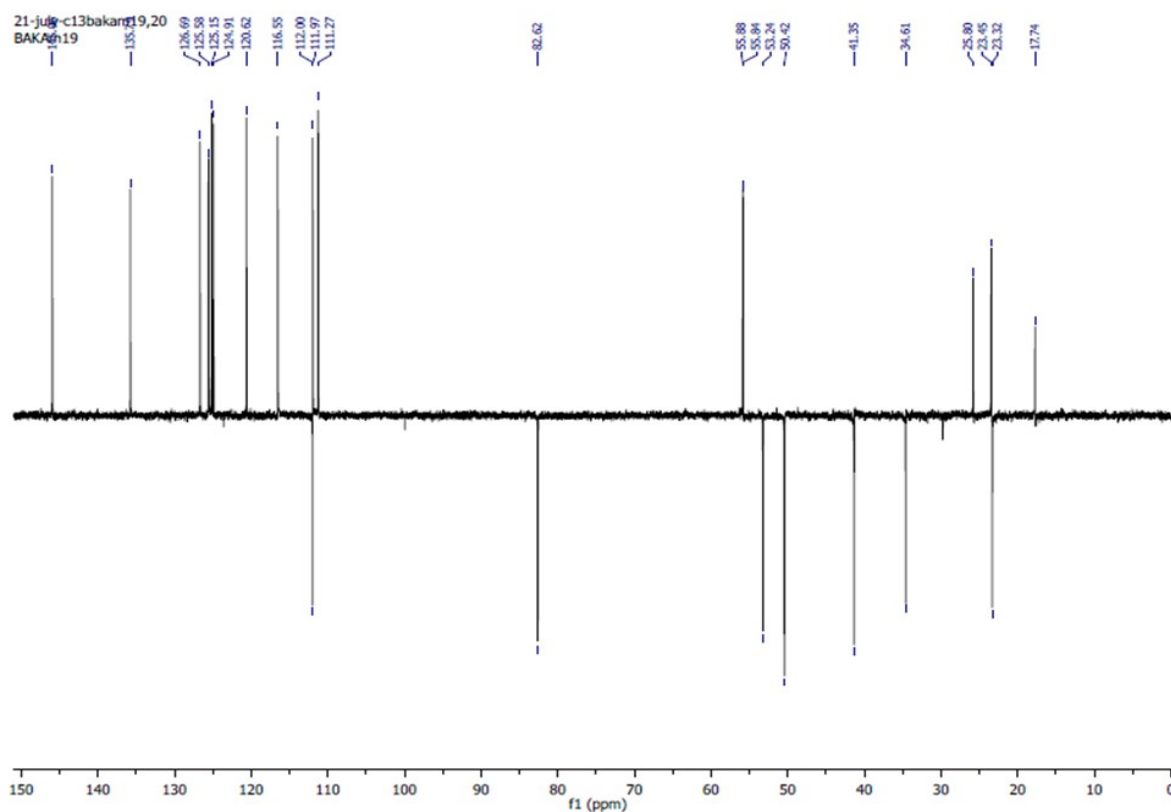

## 19-HRMS

### Compound Table

| Compound Label                                           | RT    | Mass     | Formula                                          | MFG Formula                                      | MFG Diff (ppm) | DB Formula                                       |
|----------------------------------------------------------|-------|----------|--------------------------------------------------|--------------------------------------------------|----------------|--------------------------------------------------|
| Cpd 18: C <sub>30</sub> H <sub>39</sub> N O <sub>3</sub> | 0.528 | 461.2921 | C <sub>30</sub> H <sub>39</sub> N O <sub>3</sub> | C <sub>30</sub> H <sub>39</sub> N O <sub>3</sub> | 2              | C <sub>30</sub> H <sub>39</sub> N O <sub>3</sub> |

| Compound Label                                           | m/z      | RT    | Algorithm                 | Mass     |
|----------------------------------------------------------|----------|-------|---------------------------|----------|
| Cpd 18: C <sub>30</sub> H <sub>39</sub> N O <sub>3</sub> | 462.2992 | 0.528 | Find by Molecular Feature | 461.2921 |

### MFE MS Spectrum

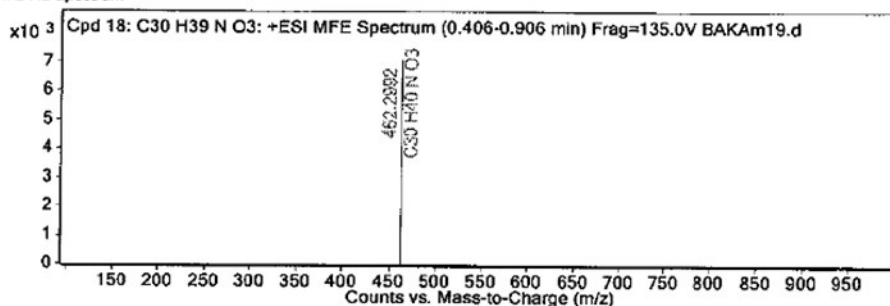

### MS Spectrum Peak List

| m/z      | z | Abund   | Formula                                          | Ion                |
|----------|---|---------|--------------------------------------------------|--------------------|
| 462.2992 | 1 | 7066.21 | C <sub>30</sub> H <sub>40</sub> N O <sub>3</sub> | (M+H) <sup>+</sup> |
| 463.3031 | 1 | 2498.26 | C <sub>30</sub> H <sub>40</sub> N O <sub>3</sub> | (M+H) <sup>+</sup> |

### Predicted Isotope Match Table

| Isotope | m/z      | Calc m/z | Diff (ppm) | Abund % | Calc Abund % | Abund Sum % | Calc Abund Sum % |
|---------|----------|----------|------------|---------|--------------|-------------|------------------|
| 1       | 462.2992 | 462.3003 | 2.33       | 100     | 100          | 73.88       | 74.97            |
| 2       | 463.3031 | 463.3036 | 1.02       | 35.36   | 33.39        | 26.12       | 25.03            |

20-<sup>1</sup>H NMR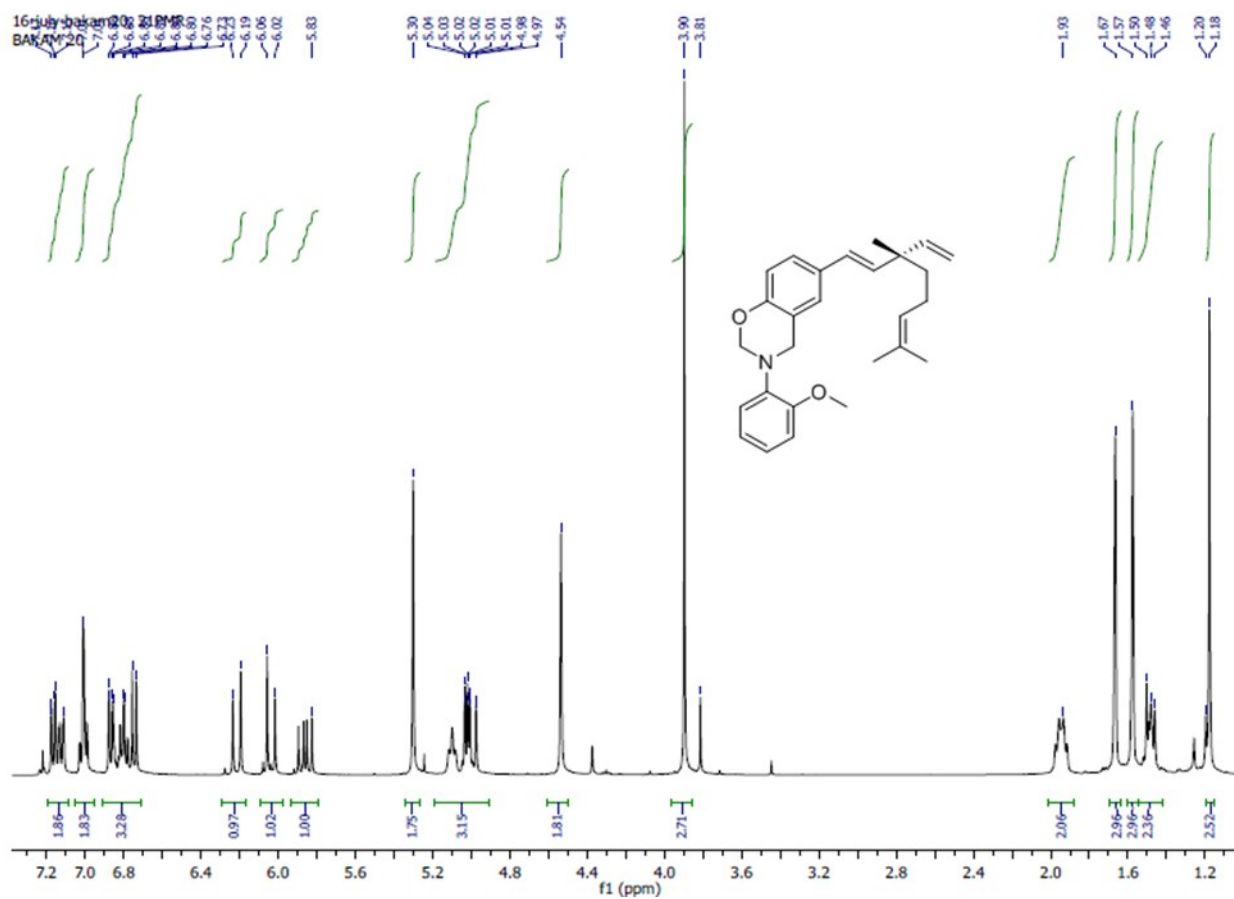20-  $^{13}\text{C}$  NMR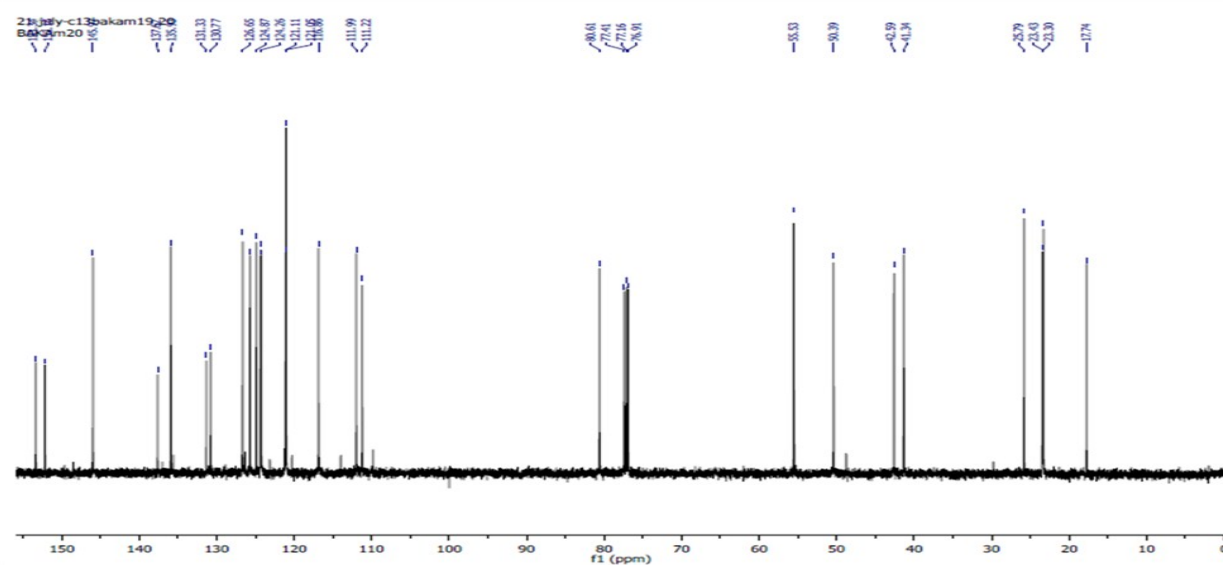



## DEPT-20

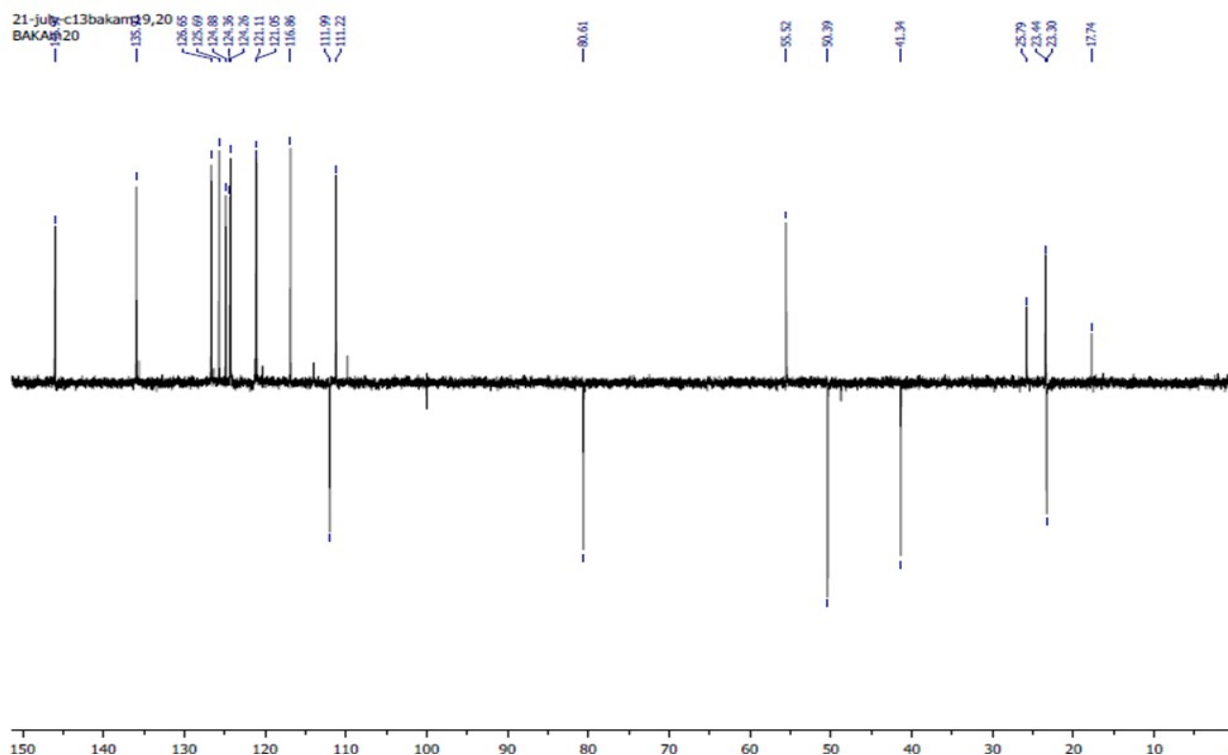

## 20 -HRMS

### Compound Table

| Compound Label       | RT    | Mass    | Formula      | MFG Formula  | MFG Diff (ppm) | DB Formula   |
|----------------------|-------|---------|--------------|--------------|----------------|--------------|
| Cpd 12: C27 H33 N O2 | 0.519 | 403.251 | C27 H33 N O2 | C27 H33 N O2 | 0.37           | C27 H33 N O2 |

| Compound Label       | m/z      | RT    | Algorithm                 | Mass    |
|----------------------|----------|-------|---------------------------|---------|
| Cpd 12: C27 H33 N O2 | 404.2582 | 0.519 | Find by Molecular Feature | 403.251 |

### MFE MS Spectrum

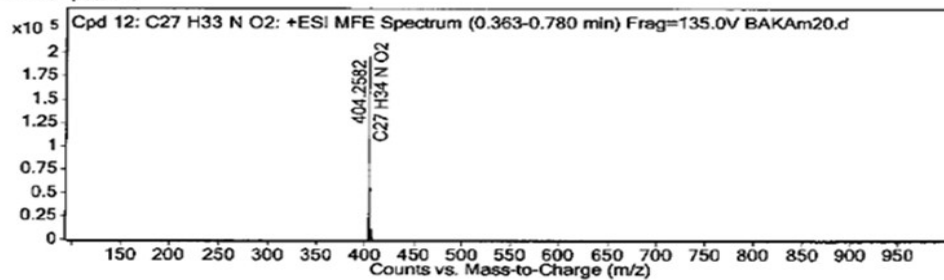

### MS Spectrum Peak List

| m/z      | z | Abund     | Formula      | Ion    |
|----------|---|-----------|--------------|--------|
| 404.2582 | 1 | 196469.95 | C27 H34 N O2 | (M+H)+ |
| 405.2618 | 1 | 55146.48  | C27 H34 N O2 | (M+H)+ |
| 406.2646 | 1 | 11701.7   | C27 H34 N O2 | (M+H)+ |
| 407.2677 | 1 | 1823.6    | C27 H34 N O2 | (M+H)+ |

### Predicted Isotope Match Table

| Isotope | m/z      | Calc m/z | Diff (ppm) | Abund % | Calc Abund % | Abund Sum % | Calc Abund Sum % |
|---------|----------|----------|------------|---------|--------------|-------------|------------------|
| 1       | 404.2582 | 404.2584 | 0.51       | 100     | 100          | 74.1        | 73.9             |
| 2       | 405.2618 | 405.2617 | -0.14      | 28.07   | 30.04        | 20.8        | 22.19            |
| 3       | 406.2646 | 406.2648 | 0.47       | 5.96    | 4.76         | 4.41        | 3.52             |
| 4       | 407.2677 | 407.2678 | 0.23       | 0.93    | 0.53         | 0.69        | 0.39             |



**3,4-dihydro-3-(2,3-dihydrobenzo[1,4]dioxin-6-yl)-6-(3,7-dimethyl-3-vinylocta-1,6-dienyl)-2H-benzo[e][1,3]oxazine (21)**

**21-<sup>1</sup>H NMR**

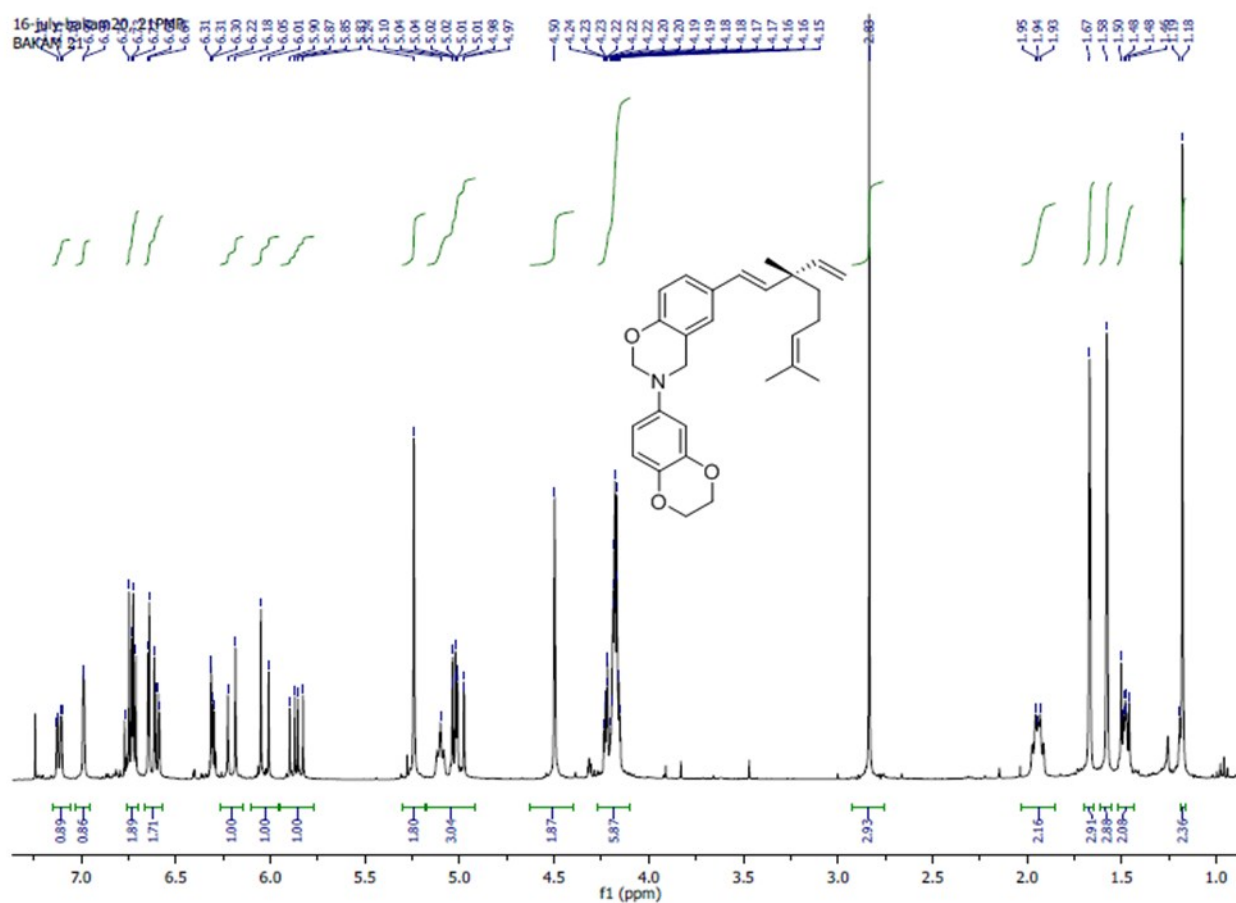

**21-<sup>13</sup>C NMR**

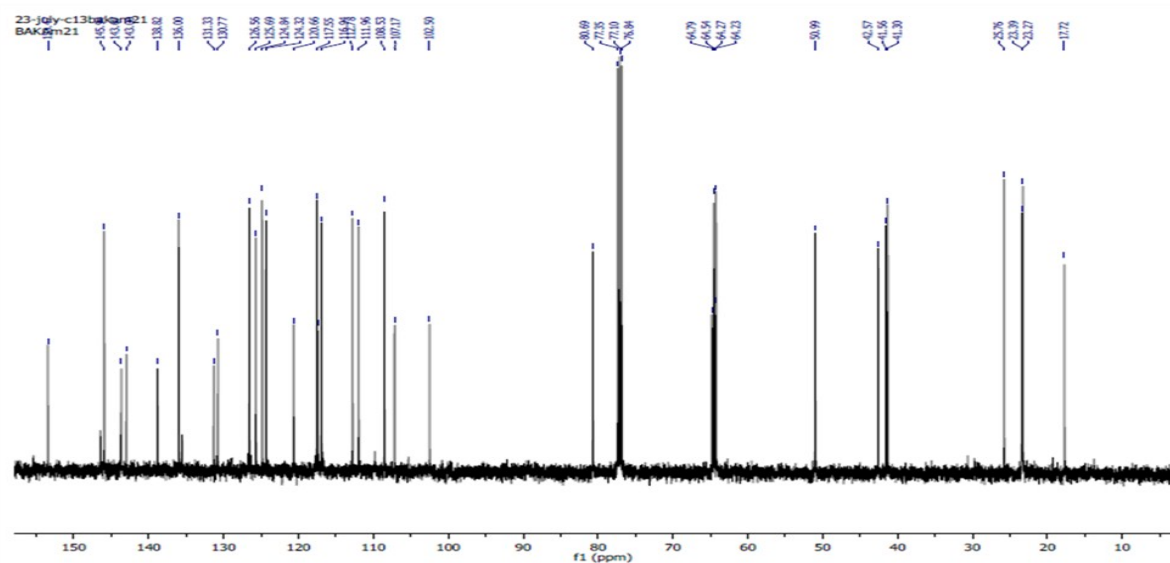

# DEPT- 21

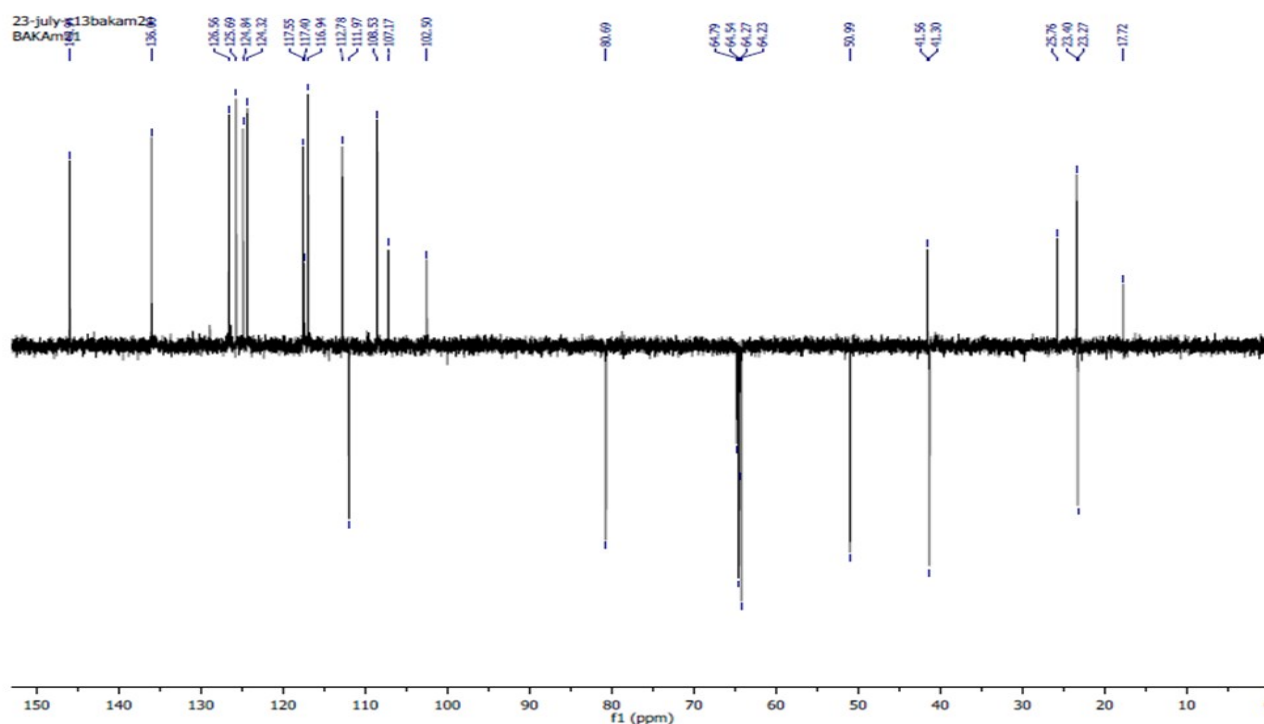

## 21 -HRMS

### Compound Table

| Compound Label                                          | RT    | Mass     | Formula                                          | MFG Formula                                      | MFG Diff (ppm) | DB Formula                                       |
|---------------------------------------------------------|-------|----------|--------------------------------------------------|--------------------------------------------------|----------------|--------------------------------------------------|
| Cpd 6: C <sub>28</sub> H <sub>33</sub> N O <sub>3</sub> | 0.241 | 431.2475 | C <sub>28</sub> H <sub>33</sub> N O <sub>3</sub> | C <sub>28</sub> H <sub>33</sub> N O <sub>3</sub> | -3.39          | C <sub>28</sub> H <sub>33</sub> N O <sub>3</sub> |

| Compound Label                                          | m/z      | RT    | Algorithm                 | Mass     |
|---------------------------------------------------------|----------|-------|---------------------------|----------|
| Cpd 6: C <sub>28</sub> H <sub>33</sub> N O <sub>3</sub> | 432.2549 | 0.241 | Find by Molecular Feature | 431.2475 |

### MFE MS Spectrum

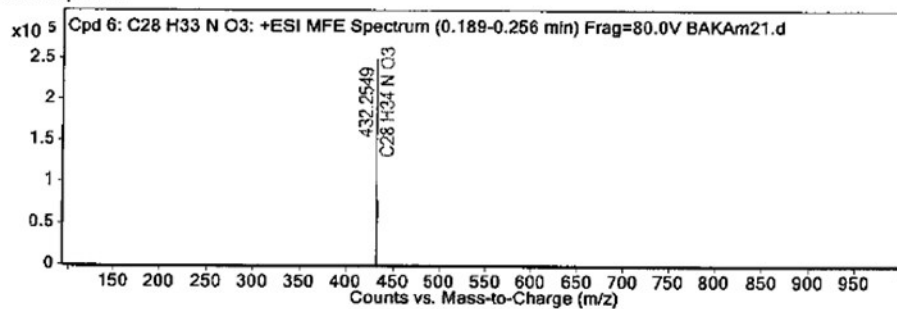

### MS Spectrum Peak List

| m/z      | z | Abund     | Formula                                          | Ion                |
|----------|---|-----------|--------------------------------------------------|--------------------|
| 432.2549 | 1 | 247852.38 | C <sub>28</sub> H <sub>34</sub> N O <sub>3</sub> | (M+H) <sup>+</sup> |
| 433.2578 | 1 | 78987.55  | C <sub>28</sub> H <sub>34</sub> N O <sub>3</sub> | (M+H) <sup>+</sup> |

### Predicted Isotope Match Table

| Isotope | m/z      | Calc m/z | Diff (ppm) | Abund % | Calc Abund % | Abund Sum % | Calc Abund Sum % |
|---------|----------|----------|------------|---------|--------------|-------------|------------------|
| 1       | 432.2549 | 432.2533 | -3.63      | 100     | 100          | 75.83       | 76.25            |
| 2       | 433.2578 | 433.2566 | -2.61      | 31.87   | 31.15        | 24.17       | 23.75            |

**3-((furan-2-yl)methyl)-3,4-dihydro-6-(3,7-dimethyl-3-vinylocta-1,6-dienyl)-2H-benzo[e][1,3]oxazine (22)**

**22-<sup>1</sup>H NMR**

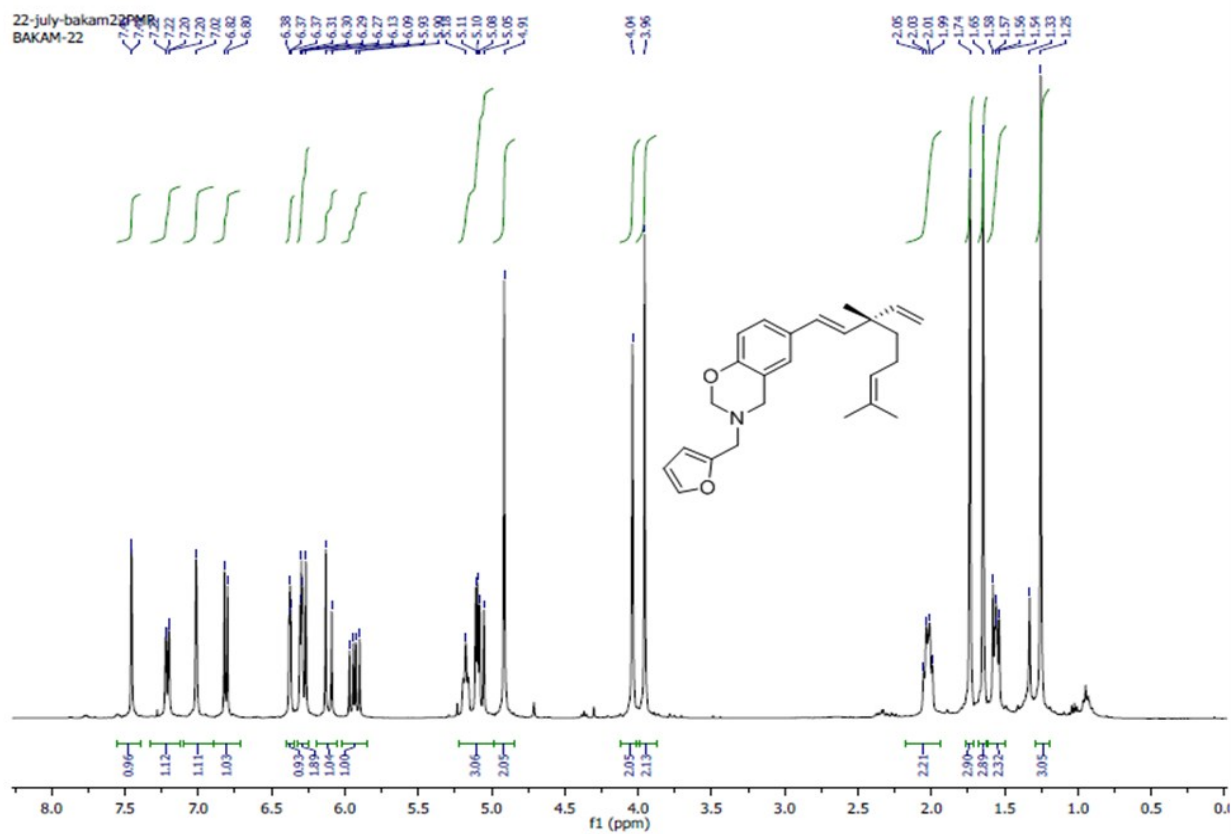

**22-<sup>13</sup>C NMR**

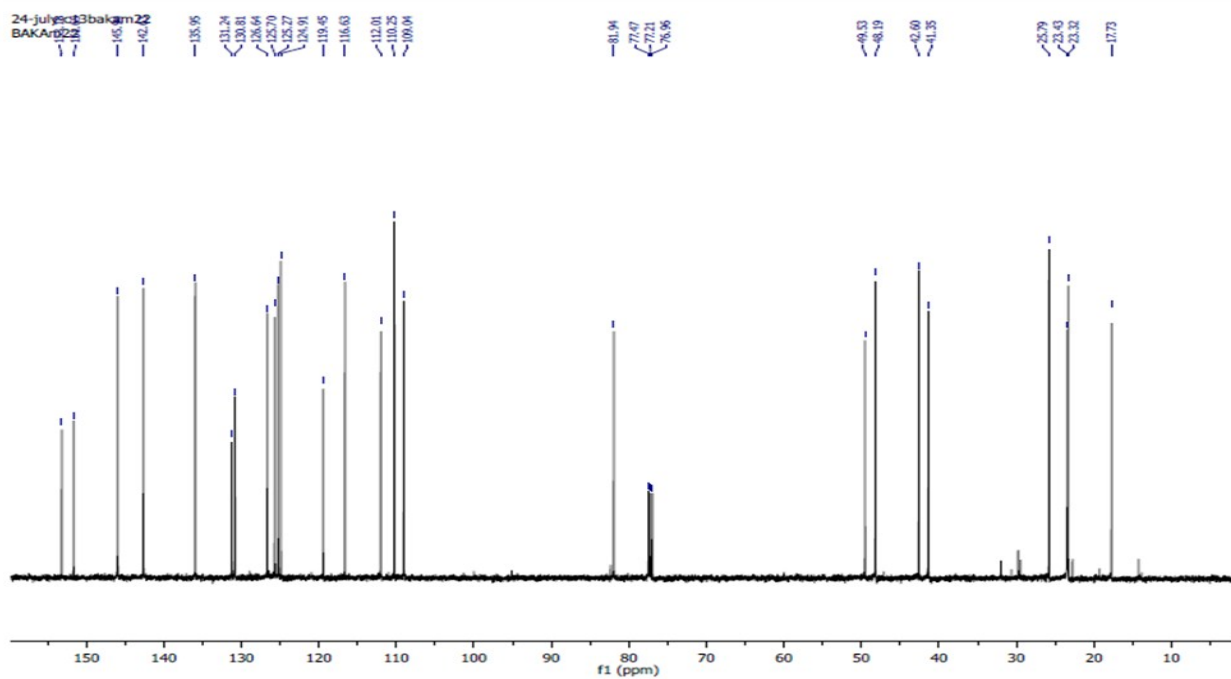

# DEPT- 22

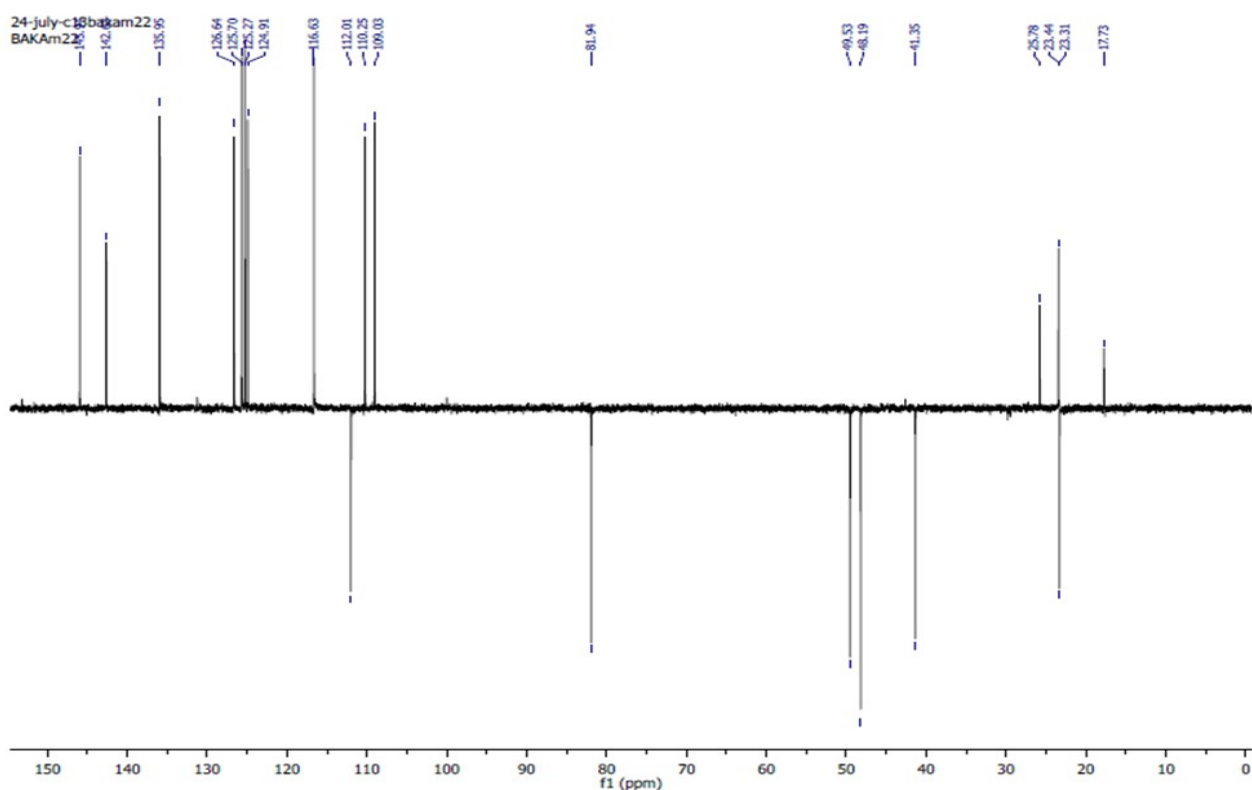

## 22 -HRMS

### Compound Table

| Compound Label                                           | RT    | Mass     | Formula                                          | MFG Formula                                      | MFG Diff (ppm) | DB Formula                                       |
|----------------------------------------------------------|-------|----------|--------------------------------------------------|--------------------------------------------------|----------------|--------------------------------------------------|
| Cpd 11: C <sub>25</sub> H <sub>31</sub> N O <sub>2</sub> | 0.255 | 377.2342 | C <sub>25</sub> H <sub>31</sub> N O <sub>2</sub> | C <sub>25</sub> H <sub>31</sub> N O <sub>2</sub> | 3.42           | C <sub>25</sub> H <sub>31</sub> N O <sub>2</sub> |

| Compound Label                                           | m/z      | RT    | Algorithm                 | Mass     |
|----------------------------------------------------------|----------|-------|---------------------------|----------|
| Cpd 11: C <sub>25</sub> H <sub>31</sub> N O <sub>2</sub> | 378.2414 | 0.255 | Find by Molecular Feature | 377.2342 |

### MFE MS Spectrum

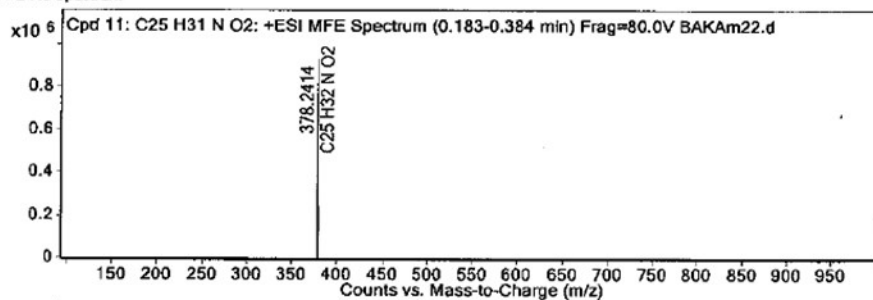

### MS Spectrum Peak List

| m/z      | z | Abund     | Formula                                          | Ion                |
|----------|---|-----------|--------------------------------------------------|--------------------|
| 378.2414 | 1 | 932569.69 | C <sub>25</sub> H <sub>32</sub> N O <sub>2</sub> | (M+H) <sup>+</sup> |
| 379.245  | 1 | 242507.36 | C <sub>25</sub> H <sub>32</sub> N O <sub>2</sub> | (M+H) <sup>+</sup> |

### Predicted Isotope Match Table

| Isotope | m/z      | Calc m/z | Diff (ppm) | Abund % | Calc Abund % | Abund Sum % | Calc Abund Sum % |
|---------|----------|----------|------------|---------|--------------|-------------|------------------|
| 1       | 378.2414 | 378.2428 | 3.59       | 100     | 100          | 79.36       | 78.22            |
| 2       | 379.245  | 379.2461 | 2.72       | 26      | 27.85        | 20.64       | 21.78            |

4-(6-(3,7-dimethyl-3-vinylocta-1,6-dienyl)-2H-benzo[e][1,3]oxazin-3(4H)-yl) butan-1-ol  
(23)

<sup>23</sup>H NMR

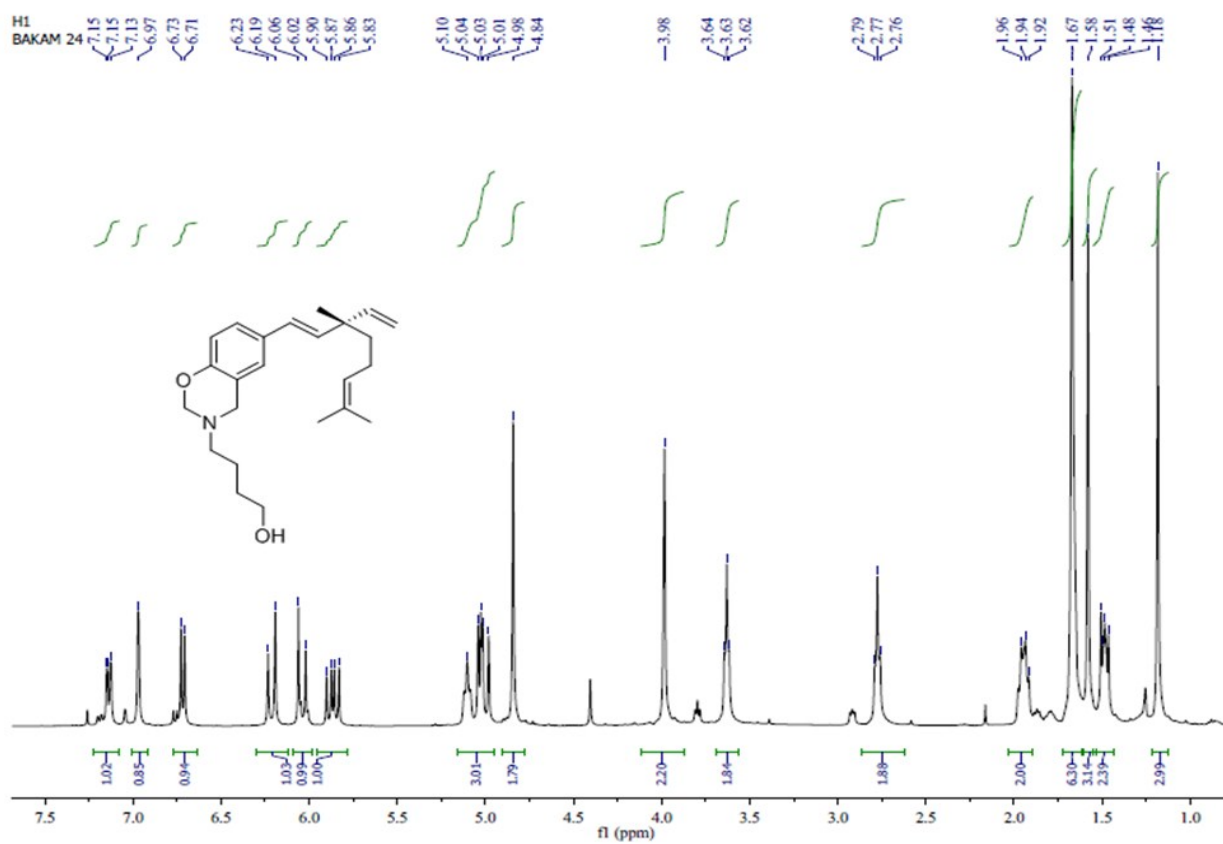

<sup>23</sup>C NMR

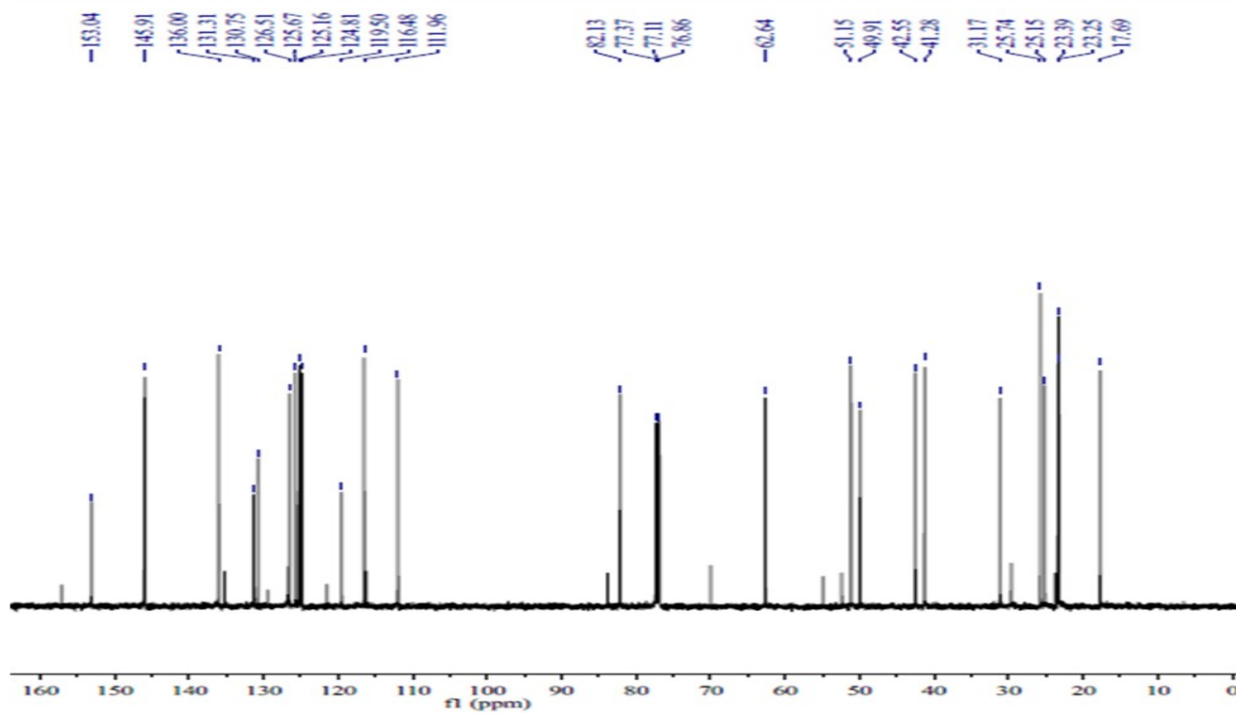

# DEPT- 23

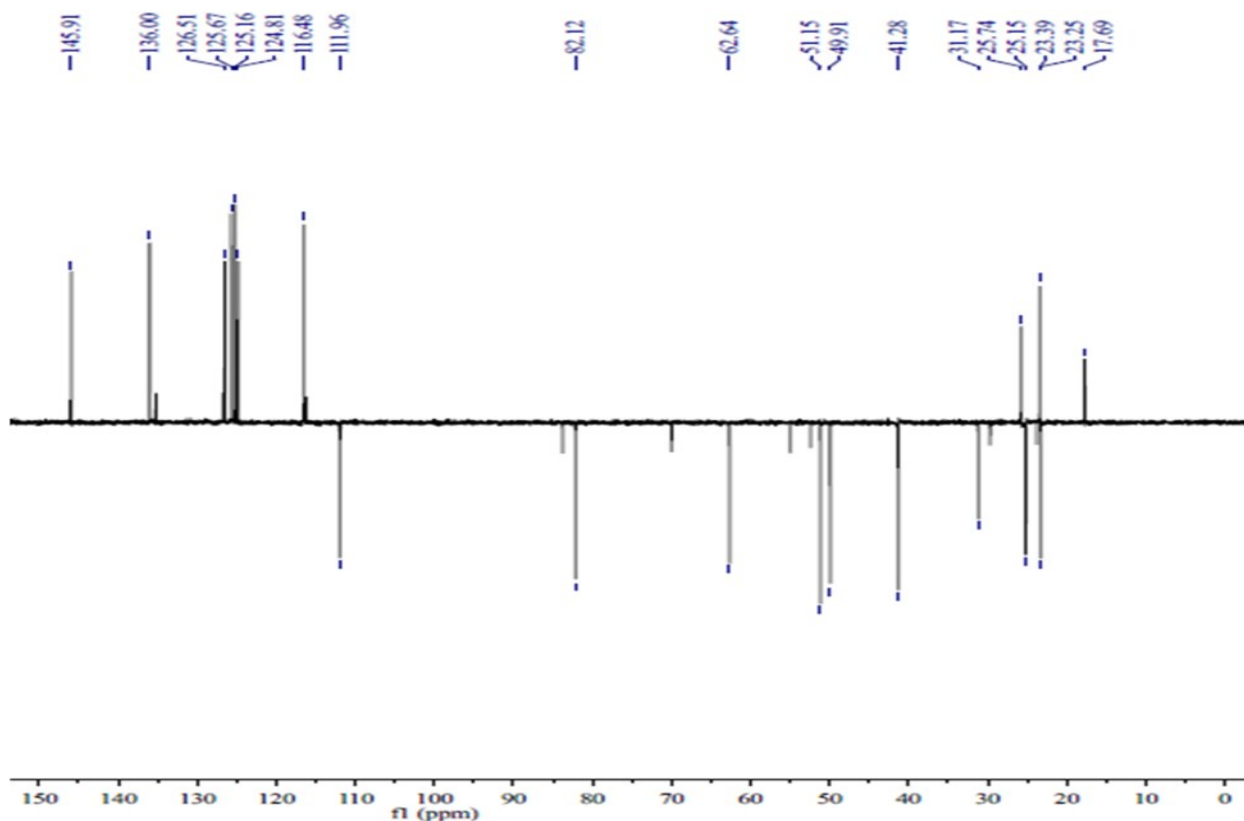

## 23 -HRMS

### Compound Table

| Compound Label                                          | RT    | Mass    | Formula                                          | MFG Formula                                      | MFG Diff (ppm) | DB Formula                                       |
|---------------------------------------------------------|-------|---------|--------------------------------------------------|--------------------------------------------------|----------------|--------------------------------------------------|
| Cpd 4: C <sub>24</sub> H <sub>35</sub> N O <sub>2</sub> | 0.328 | 369.265 | C <sub>24</sub> H <sub>35</sub> N O <sub>2</sub> | C <sub>24</sub> H <sub>35</sub> N O <sub>2</sub> | 4.71           | C <sub>24</sub> H <sub>35</sub> N O <sub>2</sub> |

| Compound Label                                          | m/z      | RT    | Algorithm                 | Mass    |
|---------------------------------------------------------|----------|-------|---------------------------|---------|
| Cpd 4: C <sub>24</sub> H <sub>35</sub> N O <sub>2</sub> | 370.2722 | 0.328 | Find by Molecular Feature | 369.265 |

### MFE MS Spectrum

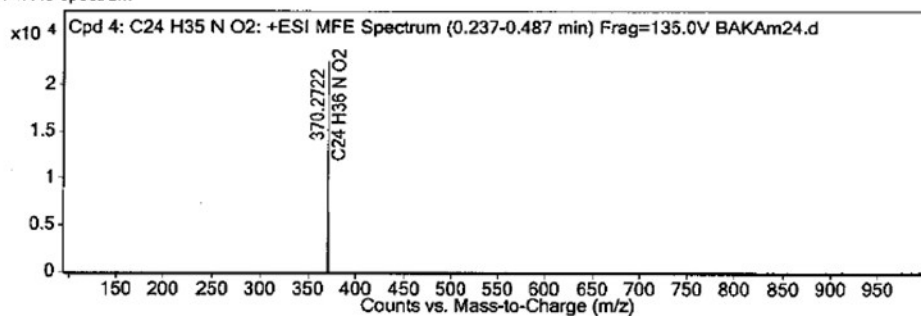

### MS Spectrum Peak List

| m/z      | z | Abund    | Formula                                          | Ion                |
|----------|---|----------|--------------------------------------------------|--------------------|
| 370.2722 | 1 | 22514.18 | C <sub>24</sub> H <sub>36</sub> N O <sub>2</sub> | (M+H) <sup>+</sup> |
| 371.276  | 1 | 6447.44  | C <sub>24</sub> H <sub>36</sub> N O <sub>2</sub> | (M+H) <sup>+</sup> |

### Predicted Isotope Match Table

| Isotope | m/z      | Calc m/z | Diff (ppm) | Abund % | Calc Abund % | Abund Sum % | Calc Abund Sum % |
|---------|----------|----------|------------|---------|--------------|-------------|------------------|
| 1       | 370.2722 | 370.2741 | 5          | 100     | 100          | 77.74       | 78.86            |
| 2       | 371.276  | 371.2774 | 3.63       | 28.64   | 26.81        | 22.26       | 21.14            |

**2-(6-(3,7-dimethyl-3-vinylocta-1,6-dienyl)-2H-benzo[e][1,3]oxazin-3(4H)-yl) ethanamine (24)**

**24-<sup>1</sup>H NMR**

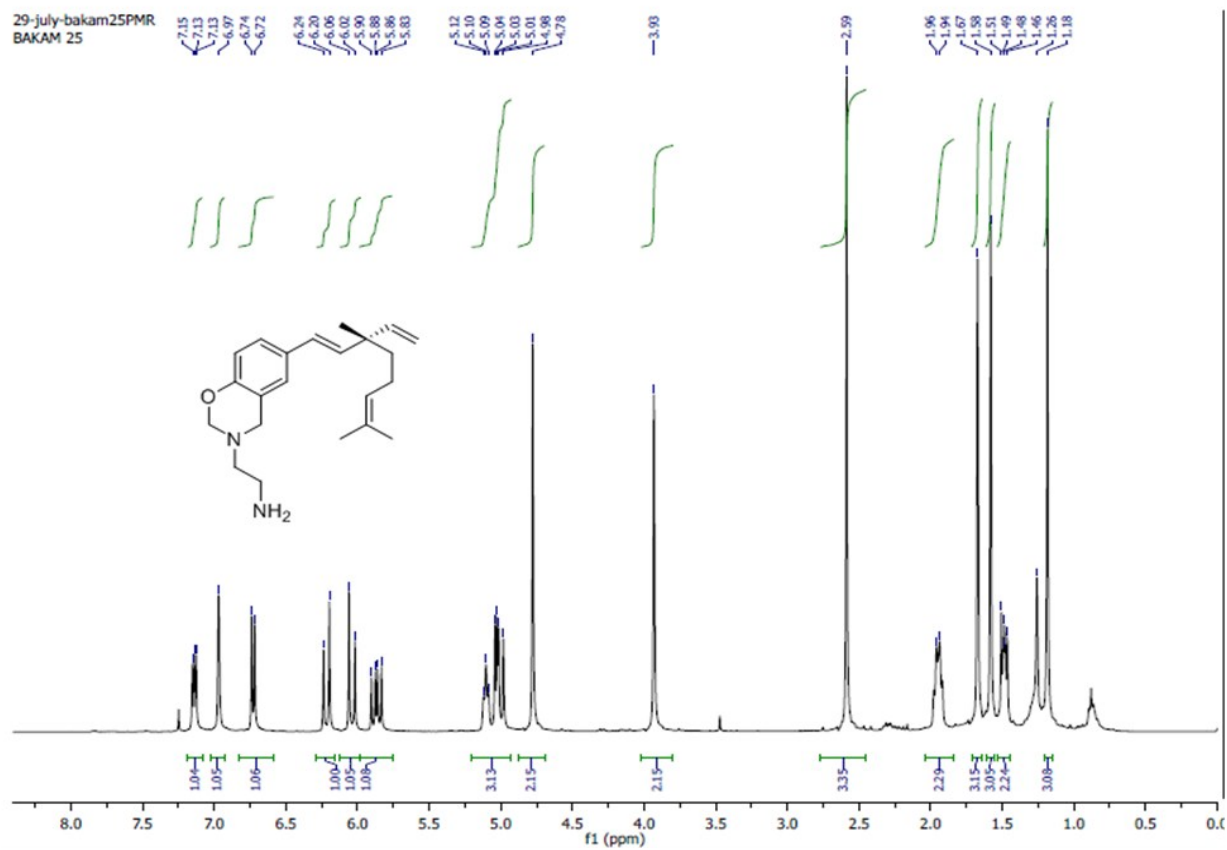

**24-<sup>13</sup>C NMR**

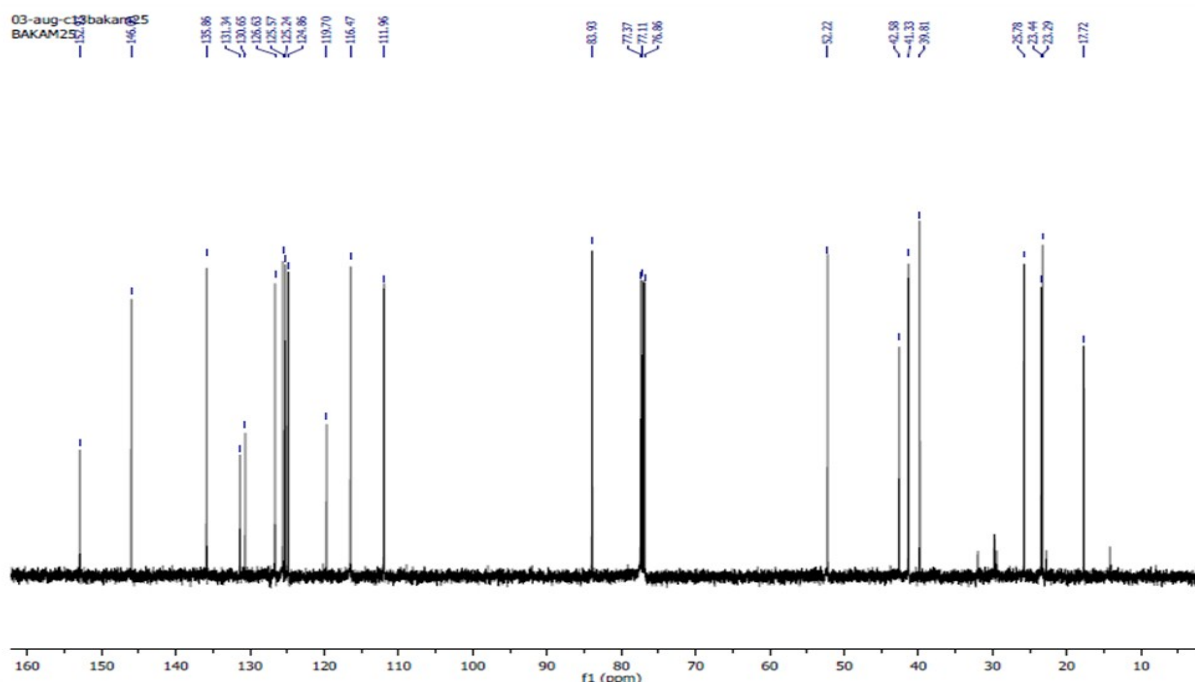



## DEPT- 24

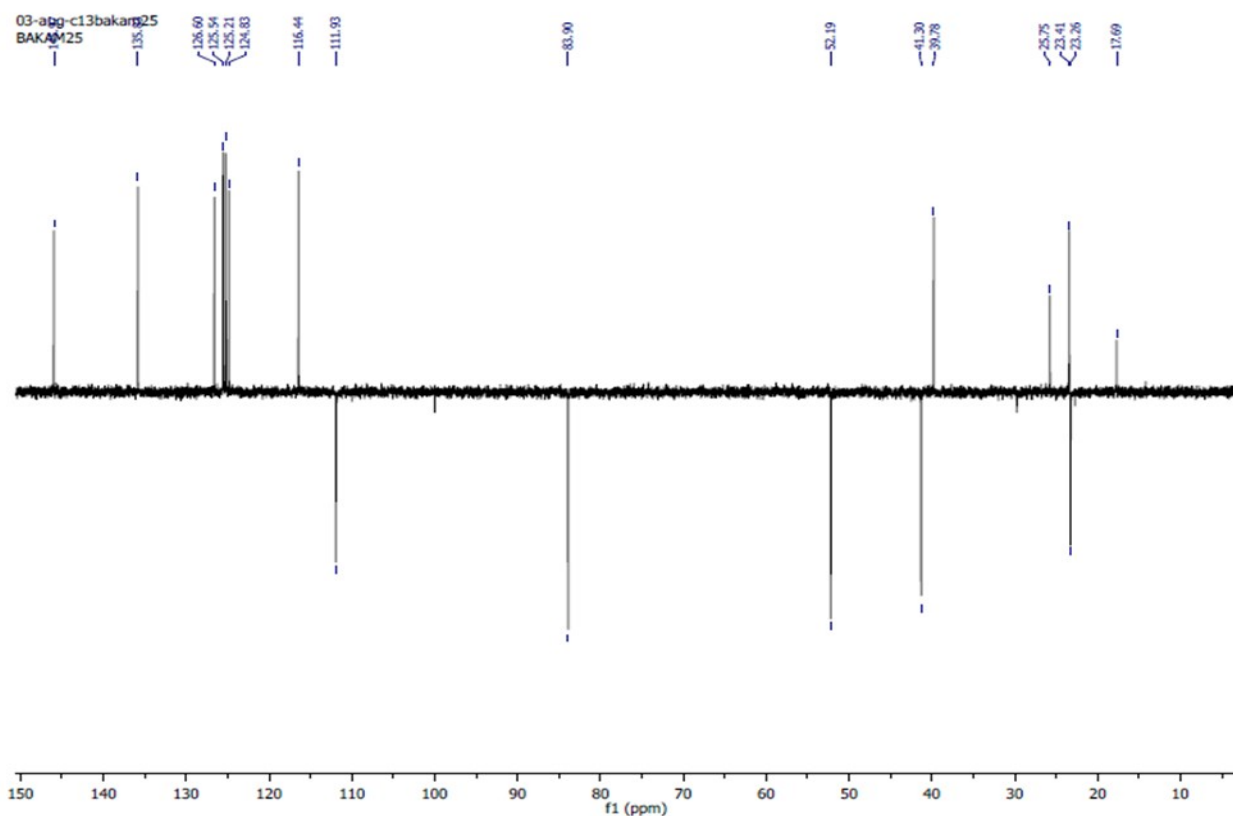

## 24-HRMS

### Compound Table

| Compound Label       | RT   | Mass     | Formula      | MFG Formula  | MFG Diff (ppm) | DB Formula   |
|----------------------|------|----------|--------------|--------------|----------------|--------------|
| Cpd 35: C22 H32 N2 O | 0.27 | 340.2541 | C22 H32 N2 O | C22 H32 N2 O | -7.88          | C22 H32 N2 O |

| Compound Label       | m/z      | RT   | Algorithm                 | Mass     |
|----------------------|----------|------|---------------------------|----------|
| Cpd 35: C22 H32 N2 O | 341.2626 | 0.27 | Find by Molecular Feature | 340.2541 |

### MFE MS Spectrum

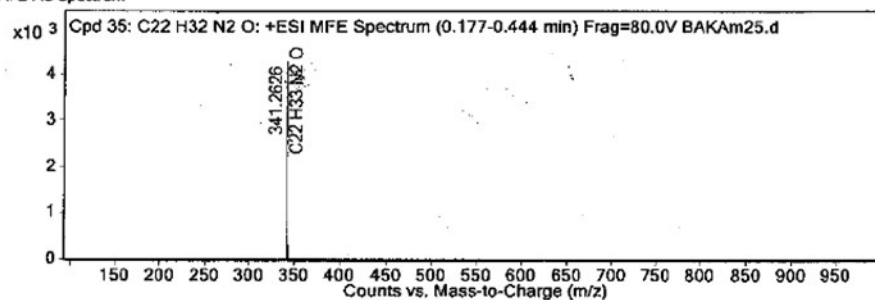

### MS Spectrum Peak List

| m/z      | z | Abund   | Formula      | Ion    |
|----------|---|---------|--------------|--------|
| 341.2626 | 1 | 4279.28 | C22 H33 N2 O | (M+H)+ |
| 342.2637 | 1 | 1013.24 | C22 H33 N2 O | (M+H)+ |
| 343.2539 | 1 | 301.82  | C22 H33 N2 O | (M+H)+ |

### Predicted Isotope Match Table

| Isotope | m/z      | Calc m/z | Diff (ppm) | Abund % | Calc Abund % | Abund Sum % | Calc Abund Sum % |
|---------|----------|----------|------------|---------|--------------|-------------|------------------|
| 1       | 341.2626 | 341.2587 | -11.35     | 100     | 100          | 76.49       | 78.05            |
| 2       | 342.2637 | 342.262  | -5.13      | 23.68   | 24.94        | 18.11       | 19.47            |
| 3       | 343.2539 | 343.265  | 32.49      | 7.05    | 3.19         | 5.4         | 2.49             |



## DEPT- 25

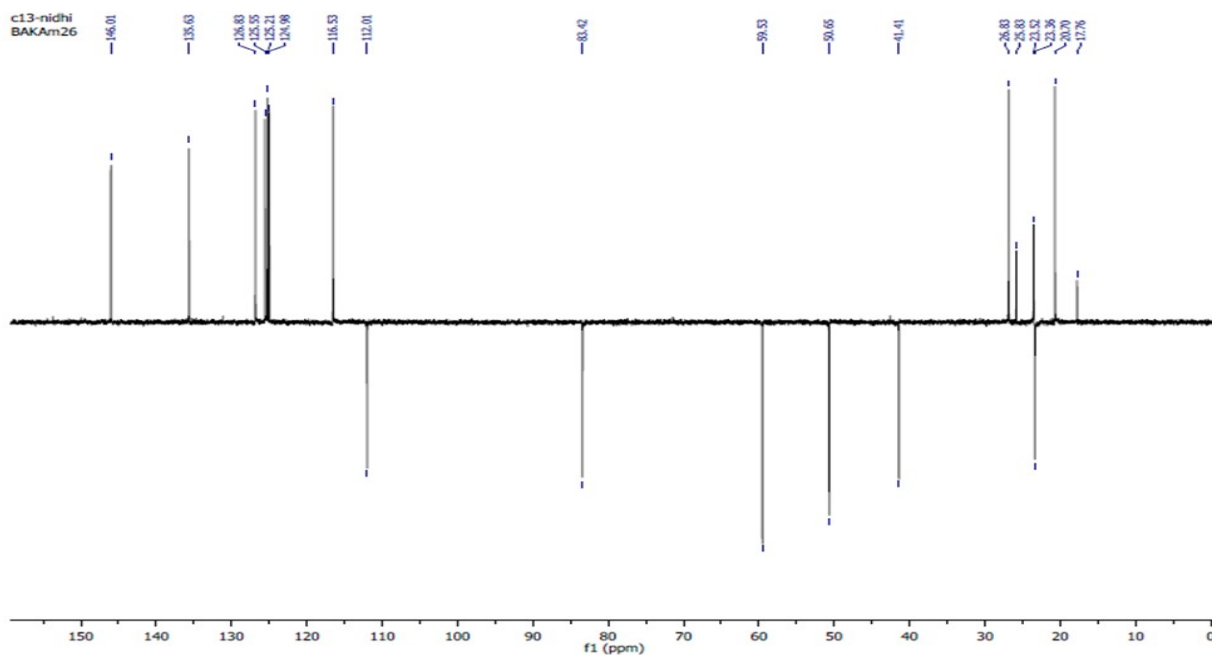

## 25-HRMS

## Compound Table

| Compound Label                              | RT    | Mass     | Formula                             | MFG Formula                         | MFG Diff (ppm) | DB Formula                          |
|---------------------------------------------|-------|----------|-------------------------------------|-------------------------------------|----------------|-------------------------------------|
| Cpd 89: C <sub>24</sub> H <sub>35</sub> N O | 0.367 | 353.2714 | C <sub>24</sub> H <sub>35</sub> N O | C <sub>24</sub> H <sub>35</sub> N O | 1.32           | C <sub>24</sub> H <sub>35</sub> N O |

| Compound Label                              | m/z      | RT    | Algorithm                 | Mass     |
|---------------------------------------------|----------|-------|---------------------------|----------|
| Cpd 89: C <sub>24</sub> H <sub>35</sub> N O | 354.2788 | 0.367 | Find by Molecular Feature | 353.2714 |

## MFE MS Spectrum

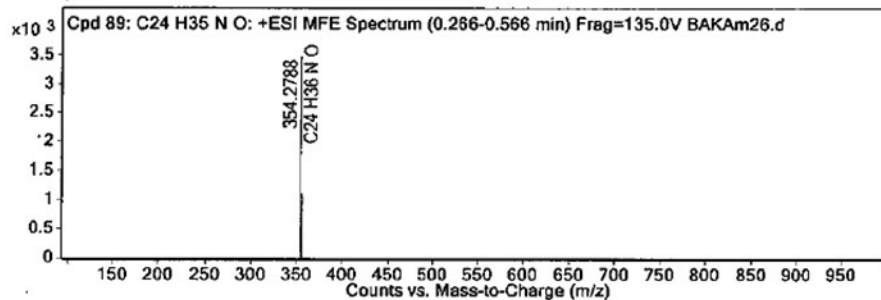

## MS Spectrum Peak List

| m/z      | z | Abund   | Formula                             | Ion                |
|----------|---|---------|-------------------------------------|--------------------|
| 354.2788 | 1 | 3470.52 | C <sub>24</sub> H <sub>36</sub> N O | (M+H) <sup>+</sup> |
| 355.2817 | 1 | 1109.91 | C <sub>24</sub> H <sub>36</sub> N O | (M+H) <sup>+</sup> |

## Predicted Isotope Match Table

| Isotope | m/z      | Calc m/z | Diff (ppm) | Abund % | Calc Abund % | Abund Sum % | Calc Abund Sum % |
|---------|----------|----------|------------|---------|--------------|-------------|------------------|
| 1       | 354.2788 | 354.2791 | 1.03       | 100     | 100          | 75.77       | 78.88            |
| 2       | 355.2817 | 355.2825 | 2.23       | 31.98   | 26.78        | 24.23       | 21.12            |

**3,4-dihydro-3-isopropyl-6-(3,7-dimethyl-3-vinylocta-1,6-dienyl)-2H-benzo[e][1,3]oxazine (26)**

**26-<sup>1</sup>H NMR**

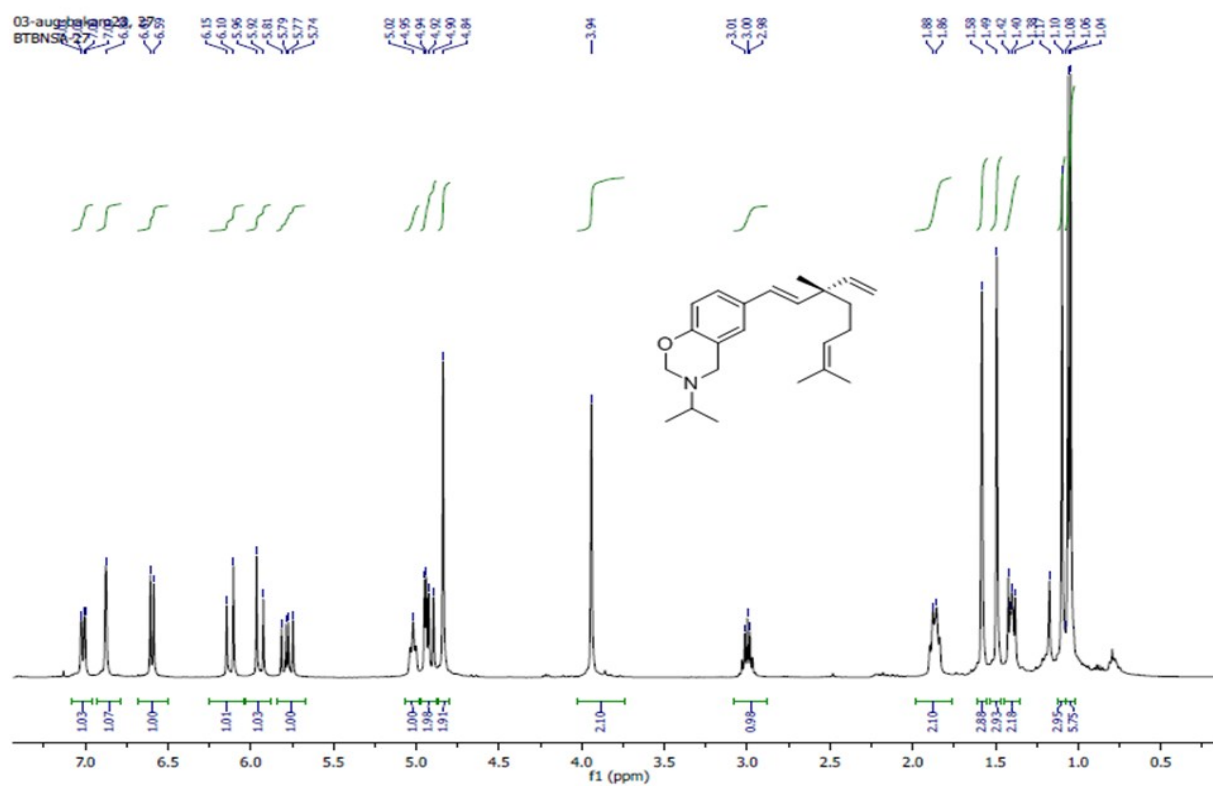

**26-<sup>13</sup>C NMR**

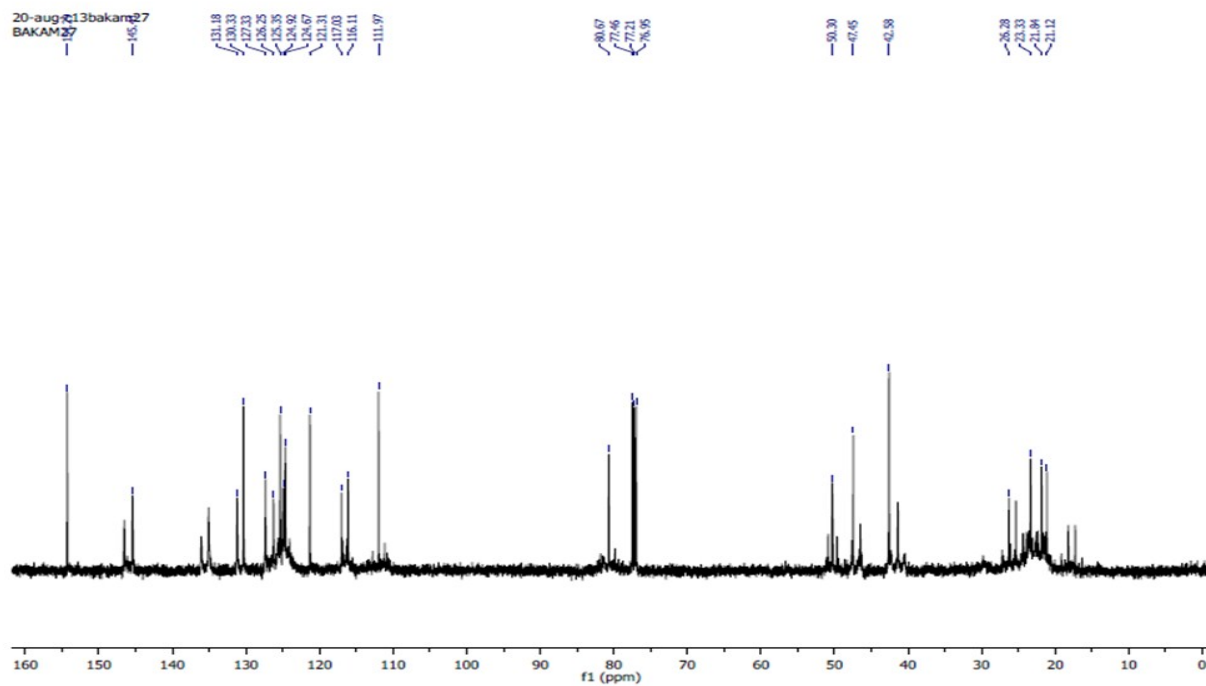

# DEPT- 26

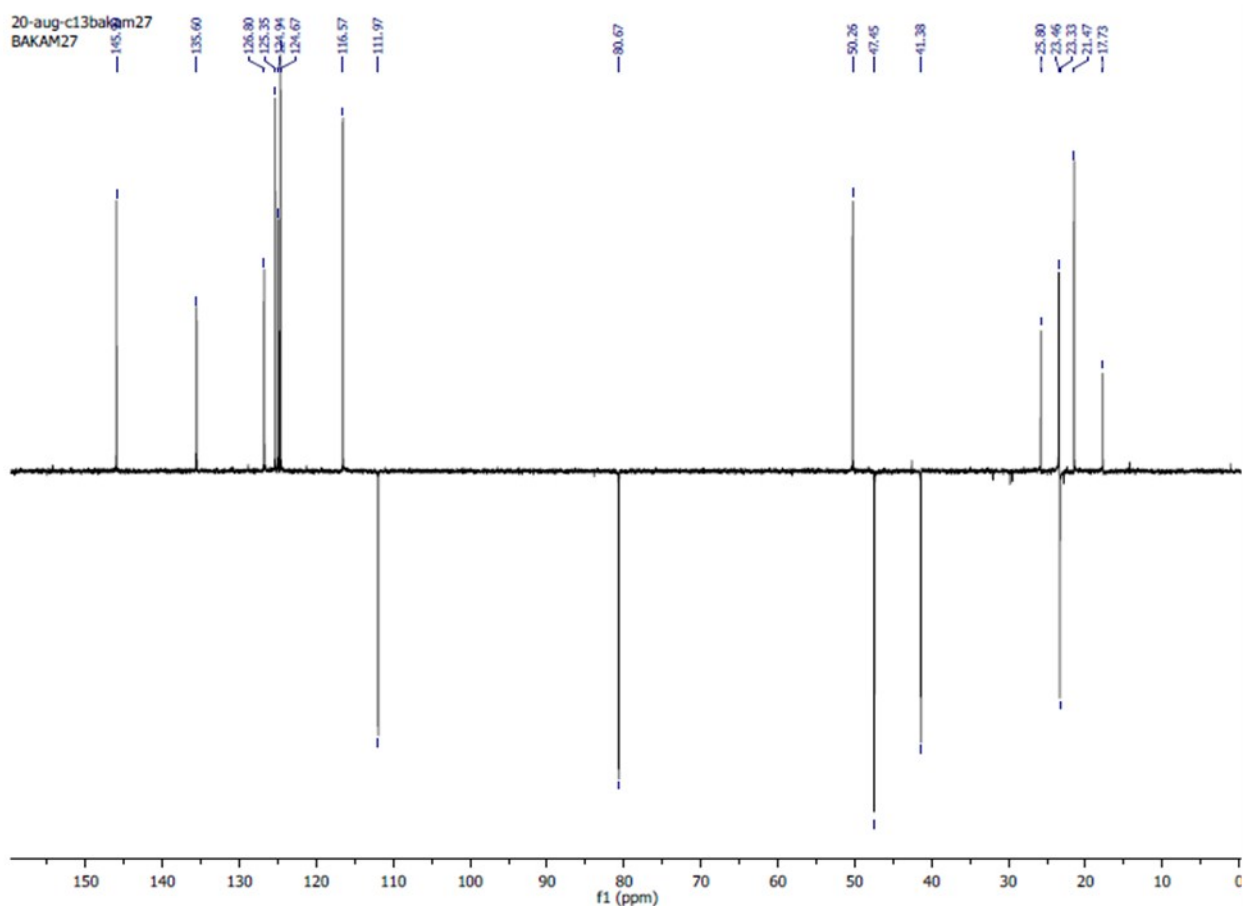

## 26-HRMS

| Compound Label                              | RT    | Mass     | Formula                             | MFG Formula                         | MFG Diff (ppm) | DB Formula                          |
|---------------------------------------------|-------|----------|-------------------------------------|-------------------------------------|----------------|-------------------------------------|
| Cpd 77: C <sub>23</sub> H <sub>33</sub> N O | 0.283 | 339.2543 | C <sub>23</sub> H <sub>33</sub> N O | C <sub>23</sub> H <sub>33</sub> N O | 5.72           | C <sub>23</sub> H <sub>33</sub> N O |

| Compound Label                              | m/z      | RT    | Algorithm                 | Mass     |
|---------------------------------------------|----------|-------|---------------------------|----------|
| Cpd 77: C <sub>23</sub> H <sub>33</sub> N O | 340.2615 | 0.283 | Find by Molecular Feature | 339.2543 |

### MFE MS Spectrum

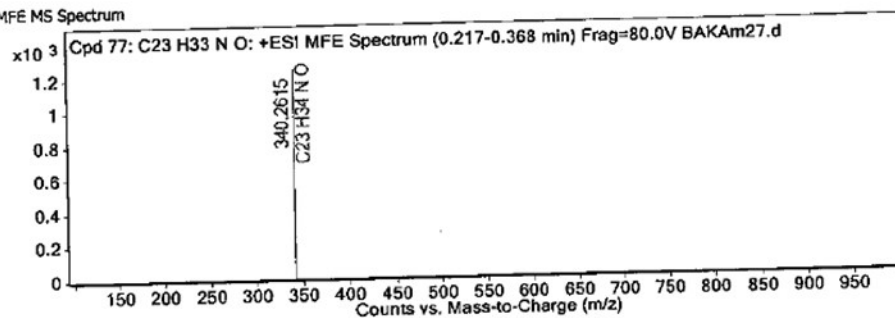

### MS Spectrum Peak List

| m/z      | z | Abund   | Formula                             | Ion                |
|----------|---|---------|-------------------------------------|--------------------|
| 340.2615 | 1 | 1252.26 | C <sub>23</sub> H <sub>34</sub> N O | (M+H) <sup>+</sup> |

### Predicted Isotope Match Table

| Isotope | m/z      | Calc m/z | Diff (ppm) | Abund % | Calc Abund % | Abund Sum % | Calc Abund Sum % |
|---------|----------|----------|------------|---------|--------------|-------------|------------------|
| 1       | 340.2615 | 340.2635 | 5.71       | 100     | 100          | 100         | 100              |
